# Supplementary material for: Association between daily antiretroviral pill burden and treatment adherence, hospitalisation risk, and other healthcare utilisation and costs in a US medicaid population with HIV
Source: PubMed Central journal article supplement — BMJ Open. 2013 Aug 1;3(8):e003028. doi: 10.1136/bmjopen-2013-003028 (PMC3733306; doi:10.1136/bmjopen-2013-003028), 2013-08-01
Supplement: bmjopen-2013-003028.draft_revisions.pdf [file bmjopen-2013-003028.draft_revisions.pdf]

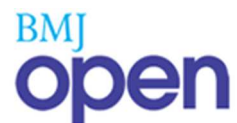

**Daily Antiretroviral Pill Burden Effects on Medication Adherence, Hospitalization Risk, and Health Care Utilization and Costs in a United States Medicaid Population With HIV**

|                                 |                                                                                                                                                                         |
|---------------------------------|-------------------------------------------------------------------------------------------------------------------------------------------------------------------------|
| Journal:                        | <i>BMJ Open</i>                                                                                                                                                         |
| Manuscript ID:                  | bmjopen-2013-003028                                                                                                                                                     |
| Article Type:                   | Research                                                                                                                                                                |
| Date Submitted by the Author:   | 10-Apr-2013                                                                                                                                                             |
| Complete List of Authors:       | Cohen, Calvin; CRI New England, Harvard Medical School, Meyers, Juliana; RTI Health Solutions, Health Economics<br>Davis, Keith; RTI Health Solutions, Health Economics |
| <b>Primary Subject Heading</b>: | HIV/AIDS                                                                                                                                                                |
| Secondary Subject Heading:      | Health economics, Health services research                                                                                                                              |
| Keywords:                       | HIV & AIDS < INFECTIOUS DISEASES, HEALTH ECONOMICS, THERAPEUTICS                                                                                                        |
|                                 |                                                                                                                                                                         |

SCHOLARONE™  
Manuscripts

1  
2  
3  
4 1 **Daily Antiretroviral Pill Burden Effects on Medication Adherence,**  
5  
6 2 **Hospitalization Risk, and Health Care Utilization and Costs in a United**  
7  
8  
9 3 **States Medicaid Population With HIV**

10  
11  
12 4  
13  
14  
15 5 **Short Title:** Antiretroviral Pill Burden in Medicaid Patients  
16  
17  
18 6

19  
20 7 **Authors and Affiliations:** Calvin Cohen,<sup>1</sup> Juliana L. Meyers,<sup>2</sup> Keith L. Davis<sup>2</sup>  
21

22 8 <sup>1</sup> CRI New England, Harvard Medical School, Boston, MA, USA  
23

24 9 <sup>2</sup> RTI Health Solutions, Research Triangle Park, NC, USA  
25  
26  
27 10

28  
29 11 **Key Words:** HIV, Medicaid, Adherence, Hospitalization, Health Care Utilization  
30  
31  
32 12

33  
34 13 **Word Count:** 4,876  
35  
36  
37 14

38  
39 15 **Corresponding Author**

40  
41 16 Keith L. Davis, MA  
42

43 17 RTI Health Solutions  
44

45 18 200 Park Offices Drive  
46

47  
48 19 Research Triangle Park, NC 27709 USA  
49

50 20 Telephone: 1.919.541.1273  
51

52  
53 21 Fax: +1.919.541.7222  
54

55 22 E-mail: kldavis@rti.org  
56  
57  
58  
59  
60

1  
2  
3 **ABSTRACT**  
4  
5

6 **Objectives:** Lower pill burden leads to improved adherence to antiretroviral therapy (ART)  
7  
8 among human immunodeficiency virus (HIV) patients. Simpler dosing regimens have not been  
9  
10 widely explored in real-world populations. We retrospectively assessed health care utilization  
11  
12 and costs in Medicaid enrollees with HIV treated with ART as a once-daily single-tablet regimen  
13  
14 (STR) or two or more pills per day (2+PPD).  
15  
16

17  
18 **Design:** Patients with an HIV diagnosis from 2005- 2009 receiving complete ART (i.e., 2  
19  
20 nucleoside/nucleotide reverse transcriptase inhibitors plus a third agent) for 60 days or more as  
21  
22 STR or 2+PPD were selected and followed until the first of 1) discontinuation of the complete  
23  
24 ART, 2) loss of continuous enrollment, or 3) end of the database. Adherence was measured using  
25  
26 the medication possession ratio. Monthly utilization and costs were observed from regimen  
27  
28 initiation until discontinuation and reported overall and by care setting (inpatient, emergency  
29  
30 department, office, pharmacy, other). To assess predictors of hospitalization, Poisson models,  
31  
32 counting the number of hospitalizations and covariates for demographics, comorbidities, and  
33  
34 ART-naïve status, were estimated.  
35  
36  
37

38 **Results:** Of the 7,381 patients who met inclusion criteria, 1,797 were treated with STR and  
39  
40 5,584 with 2+PPD. STR patients were significantly more likely to reach a 95% adherence  
41  
42 threshold and had fewer hospitalizations than 2+PPD patients (both:  $P < 0.01$ ). STR patients had  
43  
44 mean (SD) total monthly costs of \$2,959(\$4,962); 2+PPD patients had \$3,544(\$5,811)  
45  
46 ( $P < 0.001$ ). Hospital costs accounted for 53.8% and pharmacy costs accounted for 32.5% of this  
47  
48 difference. Multivariate analyses found that STR treatment led to a 23% reduction in  
49  
50 hospitalizations and a 17% reduction in health care costs.  
51  
52  
53  
54  
55  
56  
57  
58  
59  
60

1  
2  
3  
4  
5  
6  
7  
8  
9  
10  
11  
12  
13  
14  
15  
16  
17  
18  
19  
20  
21  
22  
23  
24  
25  
26  
27  
28  
29  
30  
31  
32  
33  
34  
35  
36  
37  
38  
39  
40  
41  
42  
43  
44  
45  
46  
47  
48  
49  
50  
51  
52  
53  
54  
55  
56  
57  
58  
59  
60

45       **Conclusions:** While it was expected that STR patients would have lower pharmacy costs, we  
46 also found that STR patients had fewer hospitalizations and lower hospital costs than 2+PPD  
47 patients, resulting in significantly lower total health care costs for STR patients.

For peer review only

## ARTICLE SUMMARY

### Article Focus

- To assess the effect of a single-tablet-per-day ART regimen (STR) on adherence and hospitalization risk in a large population of Medicaid enrollees in the United States who received treatment for HIV infection

### Key Messages

- Patients who received ART as a single pill per day were significantly more likely to be highly adherent to therapy than patients who received multiple-pill regimens.
- Improved adherence among patients treated with STR conferred a lower risk of hospitalization.
- The use of an STR may reduce health care costs as well as patient morbidity by decreasing hospitalization rates, which were higher in patients with less-than-complete medication adherence.

### Strengths and Limitations of This Study

- This retrospective analysis used pharmacy refill dates as the best available proxy for pill-taking behavior; one advantage to this method is that we can identify those patients who may not have had all or some of their medications available on any given date based on an analysis the timing in between refills, which also notes the amount of medication dispensed each time.
- Rates of hospitalization and correlates of hospitalization also were assessed from these claims data and should be highly accurate, as should measures of overall monthly health care utilization and costs.

- 1  
2  
3 70     ▪ While our prescription claims-based measure of adherence has been found to be a valid  
4  
5 71     proxy for actual medication-taking behavior, we had no measure of actual patient  
6  
7  
8 72     adherence (i.e., daily ingestion/consumption) to the prescriptions they filled.  
9  
10 73     ▪ Because we did not randomize patients to the two different treatment regimens, we  
11  
12 74     cannot exclude unmeasured confounding factors that may have influenced our outcomes;  
13  
14 75     although we attempted to control for some of these variables through the use of  
15  
16 76     multivariable models that included some of these factors (substance abuse and psychiatric  
17  
18 77     diagnoses), residual confounding may remain.  
19  
20 78     ▪ We had no laboratory results from patients and thus cannot confirm the degree of  
21  
22 79     virologic suppression obtained across the regimens.  
23  
24  
25  
26  
27  
28  
29  
30  
31  
32  
33  
34  
35  
36  
37  
38  
39  
40  
41  
42  
43  
44  
45  
46  
47  
48  
49  
50  
51  
52  
53  
54  
55  
56  
57  
58  
59  
60

## 80 **ADMINISTRATIVE STATEMENTS**

### 81 **Protection of Human Subjects**

82 The research organization that conducted this study, RTI Health Solutions, a business unit of  
83 RTI International (RTI), holds a Federal-Wide Assurance (FWA #3331 effective until June 17,  
84 2014) from the Department of Health and Human Services (DHHS) Office for Human Research  
85 Protections (OHRP) that allows us to review and approve human subjects protocols through our  
86 Institutional Review Board (IRB) committees. Since pre-existing, retrospective, de-identified  
87 patient data were analyzed for this study, which involved no patient contact or medical  
88 interventions and therefore no patient consent forms, the RTI IRB committee approved this study  
89 as exempt.

### 90 **Author Contributions**

91 Calvin Cohen assisted in development of the study design, evaluated and interpreted the  
92 study results, and drafted and critically revised the manuscript text. Juliana Meyers and Keith  
93 Davis assisted in development of the study design, obtained study funding, conducted all analytic  
94 programming and statistical analyses, assisted with evaluation and interpretation of the study

### 95 **Funding Statement**

96 This study was funded by Gilead Sciences, which is conducting clinical research in and  
97 markets current treatments for HIV/AIDS.

### 98 **Data Sharing**

99 Raw data used for this study are unavailable for public sharing (per terms of the private data  
100 use agreement governing original data acquisition).

### 101 **Acknowledgments**

102 The Authors would like to thank Francois Everhard (Gilead Sciences) for his support and  
103 input on the study design and manuscript.

## 104 INTRODUCTION

105 The 2012 Department of Health and Human Services guidelines state that there are four  
106 preferred regimens for initiating human immunodeficiency virus (HIV) treatment in adults.  
107 Furthermore, there are multiple alternatives to these four regimens.[1] Patients and their treating  
108 physicians can choose from among these four preferred regimens, using the criteria of greatest  
109 efficacy, safety, and simplicity. The latter category is important because regimen simplicity is  
110 associated with greater long-term adherence. For example, all four preferred regimens are  
111 constructed with a relatively low pill burden (i.e., between one and four tablets per day), and  
112 three of the four regimens have once-daily dosing. While randomized trials have compared the  
113 components of some of these four regimens with each other, to date no studies compared the four  
114 regimens to each other as they are prescribed (i.e., in a real-world setting), given that these study  
115 trials have been blinded.[2,3]

116 Adherence to antiretroviral therapy (ART) is essential for achieving durable clinical  
117 outcomes in patients with HIV. Patients with inadequate adherence to ART are at an increased  
118 risk for incomplete viral suppression; and unless a new suppressive regimen is quickly  
119 constructed to reestablish virologic suppression, viremia is associated with an increased risk of  
120 disease progression, and death.[4-8] In the past several years, the availability of fixed-dose  
121 combinations and agents with prolonged half-lives have simplified pill burden and thus increased  
122 regimen adherence.[1,9] Several clinical trials and cohort studies support the conclusion that  
123 once-daily single tablet regimens (STR) can lead to significantly improved adherence, patient  
124 satisfaction, and virological outcomes.[10-13] For example, among homeless or marginally  
125 housed patients, those receiving an ART regimen composed of a single tablet per day had better  
126 virologic outcomes and a 26% increase in adherence than patients receiving other multi-pill  
127 regimens.[13] One recently published study analyzing a claims database noted that compared



1  
2  
3 128 with various multi-pill regimens, a STR was associated with increased adherence (as determined  
4  
5  
6 129 by pharmacy refill data). Furthermore, the increased likelihood of complete adherence was  
7  
8 130 associated with a 25% decrease in the rate of hospitalization.[14]  
9

10  
11 131 In this study, we sought to assess how robust these findings were by analyzing similar  
12  
13 132 metrics in a separate data set. The primary objective of this retrospective database analysis was  
14  
15 133 to assess the effect of a single-tablet-per-day ART on adherence and hospitalization in a large  
16  
17 134 population of Medicaid enrollees in the United States who received treatment for HIV infection.  
18  
19  
20  
21  
22  
23  
24  
25  
26  
27  
28  
29  
30  
31  
32  
33  
34  
35  
36  
37  
38  
39  
40  
41  
42  
43  
44  
45  
46  
47  
48  
49  
50  
51  
52  
53  
54  
55  
56  
57  
58  
59  
60

1  
2  
3 135 **METHODS**  
4  
5

6 136 Data for this analysis were taken from the MarketScan Medicaid Multi-State Database,  
7  
8 137 which contains health care claims from approximately 30 million Medicaid enrollees from  
9  
10 138 11 geographically dispersed states. The database includes patient-level demographics; periods of  
11  
12 139 Medicaid enrollment; primary and secondary diagnoses; and detailed information about  
13  
14 140 hospitalizations and therapeutic procedures, inpatient and outpatient physician services, and  
15  
16 141 prescription drug use. In compliance with the Health Insurance and Portability and  
17  
18 142 Accountability Act of 1996, all data were de-identified to protect the privacy of individual  
19  
20 143 patients, physicians, and hospitals. Because the data were retrospective, pre-existing, and de-  
21  
22 144 identified, RTI International's institutional review board determined that this study met all  
23  
24 145 criteria for exemption.  
25  
26  
27  
28  
29

30 146 Patients were selected for inclusion if they received at least one HIV or AIDS diagnosis  
31  
32 147 (*International Classification of Diseases, 9th Revision, Clinical Modification* [ICD-9-CM] code  
33  
34 148 042.xx) between June 1, 2006, and December 31, 2009. Patients also were required to have  
35  
36 149 evidence of receipt of a complete ART regimen, defined as two nucleoside/nucleotide reverse  
37  
38 150 transcriptase inhibitors plus a third agent (i.e., another nucleoside/nucleotide reverse  
39  
40 151 transcriptase inhibitor, a nonnucleoside/nucleotide reverse transcriptase inhibitor, a protease  
41  
42 152 inhibitor [PI], a chemokine receptor R5 antagonist, or an integrase inhibitor). The first date of  
43  
44 153 receipt of a complete regimen was termed the index date. ART agents were identified in the  
45  
46 154 claims database by using National Drug Codes associated with relevant generic and brand  
47  
48 155 names. Patients also were required to remain on the complete ART regimen for at least 60 days  
49  
50 156 following their index dates and to have evidence of continuous enrollment in Medicaid during  
51  
52 157 this period. To assess treatment-naïve versus experienced status and baseline comorbidities,  
53  
54 158 patients were required to have at least 6 months of pre-index date Medicaid enrollment, with  
55  
56  
57  
58  
59  
60

1  
2  
3 159 enrollment information available from January 1, 2006 (i.e., 6 months before the earliest possible  
4  
5 160 index date).

6  
7  
8 161 Patients were grouped into two mutually exclusive cohorts according to the daily pill count  
9  
10 162 of their complete ART regimen. Patients were assigned to the STR cohort if they received an  
11  
12 163 ART regimen consisting of a single tablet (i.e., an STR) at any point during the selection  
13  
14 164 window, regardless of prior or subsequent use of other regimens. At the time of this study, only  
15  
16 165 coformulated tenofovir/emtricitabine/efavirenz was available as an STR. Patients were assigned  
17  
18 166 to the two-or-more-pills-per-day (2+PPD) cohort if they received a regimen consisting of two or  
19  
20 167 more pills per day during the selection window and if they did not receive an STR at any point  
21  
22 168 during that time.

23  
24  
25  
26  
27 169 Patients were followed from the start of their complete ART regimen (i.e., after June 1, 2006,  
28  
29 170 the study index date) until the earliest date of regimen discontinuation, disenrollment from the  
30  
31 171 health plan, or the end of the database (i.e., March 31, 2009). Furthermore, patients receiving  
32  
33 172 2+PPD were allowed to change medications, providing the patients continued to receive a  
34  
35 173 complete regimen. Patients receiving STR were followed for as long as they remained on the  
36  
37 174 STR. Discontinuation was defined as 60 consecutive days in which no refills were observed for  
38  
39 175 any component of the regimen. Females with an ICD-9-CM diagnosis code indicating a  
40  
41 176 pregnancy during the follow-up period were excluded from the analysis because the one  
42  
43 177 available STR is not recommended for pregnant women, and hospitalizations for labor and  
44  
45 178 delivery may have biased results in favor of the STR.

46  
47  
48  
49  
50 179 Patient characteristics measured at the index date included age, sex, and ART classes  
51  
52 180 received (i.e., nucleoside/nucleotide reverse transcriptase inhibitors, nonnucleoside/nucleotide  
53  
54 181 reverse transcriptase inhibitors, PIs, ritonavir boosting therapy, or other therapies). The presence  
55  
56 182 of comorbid medical conditions other than HIV or AIDS were assessed during the 6-month pre-  
57  
58  
59  
60

1  
2  
3 183 index period, using an established algorithm, the Charlson Comorbidity Index (CCI) score.[15]  
4  
5 184 This score is made up of 17 comorbidities (defined by ICD-9-CM diagnosis and procedure  
6  
7  
8 185 codes), such as myocardial infarction and chronic pulmonary disease, which are weighted to  
9  
10 186 correspond to the severity of the comorbid condition of interest. A higher comorbidity score  
11  
12 187 represents a higher overall comorbidity burden during the pre-index period. Additionally, the  
13  
14 188 incidence of other concomitant mental disorders (ICD-9-CM codes 306.xx through 319.xx) and  
15  
16 189 drug and alcohol abuse (ICD-9-CM codes 292.xx and 303.xx through 305.xx) during the 6-  
17  
18 190 month pre-index period also was assessed.  
19  
20  
21

22 191 Medication adherence was assessed using the medication possession ratio (MPR), which has  
23  
24 192 been shown to be the most widely adopted measure (57% of all studies) in published claims-  
25  
26 193 based analyses of medication adherence [16] and has been used in studies of ART adherence  
27  
28 194 among individuals with HIV.[17] The MPR, which is a proxy for refill compliance, generally  
29  
30 195 measures the proportion of the ART exposure period in which supply was maintained for all  
31  
32 196 ART components comprising the regimen. Specifically, MPR was calculated as the number of  
33  
34 197 filled prescription days for all ART regimen components (using the days supplied in the  
35  
36 198 pharmacy claims) divided by the number of days from the first observed prescription in the  
37  
38 199 regimen through the earliest of either the exhaustion of the days supplied of the last observed  
39  
40 200 prescription or the end of follow-up. For each patient in our study, the MPR was calculated over  
41  
42 201 the period in which the patient remained on his or her ART regimen. For patients in the 2+PPD  
43  
44 202 cohort, late refills and resulting days of missing supply for one or more ART components were  
45  
46 203 all factored against their adherence measurements. For example, patients in the 2+PPD cohort  
47  
48 204 with a supply for only one of the ART components on a given day were considered to have zero  
49  
50 205 adherence for that day. In addition to reporting the mean (standard deviation [SD]) MPR  
51  
52 206 achieved, we also reported the numbers and percentages of patients achieving various adherence  
53  
54  
55  
56  
57  
58  
59  
60

1  
2  
3 207 thresholds (i.e., MPRs of 1.0-0.95, 0.94-0.90, 0.89-0.85, and 0.84-0.80, corresponding to 100%-  
4  
5 208 95%, 94%-90%, 89%-85%, and 84%-80% adherence, respectively).  
6  
7

8 209 To further understand adherence to ART regimens, for each patient in the 2+PPD cohort,  
9  
10 210 complete (i.e., having a complete regimen), partial (i.e., receiving some but not all components  
11  
12 211 of a complete regimen), and no medication days also were assessed. Specifically, we reported the  
13  
14 212 percentage of days that each patient had complete, partial, and no medications available, along  
15  
16 213 with the mean number of days that the patient had complete, partial and no medications.  
17  
18 214 Additionally, we also reported the maximum number of consecutive days the patient had either  
19  
20 215 an incomplete regimen or no medications available.  
21  
22  
23

24 216 Hospitalizations were identified from the claims database using relevant place of service  
25  
26 217 codes. Hospitalizations were observed from the index date until the earliest date of regimen  
27  
28 218 discontinuation, end of enrollment in the health plan, or end of the database. The number and  
29  
30 219 percentage of patients with at least one hospitalization were reported, along with the mean (SD)  
31  
32 220 number of hospitalizations, and the mean (SD) number of inpatient days. Furthermore, we  
33  
34 221 compared and reported the number of hospitalizations per 100 patient-years, along with the rate  
35  
36 222 ratios and 95% confidence intervals, for both cohorts.  
37  
38  
39  
40

41 223 For each patient, overall health care utilization and associated costs were aggregated across  
42  
43 224 all encounters, regardless of reason, that were observed during the follow-up period; we reported  
44  
45 225 these costs by average and per-month amounts. The following categories of overall health care  
46  
47 226 utilization and costs were evaluated and reported: inpatient, emergency department, office visit,  
48  
49 227 home health visit, laboratory service, pharmacy, other outpatient care, and total. For each  
50  
51 228 category of overall health care, the number and percentage of patients, the mean (SD) number of  
52  
53 229 visits per month, and monthly per-patient costs were reported. Additionally, for patients with an  
54  
55  
56  
57  
58  
59  
60

1  
2  
3 230 inpatient visit, the average number of inpatient days per month among patients with at least one  
4  
5  
6 231 stay during follow-up also was reported.

7  
8 232 All analyses were carried out using SAS (version 9; Cary, North Carolina) statistical  
9  
10 233 software. Descriptive analyses were conducted for all outcome measures and included means and  
11  
12 234 SDs for continuous variables of interest (e.g., MPR) and frequency distributions of categorical  
13  
14 235 variables of interest (e.g., geographic region). All descriptive analyses were stratified by cohort.  
15  
16 236 Health care costs were updated to 2010 US dollars using the medical care component of the  
17  
18 237 consumer price index.

19  
20  
21  
22 238 A generalized linear model with a log link and a Poisson distribution was estimated to assess  
23  
24 239 the relationship between the number of pills per day and the number of hospitalizations observed  
25  
26 240 during follow-up. The dependent variable was a count of hospitalizations during exposure to the  
27  
28 241 ART regimen. Additionally, a generalized linear model with a log link and a negative binomial  
29  
30 242 distribution were estimated to assess monthly health care costs, adjusted for the patient and  
31  
32 243 treatment characteristics. The dependent variables were monthly total costs and monthly total  
33  
34 244 costs excluding costs pharmacy costs. For both models, independent variables included the  
35  
36 245 following: treatment regimen received (i.e., STR vs. 2+PPD), age, sex, CCI score, treatment-  
37  
38 246 naïve status, pre-index presence of mental health disorders, pre-index presence of alcohol or drug  
39  
40 247 abuse disorders, length of follow-up (in days, hospital model only), and whether or not the  
41  
42 248 patient met a 0.95 adherence threshold (cost model only). For the hospital model, incidence rate  
43  
44 249 ratios (IRRs) were reported for all covariates, along with the mean predicted number of  
45  
46 250 hospitalizations for patients receiving an STR versus patients receiving a 2+PPD. For the cost  
47  
48 251 model, adjusted predicted mean costs were reported.

## RESULTS

A total of 7,381 patients met the selection criteria (Figure 1). Of these, 5,584 patients (75.7%) received their ART regimen as 2+PPD; 1,797 patients (24.3%) received their ART regimen as a STR. On average, patients were approximately 42 years of age. Approximately 46% of patients were female (Table 1). Across both cohorts, the average CCI score was approximately the same (mean [SD]: 0.67 [1.38] among patients receiving an STR and 0.65 [1.36] among patients receiving 2+PPD). Furthermore, the incidence of concomitant mental disorders and drug and alcohol abuse diagnoses did not vary substantially by cohort. Patients receiving an STR had a mean regimen duration of 348 days; this was approximately 2.8 months shorter than the mean regimen duration of 433 days observed for patients receiving 2+PPD. Forty-seven percent of patients receiving an STR were treatment naïve, compared with 24.5% of patients receiving 2+PPD.

**Table 1. Characteristics of the study sample, by cohort.**

| Characteristic                              | STR   |         | 2+PPD |         |
|---------------------------------------------|-------|---------|-------|---------|
| All Patients (N, %)                         | 1,797 | 100.00% | 5,584 | 100.00% |
| Age, mean (SD)                              | 41.6  | (10.56) | 42.32 | (11.37) |
| Age category (N, %)                         |       |         |       |         |
| Aged less than 18 years                     | 40    | 2.23%   | 271   | 4.85%   |
| Aged 18 to 24 years                         | 95    | 5.29%   | 139   | 2.49%   |
| Aged 25 to 34 years                         | 269   | 14.97%  | 661   | 11.84%  |
| Aged 35 to 44 years                         | 622   | 34.61%  | 1,975 | 35.37%  |
| Aged 45 to 54 years                         | 591   | 32.89%  | 1,875 | 33.58%  |
| Aged 55 to 64 years                         | 176   | 9.79%   | 638   | 11.43%  |
| Aged 65+ years                              | 4     | 0.22%   | 25    | 0.45%   |
| Gender (N, %)                               |       |         |       |         |
| Male                                        | 945   | 52.59%  | 3,063 | 54.85%  |
| Female                                      | 852   | 47.41%  | 2,521 | 45.15%  |
| Charlson comorbidity index score, mean (SD) | 0.67  | (1.38)  | 0.65  | (1.36)  |
| Charlson comorbidities (N, %)               |       |         |       |         |
| Myocardial infarction                       | 11    | 0.61%   | 44    | 0.79%   |
| Congestive heart failure                    | 39    | 2.17%   | 141   | 2.53%   |

| Characteristic                                  | STR    |          | 2+PPD  |          |
|-------------------------------------------------|--------|----------|--------|----------|
|                                                 | N      | %        | N      | %        |
| Peripheral vascular disease                     | 14     | 0.78%    | 58     | 1.04%    |
| Cardiovascular disease                          | 52     | 2.89%    | 148    | 2.65%    |
| Dementia                                        | 4      | 0.22%    | 10     | 0.18%    |
| Chronic pulmonary disease                       | 259    | 14.41%   | 704    | 12.61%   |
| Rheumatological disease                         | 11     | 0.61%    | 23     | 0.41%    |
| Peptic ulcer disease                            | 9      | 0.50%    | 25     | 0.45%    |
| Mild liver disease                              | 20     | 1.11%    | 49     | 0.88%    |
| Severe liver disease                            | 117    | 6.51%    | 333    | 5.96%    |
| Diabetes mellitus without chronic complications | 145    | 8.07%    | 445    | 7.97%    |
| Diabetes mellitus with chronic complications    | 16     | 0.89%    | 89     | 1.59%    |
| Paraplegia                                      | 6      | 0.33%    | 34     | 0.61%    |
| Renal disease                                   | 11     | 0.61%    | 80     | 1.43%    |
| Cancer                                          | 82     | 4.56%    | 221    | 3.96%    |
| Metastatic cancer                               | 11     | 0.61%    | 26     | 0.47%    |
| Concomitant comorbidities (N, %)                |        |          |        |          |
| Mental disorders                                | 382    | 21.26%   | 1,340  | 24.00%   |
| Drug or alcohol abuse                           | 338    | 18.81%   | 856    | 15.33%   |
| Treatment naïve at index (N, %)                 | 853    | 47.47%   | 1,366  | 24.46%   |
| Mean (SD) regimen length                        | 348.17 | (259.32) | 433.46 | (351.50) |
| Index medications (N, %)                        |        |          |        |          |
| NRTI                                            | 1,797  | 100.00%  | 5,584  | 100.00%  |
| NNRTI                                           | 1,797  | 100.00%  | 1,500  | 26.86%   |
| PI                                              | 0      | 0.00%    | 4,064  | 72.78%   |
| Kaletra at index                                | ---    | ---      | 1,633  | 40.18%   |
| Boosted PI at index                             | ---    | ---      | 1,664  | 40.94%   |
| Non-boosted PI at index                         | ---    | ---      | 767    | 18.87%   |
| PE                                              | 0      | 0.00%    | 1,712  | 30.66%   |
| Other                                           | 0      | 0.00%    | 87     | 1.56%    |

NOTE. 2+PPD = two or more pills per day; NNRTI = nonnucleoside/nucleotide reverse transcriptase inhibitor; NRTI = nucleoside/nucleotide reverse transcriptase inhibitor; PE = pharmacokinetic enhancer; PI = protease inhibitor; SD = standard deviation; STR = once-daily single-tablet regimen.

Patients receiving an STR had significantly better adherence than patients receiving 2+PPD (Table 2). Approximately 25.3% of patients receiving an STR achieved 95% adherence or greater, compared with 17.4% of patients receiving 2+PPD ( $P \leq 0.0001$ ). Mean (SD) MPR was 0.84 (0.14) among patients receiving an STR and 0.80 (0.15) among patients receiving 2+PPD



(Table 2). Patients in the 2+PPD cohort received a complete regimen for 80.3% of the follow-up period (mean [SD]: 361.9 [315.0] days), a partial regimen for 5.6% of the follow-up period (mean [SD]: 22.2 [45.6] days), and no available medications for 14.1% of the follow-up period (mean [SD]: 49.4 [57.1] days) (Table 3). Alternatively, patients in the STR cohort received a complete regimen for 84.4% of the follow-up period (mean [SD]: 299.4 [234.6] days) and no available medications for 15.6% of the follow-up period (mean [SD]: 48.8 [54.2] days), which was a similar percentage of days as patients receiving 2+PPD. Patients receiving an STR had, on average, a maximum of 19.5 (SD: 15.9) consecutive days without a complete regimen (i.e., either a partial regimen or no medications available); patients receiving 2+PPD had, on average, a maximum of 23.9 (SD: 16.7) consecutive days without a complete regimen.

**Table 2. Adherence to antiretroviral therapy, by cohort.**

| Cohort            | Number of Patients | Mean (SD) MPR | MPR/Persistence Ratio (N, %) |        |             |        |             |        |             |        |          |        |
|-------------------|--------------------|---------------|------------------------------|--------|-------------|--------|-------------|--------|-------------|--------|----------|--------|
|                   |                    |               | <0.8                         |        | 0.8 - <0.85 |        | 0.85 - <0.9 |        | 0.9 - <0.95 |        | 0.95 - 1 |        |
| STR               | 1,797              | 0.84 (0.14)   | 537                          | 29.88% | 178         | 9.91%  | 243         | 13.52% | 385         | 21.42% | 454      | 25.26% |
| 2+PPD             | 5,584              | 0.80 (0.15)   | 2,255                        | 40.38% | 621         | 11.12% | 779         | 13.95% | 957         | 17.14% | 972      | 17.41% |
| Overall           | 7,381              | 0.81 (0.15)   | 2,792                        | 37.83% | 799         | 10.83% | 1,022       | 13.85% | 1,342       | 18.18% | 1,426    | 19.32% |
| P-Value (1 vs. 2) |                    | <.0001        | <.0001                       |        | 0.1491      |        | 0.6477      |        | <.0001      |        | <.0001   |        |

NOTE. 2+PPD = two or more pills per day; MPR = medication possession ratio; SD = standard deviation; STR = once-daily single-tablet regimen.

**Table 3. Summary of incomplete adherence, by cohort.**

| Adherence Characteristic                                   | STR             | 2+PPD           |
|------------------------------------------------------------|-----------------|-----------------|
| Percentage of days with complete adherence                 | 84.42%          | 80.37%          |
| Percentage of days with partial adherence                  | ---             | 5.56%           |
| Percentage of days with no ART medications                 | 15.58%          | 14.07%          |
| Complete adherence days, mean (SD)                         | 299.36 (234.56) | 361.87 (315.03) |
| Partial adherence days, mean (SD)                          | ---             | 22.24 (45.58)   |
| Days with no medication available, mean (SD)               | 48.81 (54.24)   | 49.35 (57.11)   |
| Total follow-up duration, mean (SD)                        | 348.17 (259.31) | 433.46 (351.50) |
| Maximum consecutive gap in therapy, <sup>a</sup> mean (SD) | 19.48 (15.89)   | 23.92 (16.67)   |

NOTE. 2+PPD = two or more pills per day; ART = antiretroviral therapy; SD = standard deviation; STR = once-daily single-tablet regimen.

<sup>a</sup> Represents either days with a partial regimen or days with no medications.

Among patients receiving an STR, 21.0% had at least one hospitalization, compared with 24.4% of patients receiving 2+PPD ( $P = 0.003$ ) (Table 4). Among patients with a hospitalization, patients receiving an STR had numerically similar, although significantly fewer, hospitalizations over all available follow-up, when compared with patients receiving 2+PPD (mean [SD]: 1.9 [1.6] among patients receiving an STR vs. 2.1 [2.2] among patients receiving 2+PPD;  $P = 0.001$ ).

**Table 4. All-cause average monthly per patient health care utilization and costs, by cohort.**

| Resource Used                                                         | STR   |           | 2+PPD   |           | P-Value |
|-----------------------------------------------------------------------|-------|-----------|---------|-----------|---------|
| <b>Hospitalizations</b>                                               |       |           |         |           |         |
| Had $\geq 1$ hospital admission (N, %) <sup>a</sup>                   | 378   | 21.04%    | 1,365   | 24.44%    | 0.0031  |
| Number of hospitalizations over all follow-up, <sup>b</sup> mean (SD) | 1.88  | (1.59)    | 2.1     | (2.23)    | 0.0012  |
| Inpatient days over all follow-up, <sup>b</sup> mean (SD)             | 9.99  | (12.33)   | 12.33   | (18.90)   | 0.0228  |
| <b>Number of admissions per month</b>                                 |       |           |         |           |         |
| Mean (Std. Dev)                                                       | 0.05  | (0.00)    | 0.05    | (0.15)    | 0.1429  |
| Median                                                                | 0     |           | 0       |           |         |
| Range (Min, Max)                                                      | 0     | 2         | 0       | 1.97      |         |
| <b>Days in hospital per month<sup>c</sup></b>                         |       |           |         |           |         |
| Mean (SD)                                                             | 1.32  | (2.21)    | 1.45    | (2.71)    | 0.3975  |
| Median                                                                | 0.58  |           | 0.5     |           |         |
| Range (Min, Max)                                                      | 0.03  | 21.5      | 0.03    | 32.43     |         |
| <b>Costs</b>                                                          |       |           |         |           |         |
| Mean (Std. Dev)                                                       | \$834 | (\$4,480) | \$1,152 | (\$5,212) | 0.0203  |
| Median                                                                | \$0   |           | \$0     |           |         |
| Range (Min, Max)                                                      | \$0   | \$143,530 | \$0     | \$97,626  |         |
| <b>Emergency Room (ER)</b>                                            |       |           |         |           |         |
| Had $\geq 1$ ER visit (N, %) <sup>a</sup>                             | 903   | 50.25%    | 2,749   | 49.23%    | 0.4517  |
| <b>Number of visits</b>                                               |       |           |         |           |         |
| Mean (Std. Dev)                                                       | 0.97  | (3.00)    | 1.01    | (2.99)    | 0.6107  |
| Median                                                                | 0.03  |           | 0       |           |         |
| Range (Min, Max)                                                      | 0     | 67        | 0       | 89.91     |         |
| <b>Costs</b>                                                          |       |           |         |           |         |
| Mean (Std. Dev)                                                       | \$45  | (\$160)   | \$46    | (\$135)   | 0.873   |
| Median                                                                | \$0   |           | \$0     |           |         |
| Range (Min, Max)                                                      | \$0   | \$3,063   | \$0     | \$4,161   |         |
| <b>Office Visits (Primary Care) (N, %)</b>                            |       |           |         |           |         |
| Had $\geq 1$ office visit (N, %) <sup>a</sup>                         | 1,509 | 83.97%    | 4,699   | 84.15%    | 0.8576  |

| Resource Used                                  | STR     |           | 2+PPD   |           | P-Value |
|------------------------------------------------|---------|-----------|---------|-----------|---------|
| Number of visits                               |         |           |         |           |         |
| Mean (Std. Dev)                                | 1.52    | (3.00)    | 1.43    | (2.19)    | 0.1669  |
| Median                                         | 0.92    |           | 0.86    |           |         |
| Range (Min, Max)                               | 0       | 61        | 0       | 40.30     |         |
| Costs                                          |         |           |         |           |         |
| Mean (Std. Dev)                                | \$75    | (\$229)   | \$70    | (\$291)   | 0.5087  |
| Median                                         | \$30    |           | \$26    |           |         |
| Range (Min, Max)                               | \$0     | \$5,012   | \$0     | \$15,499  |         |
| Home Health (N, %)                             |         |           |         |           |         |
| Had ≥ 1 home health visit (N, %) <sup>a</sup>  | 504     | 28.05%    | 1,861   | 33.33%    | <.0001  |
| Number of visits                               |         |           |         |           |         |
| Mean (Std. Dev)                                | 0.64    | (3.00)    | 0.79    | (3.16)    | 0.0625  |
| Median                                         | 0       |           | 0       |           |         |
| Range (Min, Max)                               | 0       | 45        | 0       | 43.06     |         |
| Costs                                          |         |           |         |           |         |
| Mean (Std. Dev)                                | \$47    | (\$198)   | \$88    | (\$642)   | 0.007   |
| Median                                         | \$0     |           | \$0     |           |         |
| Range (Min, Max)                               | \$0     | \$4,142   | \$0     | \$36,653  |         |
| Laboratory (N, %)                              |         |           |         |           |         |
| Had ≥ 1 lab order (N, %) <sup>a</sup>          | 1,168   | 65.00%    | 3,530   | 63.22%    | 0.1722  |
| Number of claims                               |         |           |         |           |         |
| Mean (Std. Dev)                                | 1.24    | (2.00)    | 1.19    | (1.69)    | 0.2962  |
| Median                                         | 0.66    |           | 0.57    |           |         |
| Range (Min, Max)                               | 0       | 16        | 0       | 19.96     |         |
| Costs                                          |         |           |         |           |         |
| Mean (Std. Dev)                                | \$52    | (\$94)    | \$46    | (\$120)   | 0.0401  |
| Median                                         | \$20    |           | \$17    |           |         |
| Range (Min, Max)                               | \$0     | \$1,689   | \$0     | \$7,246   |         |
| Pharmacy (N, %)                                |         |           |         |           |         |
| Had ≥ 1 pharmacy claim (N, %) <sup>a</sup>     | 1,797   | 100.00%   | 5,584   | 100.00%   | ---     |
| Number of claims                               |         |           |         |           |         |
| Mean (Std. Dev)                                | 4.99    | (4.00)    | 6.73    | (4.05)    | <.0001  |
| Median                                         | 3.96    |           | 5.76    |           |         |
| Range (Min, Max)                               | 0.37    | 27        | 0.69    | 37.17     |         |
| Costs                                          |         |           |         |           |         |
| Mean (Std. Dev)                                | \$1,593 | (\$1,105) | \$1,779 | (\$1,307) | <.0001  |
| Median                                         | \$1,494 |           | \$1,617 |           |         |
| Range (Min, Max)                               | \$0     | \$27,034  | \$0     | \$54,232  |         |
| OP/ancillary (N, %)                            |         |           |         |           |         |
| Had ≥ 1 other OP/ancillary (N, %) <sup>a</sup> | 1,754   | 97.61%    | 5,469   | 97.94%    | 0.3957  |
| Number of visits                               |         |           |         |           |         |
| Mean (Std. Dev)                                | 0.15    | (0.00)    | 0.14    | (0.13)    | 0.0078  |
| Median                                         | 0.12    |           | 0.11    |           |         |
| Range (Min, Max)                               | 0       | 1         | 0       | 0.52      |         |
| Costs                                          |         |           |         |           |         |
| Mean (Std. Dev)                                | \$313   | (\$607)   | \$363   | (\$733)   | 0.0087  |
| Median                                         | \$139   |           | \$159   |           |         |
| Range (Min, Max)                               | \$0     | \$8,946   | \$0     | \$15,936  |         |

| Resource Used                                            | STR     |           | 2+PPD   |           | P-Value |
|----------------------------------------------------------|---------|-----------|---------|-----------|---------|
| Total Health Care Utilization & Costs                    |         |           |         |           |         |
| Had $\geq 1$ medical visit/encounter (N, %) <sup>a</sup> | 1,797   | 100.00%   | 5,584   | 100.00%   | ---     |
| Number of total encounters                               |         |           |         |           |         |
| Mean (Std. Dev)                                          | 14.69   | (14.00)   | 16.97   | (13.72)   | <.0001  |
| Median                                                   | 11.34   |           | 13.13   |           |         |
| Range (Min, Max)                                         | 0.56    | 250       | 0.96    | 232.02    |         |
| Costs                                                    |         |           |         |           |         |
| Mean (Std. Dev)                                          | \$2,959 | (\$4,962) | \$3,544 | (\$5,811) | 0.0001  |
| Median                                                   | \$1,916 |           | \$2,182 |           |         |
| Range (Min, Max)                                         | \$0     | \$146,367 | \$0     | \$103,103 |         |

NOTE: SD = standard deviation.

<sup>a</sup>Estimated over all available follow-up.

<sup>b</sup>Among hospitalized patients.

<sup>c</sup>Among patients with at least one admission over all follow-up.

The multivariate Poisson regression model showed that receiving an STR was associated with a significantly lower risk of hospitalization than receiving the 2+PPD regimen (IRR = 0.8457;  $P < 0.001$ ) (Table 5). When the received regimen type was controlled for, we found that patients were significantly more likely to be hospitalized if they had the following characteristics: a concomitant mental disorder diagnosis (vs. no concomitant mental disorder diagnosis; IRR = 1.2917;  $P < 0.001$ ), a concomitant drug or alcohol abuse diagnosis (vs. no concomitant drug or alcohol abuse diagnosis; IRR = 2.0357;  $P < 0.001$ ), a CCI score greater than 1 (IRR increased with increasing CCI score, from 2.3779 among patients with a CCI between 1 and 2 to 2.6432 among patients with a CCI greater than 3; all  $P < 0.001$ ), were female (vs. male; IRR = 1.1069;  $P = 0.003$ ), or were older than 35 years (vs. younger than 35 years; IRR increased with increasing age, up to 54 years, from 1.2482 among patients aged 35-44 years to 1.555 among patients aged 45-54 years; both  $P < 0.1$ ). Additionally, the likelihood of a hospitalization increased with each additional day of follow-up (IRR = 1.0013;  $P < 0.0001$ ).

**Table 5. Predictors of hospitalization, using multivariate Poisson regression, and controlling for treatment cohort.**

| Specification: Adherence Covariate Excluded                                         | Poisson Count Model |                      |         |
|-------------------------------------------------------------------------------------|---------------------|----------------------|---------|
|                                                                                     | Parameter Estimate  | Incidence Rate Ratio | P-Value |
| Received a STR (vs. 2+PPD regimen)                                                  | -0.1654             | 0.8475               | 0.0001  |
| Female (vs. male)                                                                   | 0.1003              | 1.1069               | 0.003   |
| Age (vs. less than 35)                                                              |                     |                      |         |
| 35 to 44 years                                                                      | 0.1016              | 1.2482               | 0.0669  |
| 45 to 54 years                                                                      | 0.2217              | 1.555                | <.0001  |
| 55+ years                                                                           | 0.4415              | 1.1056               | <.0001  |
| Charlson comorbidity index score (vs. Charlson comorbidity index score less than 1) |                     |                      |         |
| Between 1 and 2                                                                     | 0.8662              | 2.3779               | <.0001  |
| Greater than 2                                                                      | 0.972               | 2.6432               | <.0001  |
| Treatment naïve (vs. treatment experienced)                                         | 0.1196              | 1.127                | 0.0033  |
| Had a mental disorder diagnosis (vs. no mental disorder diagnosis)                  | 0.256               | 1.2917               | <.0001  |
| Had a drug or alcohol abuse diagnosis (vs. no drug or alcohol abuse diagnosis)      | 0.7109              | 2.0357               | <.0001  |
| Length of follow-up (in days)                                                       | 0.0013              | 1.0013               | <.0001  |

NOTE. 2+PPD = two or more pills per day; STR = once-daily single-tablet regimen.

From the Poisson regression analysis described above, we found the adjusted rate of hospitalization to be significantly lower for patients receiving an STR than for patients receiving 2+PPD (i.e., 39.5 hospitalizations per 100 patients receiving STR vs. 51.2 hospitalizations per 100 patients receiving 2+PPD) (Figure 2). These adjusted hospitalization rates translated to a 23% lower risk of hospitalization among patients receiving an STR, compared with patients receiving 2+PPD.

The percentage of patients with at least one home health visit was significantly lower among patients receiving STR than for patients receiving 2+PPD (Table 4). Between the two cohorts, no differences were observed in the percentage of patients with at least one emergency room, office visit, or laboratory claim. Similarly, no significant differences were found in the number of emergency room, office visits, home health visits, or laboratory claims per month. However, patients who received an STR had significantly lower costs per month associated with inpatient,

1  
2  
3 334 home health, laboratory, pharmacy, other, and total health care than patients receiving 2+PPD.  
4  
5  
6 335 Mean (SD) total health care costs per month were \$2,959 (\$4,962) among patients receiving an  
7  
8 336 STR and \$3,544 (\$5,811) among patients receiving 2+PPD; thus, patients receiving an STR  
9  
10 337 accrued, on average per month, \$585 less than patients receiving 2+PPD ( $P < 0.001$ ). The largest  
11  
12 338 difference in costs between the two cohorts was observed for inpatient admissions (\$317 more  
13  
14 339 for patients receiving 2+PPD), followed by pharmacy costs (\$187 more for patients receiving  
15  
16 340 2+PPD).  
17  
18  
19

20 341 When monthly health care costs were adjusted for demographic, clinical, and treatment  
21  
22 342 characteristics, patients receiving an STR had monthly total costs averaging \$2,947; patients  
23  
24 343 receiving 2+PPD had monthly total costs averaging \$3,549 (Figure 3). Thus, patients receiving  
25  
26 344 2+PPD had \$602 more in monthly health care costs, which corresponded to a 17% reduction in  
27  
28 345 costs associated with STR. Additionally, when monthly health care costs, excluding pharmacy  
29  
30 346 costs, were adjusted for demographic, clinical, and treatment characteristics, patients receiving  
31  
32 347 an STR had monthly total costs averaging \$1,370; patients receiving 2+PPD had monthly total  
33  
34 348 costs averaging \$1,797. Thus, patients receiving 2+PPD had \$427 more in adjusted monthly  
35  
36 349 health care costs, which corresponded to a 23.8% reduction in costs associated with STR.  
37  
38  
39  
40  
41  
42  
43  
44  
45  
46  
47  
48  
49  
50  
51  
52  
53  
54  
55  
56  
57  
58  
59  
60

## DISCUSSION

This retrospective database analysis examined adherence to ART regimens among patients with HIV infection, using pharmacy refill dates as the best available proxy for pill-taking behavior. One advantage to this method is that we can identify those patients who may not have had all or some of their medications available on any given date based on an analysis of the timing in between refills, which also notes the amount of medication dispensed each time. The rate of hospitalization and correlates of hospitalization also were assessed from these claims data and should be highly accurate, as should the overall monthly health care utilization and costs.

This analysis largely confirms the previous report from Sax et al.[14]: we found that patients receiving an STR had significantly better adherence rates than patients receiving multiple pills per day. Our other finding was that higher rates of adherence were associated with similar or lower rates of hospitalization, regardless of the regimen; less-than-complete adherence was associated with higher rates of hospitalization and overall costs. Thus, multiple-pill regimens were associated both with lower rates of complete adherence and correspondingly higher overall health care costs. We observed a significantly higher rate of hospitalizations occurring in patients receiving multiple-pill regimens ( $P < 0.001$ ) than in patients receiving an STR. The greater total health care costs were due to differences in both the pharmacy costs of the regimen components as well as the costs of hospitalizations and associated care. Therefore, one implication of our findings is that choosing a multiple-pill regimen for its cost alone might inadvertently result in little to no total health care cost-savings for a payer, given the potential risk of more frequent hospitalizations in patients receiving multiple-pill regimens.

Similar to previous studies [18,19], we found that patients who were adherent to therapy were less likely to be hospitalized. Our data demonstrated similar rates of hospitalizations among patients with the highest levels of complete adherence—at least 95%. This was consistent across



1  
2  
3 374 both treatment cohorts. This finding suggests that the differences observed in the rates of  
4  
5 375 hospitalizations across regimens are primarily due to differences in adherence rates between the  
6  
7  
8 376 STR and 2+PPD regimens rather than any concerns for toxicities. This finding also may partially  
9  
10 377 address the potential contribution of channeling bias, a concern with any observational data set.  
11  
12 378 We found that adherent patients on any regimen have similar rates of hospitalization, which  
13  
14 379 suggests that there may not have been a consistent bias to prescribe to more clinically  
15  
16 380 immunosuppressed patients or to patients who were at greater risk for hospitalization due to  
17  
18 381 other factors than a multiple-pill regimen. Furthermore, we found that the outcome of fewer  
19  
20 382 hospitalizations for patients receiving an STR was consistent when we compared hospitalization  
21  
22 383 risks for treatment-naïve patients with hospitalization risks for treatment-experienced patients. In  
23  
24 384 the latter group, the impact of stage of illness prior to treatment would be lessened, given the  
25  
26 385 impact of prior treatment on improving pretreatment immunosuppression, with an STR regimen.  
27  
28 386 Of final note regarding channeling bias, previous analyses of Medicaid beneficiaries with HIV  
29  
30 387 have shown that patients receiving ART are completely non-adherent (i.e., days with no ART  
31  
32 388 supply/coverage on hand) for approximately 14% of their regimen duration regardless of the  
33  
34 389 number of pills in the regimen [20]. This finding suggests that clinicians are not channeling more  
35  
36 390 adherent patients to STRs. Together, these data support the observation that facilitating greater  
37  
38 391 adherence to ART at any stage of illness may result in reducing hospitalization risk.

39  
40  
41 392 One follow-up question our study findings raises is whether the observed reduction in  
42  
43 393 hospitalization risk and costs with STR was also due to less prevalent chronic comorbidities in  
44  
45 394 patients prescribed STR. To assess this possibility, we replicated key descriptive analyses on  
46  
47 395 hospitalization rates for patients with no baseline comorbidities as reported by the CCI. We  
48  
49 396 found that the majority (~70%) of both STR and 2+PPD patients had no other CCI  
50  
51 397 comorbidities. Among STR patients with no other comorbidities from the CCI, 13.9% had a  
52  
53  
54  
55  
56  
57  
58  
59  
60



1  
2  
3 398 hospitalization compared with 18.3% of 2+PPD patients with no other comorbidities. Further,  
4  
5 399 among STR patients with no comorbidities, 11.4% of adherent patients had a hospitalization  
6  
7  
8 400 compared with 14.7% of non-adherent patients. Similarly, among 2+PPD patients with no  
9  
10 401 comorbidities, 12.4% of adherent patients had a hospitalization compared with 19.7% of non-  
11  
12 402 adherent patients. Results of this sensitivity analysis, combined with the observation that the vast  
13  
14 403 majority of patients in our study had no major comorbidities (from the CCI) requiring other  
15  
16 404 chronic treatment, suggest that the observed association between poorer adherence and higher  
17  
18 405 hospitalization was likely due to reduced ART adherence and not due to reduced adherence with  
19  
20 406 other medications patients were taking.  
21  
22  
23

24 407 There were several measurable differences present in the study population at baseline. Our  
25  
26 408 study attempted to control for effects these differences may have had on rates of adherence and  
27  
28 409 hospitalization. We used multivariate regressions to control for patient demographics, treatment  
29  
30 410 characteristics (i.e., treatment naïve vs. experienced, type of ART received, year the ART was  
31  
32 411 received), and clinical characteristics (i.e., CCI score, concomitant mental disorder, drug and  
33  
34 412 alcohol abuse diagnoses). We found a number of factors were associated with an increased risk  
35  
36 413 of poor adherence, including having a CCI score greater than 3; having a drug or alcohol abuse  
37  
38 414 diagnosis; and being treatment experienced. Similarly, having a CCI score greater than 1, or  
39  
40 415 having a concomitant mental disorder or drug or alcohol abuse diagnosis were associated with an  
41  
42 416 increased risk of hospitalization. Nevertheless, after controlling for these factors, we still  
43  
44 417 detected an independent effect of the regimen.  
45  
46  
47  
48  
49

50 418 One hypothesis for a plausible mechanism by which these outcomes could occur stems from  
51  
52 419 observations in the SMART study.[21] That study, comparing continuous antiviral treatment  
53  
54 420 versus periodic treatment interruptions, demonstrated that HIV treatment interruptions that were  
55  
56 421 of sufficient length of time to lead to recurrent HIV viremia were associated with a significantly  
57  
58  
59  
60

1  
2  
3 422 higher risk of all-cause morbidity and mortality. Our analysis was consistent with those findings:  
4  
5 423 the mean maximum duration of nonadherence was about 3 weeks, which is a sufficient length of  
6  
7  
8 424 time to expect a return of HIV viremia. The SMART study noted that the higher risk of illness  
9  
10 425 was not necessarily proximal to the time of the interruption but was observed for months  
11  
12 426 afterwards. While there are differences between the SMART study design and population and  
13  
14 427 our study population, our findings are consistent with SMART and with what might be expected  
15  
16 428 in a population who periodically are without antivirals for an average time of more than 3 weeks.  
17  
18 429 Of note, short cycle interruptions of 2 days were not associated with virologic rebound in  
19  
20 430 patients receiving the STR that was used in the SMART study [22]. Therefore, our finding that  
21  
22 431 the typical interruptions were much longer than this is supportive of a mechanism that could  
23  
24 432 have resulted in increased patient morbidity.  
25  
26  
27  
28

29 433 It is also important to note that patients in this study generally were reasonably adherent to  
30  
31 434 ART, with a mean adherence of just over 80% regardless of the number of pills received per day.  
32  
33 435 This rate of adherence is consistent with other published reports of adherence, although other  
34  
35 436 reports found even higher adherence rates to an STR.[11,12] Furthermore, the difference  
36  
37 437 observed in our study between the STR and 2+PPD regimens (approximately 4%) is consistent  
38  
39 438 with what was observed by Sax et al. of 2.2%.[14] This difference is also consistent with the  
40  
41 439 differences in adherence rates reported when comparing average improvement between once-  
42  
43 440 daily and twice-daily regimens (2.9%).[23] It is important to note that there also were highly  
44  
45 441 nonadherent patients to both the STR and the 2+PPD regimes in this study population,  
46  
47 442 supporting the generalizability of this population.  
48  
49  
50  
51  
52

53 443 Of further note, the differences observed in our study were associated with factors that  
54  
55 444 typically are not present during randomized clinical trials. Randomized trials typically actively  
56  
57 445 work for patient adherence to study medications and use study coordinators to regularly monitor  
58  
59  
60

1  
2  
3 446 patients to minimize missed doses. In our observational study, these typical adherence supports  
4  
5 447 are not in place; thus, our data may reflect real-world lapses in patient behavior in refilling  
6  
7  
8 448 prescriptions, including partial regimen refills, which would not be observed in clinical trials.  
9  
10 449 While there are concerns about the interpretation of observational data and the determination of  
11  
12 450 causal relationships, it is not clear if a randomized study comparing an STR with a multiple-pill  
13  
14 451 regimen would be able to detect the observed differences unless there was less patient support  
15  
16 452 than is standard in clinical trials.  
17  
18  
19

20 453 Our data do not suggest that all patients should be on an STR. There are many factors that  
21  
22 454 weigh in the decision of which regimen is best for any given patient, including pre-existing  
23  
24 455 virologic resistance and tolerability. In our study, the anticipated adherence benefits observed in  
25  
26 456 association with a lower pill burden is relevant but should not be construed as a suggestion that  
27  
28 457 an STR is the ideal choice for the entire population of patients with HIV. Nevertheless, our data  
29  
30 458 do support the continued development of additional STR options, to broaden the number of  
31  
32 459 patients for whom this is an option and the number of subsequent beneficial outcomes.  
33  
34  
35

36 460 Our study has several limitations common to observational claims database analyses.  
37  
38 461 Adherence was calculated by using pharmacy refill dates, and we have no measure of actual  
39  
40 462 patient adherence to the prescriptions they filled. However, this measure has been found to be a  
41  
42 463 useful proxy for actual medication adherence.[24] Because we did not randomize patients to the  
43  
44 464 two different treatment regimens, we cannot exclude unmeasured confounding factors that may  
45  
46 465 have influenced our outcomes. Among the most important of these factors in this study was that  
47  
48 466 multiple trials have shown that medication resistance at the time of virologic failure is  
49  
50 467 significantly less common in boosted PI treatments than on other regimens, including  
51  
52 468 nonnucleoside/nucleotide reverse transcriptase inhibitor-based treatments.[25,26] Clinicians  
53  
54 469 could have chosen to prescribe a boosted-PI-containing regimen (all of which contain three or  
55  
56  
57  
58  
59  
60

1  
2  
3 470 more pills per day) to their less-adherent patients. It cannot be determined from this data set that  
4  
5 471 these patients would have been more adherent on an STR. Although we attempted to control for  
6  
7  
8 472 some of these variables through the use of multivariable models that included some of these  
9  
10 473 factors (substance abuse and psychiatric diagnoses), residual confounding may remain. In  
11  
12 474 addition, we had no laboratory results from patients and thus cannot confirm the degree of  
13  
14 475 virologic suppression obtained across the regimens.

15  
16  
17 476 In our study, a large proportion of HIV-treated individuals (15% of the total HIV-treated  
18  
19 477 population) were excluded from the analysis due to their having received incomplete ART  
20  
21 478 regimens. We did not have sufficient data on these patients to explain why their regimens were  
22  
23 479 incomplete. However, a previous study found that physician medication errors were somewhat  
24  
25 480 common in individuals with HIV, with the most common error occurring with boosted PIs  
26  
27 481 (estimated at 5.3% of patients); such errors may explain some of the incomplete regimens  
28  
29 482 observed in our analysis.[27] Increased adoption of fixed-dose combinations as part of HIV  
30  
31 483 treatment may help to alleviate the issue of incomplete regimens.

32  
33  
34 484 During our study period, the only available single-pill ART regimen was coformulated  
35  
36 485 efavirenz/emtricitabine/tenofovir disoproxil fumarate. It is possible that these results would not  
37  
38 486 be generalizable to other one- and multi-pill regimens if other treatments have different efficacy  
39  
40 487 and toxicity profiles. With the recent approval by the Food and Drug Administration of two other  
41  
42 488 STRs (i.e., tenofovir, emtricitabine, and rilpivirine and tenofovir, emtricitabine, elvitegravir and  
43  
44 489 cobicistat), it may eventually be possible to explore the applicability of our observations to other  
45  
46 490 STRs.

47  
48  
49 491 In summary, this study supported the results as reported by Sax et al.[14] We found that  
50  
51 492 patients who received ART as a single pill per day were significantly more likely to be highly  
52  
53 493 adherent to therapy than patients who received multiple-pill regimens. This difference in  
54  
55  
56  
57  
58  
59  
60

1  
2  
3 494 adherence was associated with a lower risk of hospitalizations: patients with less-than-complete  
4  
5  
6 495 adherence were more likely to be hospitalized. While we acknowledge the limitations associated  
7  
8 496 with any observational study, our data support our finding that the use of an STR may reduce  
9  
10 497 health care costs as well as patient morbidity by decreasing hospitalization rates, which are  
11  
12 498 higher in patients with less-than-complete medication adherence.  
13  
14  
15  
16  
17  
18  
19  
20  
21  
22  
23  
24  
25  
26  
27  
28  
29  
30  
31  
32  
33  
34  
35  
36  
37  
38  
39  
40  
41  
42  
43  
44  
45  
46  
47  
48  
49  
50  
51  
52  
53  
54  
55  
56  
57  
58  
59  
60

499 **REFERENCES**

- 500 1. Thompson MA, Aberg JA, Cahn P, Montaner JSG, Rizzardini G, et al. (2010)  
501 Recommendations of the IAS-USA Panel. *JAMA* 304: 321-333.
- 502 2. Henry K (2010) Report from the 17th Conference on Retroviruses and Opportunistic  
503 Infections. More data and answers from ACTG 5202. *J Watch AIDS Clin Care* 22 (4):  
504 30.
- 505 3. Rockstroh JK, Lennox JL, Dejesus E, Saag MS, Lazzarin A, et al; STARTMRK  
506 Investigators (2011) Long-term treatment with raltegravir or efavirenz combined with  
507 tenofovir/emtricitabine for treatment-naïve human immunodeficiency virus-1-infected  
508 patients: 156-week results from STARTMRK. *Clin Infect Dis* 53 (8): 807-816.
- 509 4. Fielden SJ, Rusch ML, Yip B, Wood E, Shannon K, et al. (2008) Nonadherence increases  
510 the risk of hospitalization among HIV-infected antiretroviral naïve patients started on  
511 HAART. *J Int Assoc Physicians AIDS Care* 7: 238-244.
- 512 5. Kitahata MM, Reed SD, Dillingham PW, Van Rompaey SE, Young AA, et al. (2004)  
513 Pharmacy-based assessment of adherence to HAART predicts virological and  
514 immunologic treatment response and clinical progression to AIDS and death. *Int J STD*  
515 *AIDS* 15: 803-810.
- 516 6. Wood E, Hogg RS, Yip B, Harrigan PR, O'Shaughnessy MV, et al. (2003) Effect of  
517 medication adherence on survival of HIV-infected adults who start highly active  
518 antiretroviral therapy when the CD4+ cell count is 0.200 to 0.350 × 10<sup>9</sup> cells/L. *Ann*  
519 *Intern Med* 139: 810-816.
- 520 7. Bangsberg DR, Perry S, Charlebois ED, Clark RA, Roberston M, et al. (2001)  
521 Nonadherence to highly active antiretroviral therapy predicts progression to AIDS. *AIDS*  
522 15: 1181-1183.

- 1  
2  
3 523 8. Paterson DL, Swindells S, Mohr J, Brester M, Vergis EN, et al. (2000) Adherence to  
4  
5 524 protease inhibitor therapy and outcomes in patients with HIV infection. *Ann Intern Med*  
6  
7 525 133: 21-30.
- 8  
9  
10 526 9. Panel on Antiretroviral Guidelines for Adults and Adolescents, Department of Health and  
11  
12 527 Human Services (2009) Guidelines for the Use of Antiretroviral Agents in HIV-1-  
13  
14 528 Infected Adults and Adolescents. Available:  
15  
16 529 <http://www.aidsinfo.nih.gov/contentfiles/AdultandAdolescentGL001419.pdf>. Accessed  
17  
18 530 2012 Aug 25.
- 19  
20  
21 531 10. DeJesus E, Young B, Morales-Ramirez JO, Sloan L, Ward DJ, et al. (2009)  
22  
23 532 Simplification of antiretroviral therapy to a single tablet regimen consisting of efavirenz,  
24  
25 533 emtricitabine and tenofovir disoproxil fumarate versus unmodified antiretroviral therapy  
26  
27 534 in virologically suppressed HIV-1-infected patients. *J Acquir Immune Defic Syndr*  
28  
29 535 51: 163-174.
- 30  
31  
32 536 11. Hodder SL, Mounzer K, DeJesus E, Ebrahimi R, Grimm K, et al. (2010) Patient-reported  
33  
34 537 outcomes in virologically suppressed, HIV-1-infected subjects after switching to a  
35  
36 538 simplified, single tablet regimen of efavirenz, emtricitabine and tenofovir DF. *AIDS*  
37  
38 539 *Patient Care STDs* 24: 115-125.
- 39  
40  
41 540 12. Airoidi M, Zaccarelli M, Bisi L, Bini T, Antinori A, et al. (2010) One-pill once-a-day  
42  
43 541 HAART: a simplification strategy that improves adherence and quality of life of HIV-  
44  
45 542 infected subjects. *Patient Prefer Adherence* 4: 115-125.
- 46  
47  
48 543 13. Bangsberg DR, Ragland K, Monk A, Deeks SG (2010) A single tablet regimen is  
49  
50 544 associated with higher adherence and viral suppression than multiple tablet regimens in  
51  
52 545 HIV+ homeless and marginally housed people. *AIDS* 24: 2835-2840.
- 53  
54  
55  
56  
57  
58  
59  
60

- 1  
2  
3 546 14. Sax PE, Meyers JL, Mugavero M, Davis KL (2012) Adherence to antiretroviral treatment  
4  
5 547 and correlation with risk of hospitalization among commercially insured HIV patients in  
6  
7 548 the United States. PLoS One 7 (2): e31591.  
8  
9  
10 549 15. Charlson ME, Pompei P, Ales KL, McKenzie CR (1987) A new method of classifying  
11  
12 550 prognostic comorbidity in longitudinal studies: development and validation. J Chron Dis  
13  
14 551 40: 373-383.  
15  
16  
17 552 16. Andrade SE, Kristijan KH, Frech F, Chan K (2006) Methods for evaluation of medication  
18  
19 553 adherence and persistence using automated databases. Pharmacoepidemiol Drug Saf  
20  
21 554 15: 565-574.  
22  
23  
24 555 17. Legorreta A, Yu A, Chernicoff H, Gilmore A, Jordan J, et al. (2005) Adherence to  
25  
26 556 combined lamivudine + zidovudine versus individual components: a community-based  
27  
28 557 retrospective Medicaid claims analysis. AIDS Care 17: 938-948.  
29  
30  
31 558 18. Fielden SJ, Rusch ML, Yip B, Wood E, Shannon K, et al. (2008) Nonadherence increases  
32  
33 559 the risk of hospitalization among HIV-infected antiretroviral naïve patients started on  
34  
35 560 HAART. J Int Assoc Physicians AIDS Care 7: 238-244.  
36  
37  
38 561 19. Juday T, Gupta S, Grimm K, Wagner S, Kim E (2011) Factors associated with complete  
39  
40 562 adherence to HIV combination antiretroviral therapy. HIV Clin Trials 12: 71-78.  
41  
42  
43 563 20. Cohen CJ, Davis KL, Meyers J. Association of partial adherence to antiretroviral therapy  
44  
45 564 with hospitalizations and healthcare costs in an HIV population. Poster presented at the  
46  
47 565 11th International Congress on Drug Therapy in HIV Infection; November 2012.  
48  
49 566 Glasgow, United Kingdom.  
50  
51  
52 567 21. Burman W, Clumeck N, Cohen CJ, Cohn D, Cooper D, et al. (2006) CD4+ count-guided  
53  
54 568 interruption of antiretroviral treatment. N Eng J Med 355 (22): 2283-2296.  
55  
56  
57  
58  
59  
60



- 1  
2  
3 569 22. Cohen CJ, Colson AE, Pierone G, DeJesus E, Kinder F, Elion R, Skiest D, Habel A,  
4  
5 570 Jensen J, J Garb, Schragr HS. The FOTO study: 24-week results support the safety of a  
6  
7 571 2-day break on efavirenz-based antiretroviral therapy. *Journal of the International AIDS*  
8  
9 572 *Society* 2008;11 (Suppl. 1):019.
- 10  
11  
12 573 23. Parienti J-J, Bangsberg DR, Verdon R, Gardner EM (2009) Better adherence with once-  
13  
14 574 daily antiretroviral regimens: a meta-analysis. *Clin Infect Dis* 48: 484-488.
- 15  
16  
17 575 24. McMahon JH, Jordan MR, Kelley K, Bertagnolio S, Hong SY, et al. (2011) Pharmacy  
18  
19 576 adherence measures to assess adherence to antiretroviral therapy: review of the literature  
20  
21 577 and implications for treatment monitoring. *Clin Infect Dis* 52: 493-506.
- 22  
23  
24 578 25. Daar ES, Tierney C, Fischl MA, Sax PE, Mollan K, et al. (2011) Atazanavir plus  
25  
26 579 ritonavir or efavirenz as part of a 3-drug regimen for initial treatment of HIV-1. *Ann*  
27  
28 580 *Intern Med* 154: 445-456.
- 29  
30  
31 581 26. Riddler SA, Haubrich R, DiRienzo AG, Peoples L, Powderly WG, et al. (2008) Class-  
32  
33 582 sparing regimens for initial treatment of HIV-1 infection. *N Engl J Med* 358: 2095-2106.
- 34  
35  
36 583 27. Hellinger FJ, Encinosa WE (2010) The cost and incidence of prescribing errors among  
37  
38 584 privately insured HIV patients. *Pharmacoeconomics* 28: 23-34.
- 39  
40  
41  
42  
43  
44  
45  
46  
47  
48  
49  
50  
51  
52  
53  
54  
55  
56  
57  
58  
59  
60

1  
2  
3  
4  
5  
6  
7  
8  
9  
10  
11  
12  
13  
14  
15  
16  
17  
18  
19  
20  
21  
22  
23  
24  
25  
26  
27  
28  
29  
30  
31  
32  
33  
34  
35  
36  
37  
38  
39  
40  
41  
42  
43  
44  
45  
46  
47  
48  
49  
50  
51  
52  
53  
54  
55  
56  
57  
58  
59  
60

585 **FIGURE LEGENDS**

586 **Figure 1. Sample Selection Flow Chart**

587 **Figure 2. Adjusted Rate of Hospitalizations per 100 Patient-years, by Cohort**

588 **Figure 3. Adjusted Monthly Health Care Costs, by Cohort**

For peer review only

1  
2  
3  
4  
5  
6  
7  
8  
9  
10  
11  
12  
13  
14  
15  
16  
17  
18  
19  
20  
21  
22  
23  
24  
25  
26  
27  
28  
29  
30  
31  
32  
33  
34  
35  
36  
37  
38  
39  
40  
41  
42  
43  
44  
45  
46  
47  
48  
49  
50  
51  
52  
53  
54  
55  
56  
57  
58  
59  
60

For peer review only

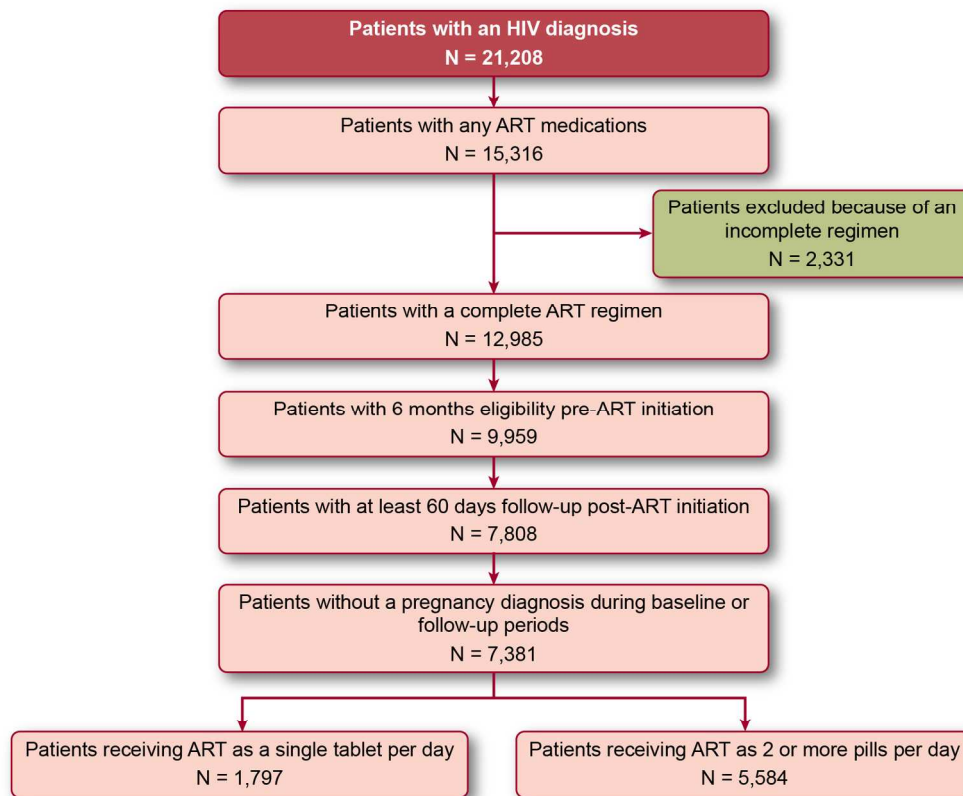

Figure 1. Sample Selection Flow Chart  
159x131mm (300 x 300 DPI)

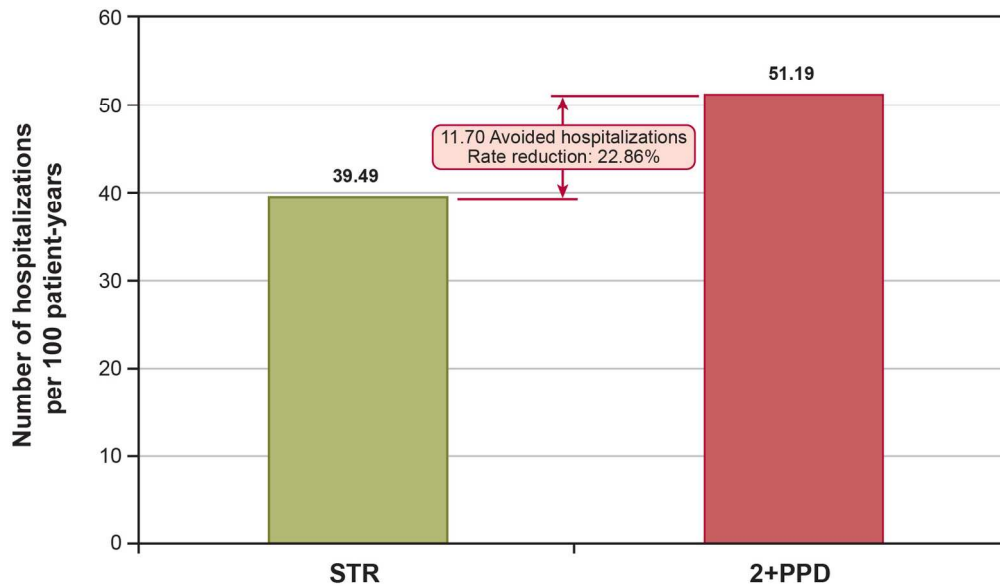

Figure 2. Adjusted Rate of Hospitalizations per 100 Patient-years, by Cohort  
152x89mm (300 x 300 DPI)

review only

1  
2  
3  
4  
5  
6  
7  
8  
9  
10  
11  
12  
13  
14  
15  
16  
17  
18  
19  
20  
21  
22  
23  
24  
25  
26  
27  
28  
29  
30  
31  
32  
33  
34  
35  
36  
37  
38  
39  
40  
41  
42  
43  
44  
45  
46  
47  
48  
49  
50  
51  
52  
53  
54  
55  
56  
57  
58  
59  
60

1  
2  
3  
4  
5  
6  
7  
8  
9  
10  
11  
12  
13  
14  
15  
16  
17  
18  
19  
20  
21  
22  
23  
24  
25  
26  
27  
28  
29  
30  
31  
32  
33  
34  
35  
36  
37  
38  
39  
40  
41  
42  
43  
44  
45  
46  
47  
48  
49  
50  
51  
52  
53  
54  
55  
56  
57  
58  
59  
60

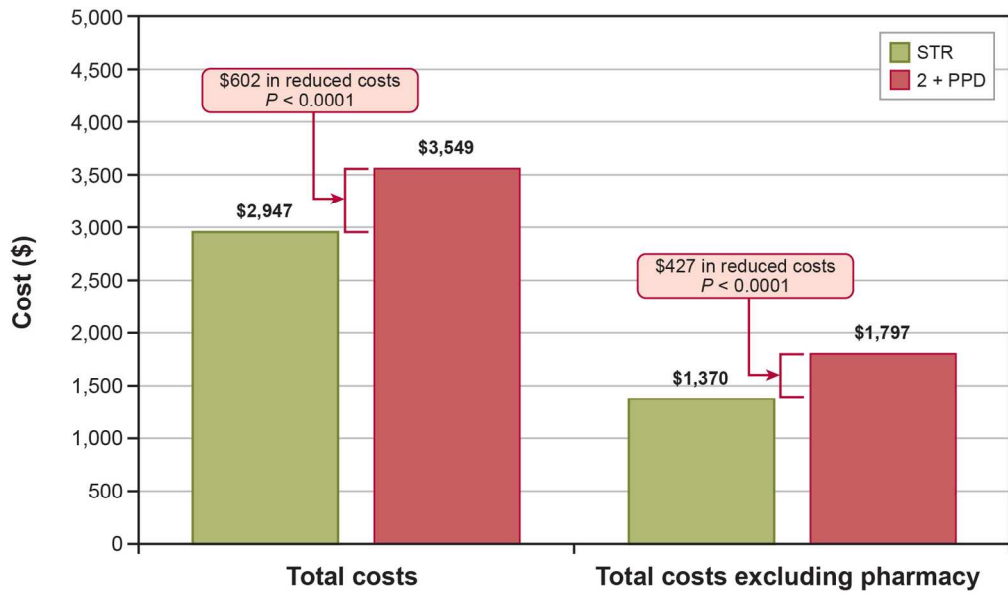

Figure 3. Adjusted Monthly Health Care Costs, by Cohort  
152x89mm (300 x 300 DPI)

review only

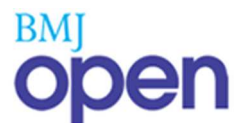

**Association between Daily Antiretroviral Pill Burden and Treatment Adherence, Hospitalization Risk, and Other Health Care Utilization and Costs in a United States Medicaid Population with HIV**

|                                 |                                                                                                                                                                         |
|---------------------------------|-------------------------------------------------------------------------------------------------------------------------------------------------------------------------|
| Journal:                        | <i>BMJ Open</i>                                                                                                                                                         |
| Manuscript ID:                  | bmjopen-2013-003028.R1                                                                                                                                                  |
| Article Type:                   | Research                                                                                                                                                                |
| Date Submitted by the Author:   | 10-Jun-2013                                                                                                                                                             |
| Complete List of Authors:       | Cohen, Calvin; CRI New England, Harvard Medical School, Meyers, Juliana; RTI Health Solutions, Health Economics<br>Davis, Keith; RTI Health Solutions, Health Economics |
| <b>Primary Subject Heading</b>: | HIV/AIDS                                                                                                                                                                |
| Secondary Subject Heading:      | Health economics, Health services research                                                                                                                              |
| Keywords:                       | HIV & AIDS < INFECTIOUS DISEASES, HEALTH ECONOMICS, THERAPEUTICS                                                                                                        |
|                                 |                                                                                                                                                                         |

SCHOLARONE™  
Manuscripts

1  
2  
3  
4 1 **Association between Daily Antiretroviral Pill Burden and Treatment**  
5  
6 2 **Adherence, Hospitalization Risk, and Other Health Care Utilization**  
7  
8  
9 3 **and Costs in a United States Medicaid Population with HIV**  
10  
11  
12  
13 4

14  
15 5 **Short Title:** Antiretroviral Pill Burden in Medicaid Patients  
16  
17 6

18  
19  
20 7 **Authors and Affiliations:** Calvin Cohen,<sup>1</sup> Juliana L. Meyers,<sup>2</sup> Keith L. Davis<sup>2</sup>  
21

22 8 <sup>1</sup> CRI New England, Harvard Medical School, Boston, MA, USA  
23

24 9 <sup>2</sup> RTI Health Solutions, Research Triangle Park, NC, USA  
25  
26  
27 10

28  
29 11 **Key Words:** HIV, Medicaid, Adherence, Hospitalization, Health Care Utilization  
30  
31 12

32  
33  
34 13 **Word Count:** 5,453  
35  
36 14

37  
38 15 **Corresponding Author**  
39

40 16 Keith L. Davis, MA  
41  
42

43 17 RTI Health Solutions  
44

45 18 200 Park Offices Drive  
46  
47

48 19 Research Triangle Park, NC 27709 USA  
49

50 20 Telephone: 1.919.541.1273  
51

52 21 Fax: +1.919.541.7222  
53  
54

55 22 E-mail: kldavis@rti.org  
56  
57  
58  
59  
60



1  
2  
3 **ABSTRACT**  
4  
5

6 **Objectives:** Lower pill burden leads to improved antiretroviral therapy (ART) adherence  
7  
8 among human immunodeficiency virus (HIV) patients. Simpler dosing regimens have not been  
9  
10 widely explored in real-world populations. We retrospectively assessed ART adherence, all-  
11  
12 cause hospitalization risk and costs, and other health care utilization and costs in Medicaid  
13  
14 enrollees with HIV treated with ART as a once-daily single-tablet regimen (STR) or two or more  
15  
16 pills per day (2+PPD).  
17  
18  
19

20 **Design:** Patients with an HIV diagnosis from 2005-2009 receiving complete ART (i.e., 2  
21  
22 nucleoside/nucleotide reverse transcriptase inhibitors plus a third agent) for  $\geq 60$  days as STR or  
23  
24 2+PPD were selected and followed until the first of (1) discontinuation of the complete ART, (2)  
25  
26 loss of enrollment, or (3) end of database. Adherence was measured using the medication  
27  
28 possession ratio. Monthly all-cause health care utilization and costs were observed from regimen  
29  
30 initiation until follow-up end.  
31  
32  
33

34 **Results:** Of the 7,381 patients who met inclusion criteria, 1,797 were treated with STR and  
35  
36 5,584 with 2+PPD. STR patients were significantly more likely to reach 95% adherence and had  
37  
38 fewer hospitalizations than 2+PPD patients (both  $P < 0.01$ ). STR patients had mean (SD) total  
39  
40 monthly costs of \$2,959 (\$4,962); 2+PPD patients had \$3,544 (\$5,811) ( $P < 0.001$ ). Hospital costs  
41  
42 accounted for 53.8% and pharmacy costs accounted for 32.5% of this difference. Multivariate  
43  
44 analyses found that STR led to a 23% reduction in hospitalizations and a 17% reduction in  
45  
46 overall health care costs. ART adherence appears to be a key mechanism mediating  
47  
48 hospitalization risk, as patients with  $\geq 95\%$  adherence (regardless of regimen type) had a lower  
49  
50 hospitalization rate compared with  $< 95\%$  adherence.  
51  
52  
53  
54  
55  
56  
57  
58  
59  
60

1  
2  
3 45 **Conclusions:** While it was expected that STR patients would have lower pharmacy costs, we  
4  
5  
6 46 also found that STR patients had fewer hospitalizations and lower hospital costs than 2+PPD  
7  
8 47 patients, resulting in significantly lower total health care costs for STR patients.  
9  
10  
11  
12  
13  
14  
15  
16  
17  
18  
19  
20  
21  
22  
23  
24  
25  
26  
27  
28  
29  
30  
31  
32  
33  
34  
35  
36  
37  
38  
39  
40  
41  
42  
43  
44  
45  
46  
47  
48  
49  
50  
51  
52  
53  
54  
55  
56  
57  
58  
59  
60

For peer review only

## ARTICLE SUMMARY

### Article Focus

- To assess the association between a single-tablet-per-day ART regimen (STR) and treatment adherence, all-cause hospitalization risk, and other all-cause health care utilization and costs in a large population of Medicaid enrollees in the United States who received treatment for HIV infection

### Key Messages

- Patients who received ART as a single pill per day were significantly more likely to be highly adherent ( $\geq 95\%$ ) to therapy than patients who received multiple-pill regimens.
- Improved adherence among patients treated with STR conferred a lower risk of hospitalization.
- The use of an STR may reduce health care costs as well as patient morbidity by decreasing hospitalization rates, which were higher in patients with less-than-complete medication adherence.

### Strengths and Limitations of This Study

- This retrospective analysis used pharmacy refill dates as the best available proxy for pill-taking behavior; one advantage to this method is that we can identify those patients who may not have had all or some of their medications available on any given date based on an analysis the timing in between refills, which also notes the amount of medication dispensed each time.
- Rates of hospitalization and correlates of hospitalization also were assessed from these claims data and should be highly accurate, as should measures of overall monthly health care utilization and costs.

- 1  
2  
3 71     ▪ While our prescription claims-based measure of adherence has been found to be a valid  
4  
5 72     proxy for actual medication-taking behavior, we had no measure of actual patient  
6  
7 73     adherence (i.e., daily ingestion/consumption) to the prescriptions they filled.  
8  
9  
10 74     ▪ Because we did not randomize patients to the two different treatment regimens, we  
11  
12 75     cannot exclude unmeasured confounding factors that may have influenced our outcomes;  
13  
14 76     although we attempted to control for some of these variables through the use of  
15  
16 77     multivariable models that included some of these factors (substance abuse and psychiatric  
17  
18 78     diagnoses), residual confounding may remain.  
19  
20  
21  
22 79     ▪ We had no laboratory results from patients and thus cannot confirm the degree of  
23  
24 80     virologic suppression obtained across the regimens.  
25  
26  
27  
28  
29  
30  
31  
32  
33  
34  
35  
36  
37  
38  
39  
40  
41  
42  
43  
44  
45  
46  
47  
48  
49  
50  
51  
52  
53  
54  
55  
56  
57  
58  
59  
60

## 81 **ADMINISTRATIVE STATEMENTS**

### 82 **Protection of Human Subjects**

83 The research organization that conducted this study, RTI Health Solutions, a business unit of  
84 RTI International (RTI), holds a Federal-Wide Assurance (FWA #3331 effective until June 17,  
85 2014) from the Department of Health and Human Services (DHHS) Office for Human Research  
86 Protections (OHRP) that allows us to review and approve human subjects protocols through our  
87 Institutional Review Board (IRB) committees. Since pre-existing, retrospective, de-identified  
88 patient data were analyzed for this study, which involved no patient contact or medical  
89 interventions and therefore no patient consent forms, the RTI IRB committee approved this study  
90 as exempt.

### 91 **Author Contributions**

92 Calvin Cohen assisted in development of the study design, evaluated and interpreted the  
93 study results, and drafted and critically revised the manuscript text. Juliana Meyers and Keith  
94 Davis assisted in development of the study design, obtained study funding, conducted all analytic  
95 programming and statistical analyses, assisted with evaluation and interpretation of the study

### 96 **Funding Statement**

97 This study was funded by Gilead Sciences, which is conducting clinical research in and  
98 markets current treatments for HIV/AIDS.

### 99 **Data Sharing**

100 Raw data used for this study are unavailable for public sharing (per terms of the private data  
101 use agreement governing original data acquisition).

### 102 **Acknowledgments**

103 The Authors would like to thank Francois Everhard (Gilead Sciences) for his support and  
104 input on the study design and manuscript.

## 105 INTRODUCTION

106 The 2012 Department of Health and Human Services guidelines state that there are four  
107 preferred regimens for initiating human immunodeficiency virus (HIV) treatment in adults.  
108 Furthermore, there are multiple alternatives to these four regimens.[1] Patients and their treating  
109 physicians can choose from among these four preferred regimens, using the criteria of greatest  
110 efficacy, safety, and simplicity. The latter category is important because regimen simplicity is  
111 associated with greater long-term adherence. For example, all four preferred regimens are  
112 constructed with a relatively low pill burden (i.e., between one and four tablets per day), and  
113 three of the four regimens have once-daily dosing. While randomized trials have compared the  
114 components of some of these four regimens with each other, to date no studies compared the four  
115 regimens to each other as they are prescribed (i.e., in a real-world setting), given that these study  
116 trials have been blinded.[2,3]

117 Adherence to antiretroviral therapy (ART) is essential for achieving durable clinical  
118 outcomes in patients with HIV. Patients with inadequate adherence to ART are at an increased  
119 risk for incomplete viral suppression; and unless a new suppressive regimen is quickly  
120 constructed to reestablish virologic suppression, viremia is associated with an increased risk of  
121 disease progression and death.[4-8] It has been suggested that an ART adherence rate of at least  
122 95% is required to achieve a lower risk of virologic failure, fewer hospital days, and reduced  
123 morbidity and mortality in patients with HIV[8-9], although one previous study indicated that  
124 viral suppression may be possible at less than 95% adherence.[10] In the past several years, the  
125 availability of fixed-dose combinations and agents with prolonged half-lives have simplified pill  
126 burden and thus increased regimen adherence.[1,11] Several clinical trials and cohort studies  
127 support the conclusion that once-daily single tablet regimens (STR) can lead to significantly  
128 improved adherence, patient satisfaction, and virological outcomes.[12-15] For example, among

1  
2  
3 129 homeless or marginally housed patients, those receiving an ART regimen composed of a single  
4  
5  
6 130 tablet per day had better virologic outcomes and a 26% increase in adherence than patients  
7  
8 131 receiving other multi-pill regimens.[15] One recently published study analyzing a claims  
9  
10 132 database noted that compared with various multi-pill regimens, a STR was associated with  
11  
12 133 increased adherence (as determined by pharmacy refill data). Furthermore, the increased  
13  
14 134 likelihood of complete adherence was associated with a 25% decrease in the rate of  
15  
16 135 hospitalization.[16]

17  
18  
19  
20 136 In this study, we sought to assess how robust these findings were by analyzing similar  
21  
22 137 metrics in a separate data set. The primary objective of this retrospective database analysis was  
23  
24 138 to assess the association between a single-tablet-per-day ART regimen and treatment adherence,  
25  
26 139 all-cause hospitalization risk, and total all-cause health care costs in a large population of  
27  
28 140 Medicaid enrollees in the United States (US) who received treatment for HIV infection. The  
29  
30 141 secondary objective of this study was to examine the association between STR and other types of  
31  
32 142 all-cause health care utilization (emergency department, pharmacy, outpatient, and other service  
33  
34 143 types) and costs.  
35  
36  
37  
38  
39  
40  
41  
42  
43  
44  
45  
46  
47  
48  
49  
50  
51  
52  
53  
54  
55  
56  
57  
58  
59  
60

1  
2  
3 144 **METHODS**  
4  
5

6 145 Data for this analysis were taken from the MarketScan Medicaid Multi-State Database,  
7  
8 146 which contains health care claims from approximately 30 million Medicaid enrollees from  
9  
10 147 11 geographically dispersed states. The database includes patient-level demographics; periods of  
11  
12 148 Medicaid enrollment; primary and secondary diagnoses; and detailed information about  
13  
14 149 hospitalizations and therapeutic procedures, inpatient and outpatient physician services, and  
15  
16 150 prescription drug use. Each medical and pharmacy claim in the database also includes original  
17  
18 151 cost information, which represents direct paid amounts (in US dollars) from Medicaid to  
19  
20 152 providers for each service or prescription. In compliance with the Health Insurance and  
21  
22 153 Portability and Accountability Act of 1996, all data were de-identified to protect the privacy of  
23  
24 154 individual patients, physicians, and hospitals. Because the data were retrospective, pre-existing,  
25  
26 155 and de-identified, RTI International's institutional review board determined that this study met  
27  
28 156 all criteria for exemption from requirements of patient consent.  
29  
30  
31  
32  
33

34 157 Patients were selected for inclusion if they received at least one HIV or AIDS diagnosis  
35  
36 158 (*International Classification of Diseases, 9th Revision, Clinical Modification* [ICD-9-CM] code  
37  
38 159 042.xx) between June 1, 2006, and December 31, 2009. Patients also were required to have  
39  
40 160 evidence of receipt of a complete ART regimen, defined as two nucleoside/nucleotide reverse  
41  
42 161 transcriptase inhibitors plus a third agent (i.e., another nucleoside/nucleotide reverse  
43  
44 162 transcriptase inhibitor, a nonnucleoside/nucleotide reverse transcriptase inhibitor, a protease  
45  
46 163 inhibitor [PI], a chemokine receptor R5 antagonist, or an integrase inhibitor). The first date of  
47  
48 164 receipt of a complete regimen was termed the index date. ART agents were identified in the  
49  
50 165 claims database by using National Drug Codes associated with relevant generic and brand  
51  
52 166 names. Patients also were required to remain on the complete ART regimen for at least 60 days  
53  
54 167 following their index dates and to have evidence of continuous enrollment in Medicaid during  
55  
56  
57  
58  
59  
60



1  
2  
3 168 this period. To assess treatment-naïve versus experienced status and baseline comorbidities,  
4  
5 169 patients were required to have at least 6 months of pre-index date Medicaid enrollment, with  
6  
7  
8 170 enrollment information available from January 1, 2006 (i.e., 6 months before the earliest possible  
9  
10 171 index date).

11  
12  
13 172 Patients were grouped into two mutually exclusive cohorts according to the daily pill count  
14  
15 173 of their complete ART regimen. Patients were assigned to the STR cohort if they received an  
16  
17 174 ART regimen consisting of a single tablet (i.e., an STR) at any point during the selection  
18  
19  
20 175 window, regardless of prior or subsequent use of other regimens. At the time of this study, only  
21  
22 176 coformulated tenofovir/emtricitabine/efavirenz was available as an STR. Patients were assigned  
23  
24 177 to the two-or-more-pills-per-day (2+PPD) cohort if they received a regimen consisting of two or  
25  
26  
27 178 more pills per day during the selection window and if they did not receive an STR at any point  
28  
29 179 during that time.

30  
31  
32 180 Patients were followed from the start of their complete ART regimen (i.e., after June 1, 2006,  
33  
34 181 the study index date) until the earliest date of regimen discontinuation, disenrollment from the  
35  
36 182 health plan, or the end of the database (i.e., March 31, 2009). Furthermore, patients receiving  
37  
38  
39 183 2+PPD were allowed to change medications comprising the regimen, provided that the patients  
40  
41 184 continued to receive a combination of agents that could still be classified as a complete 2+PPD  
42  
43 185 regimen. Patients receiving STR were followed for as long as they remained on the STR.  
44  
45  
46 186 Discontinuation was defined as 60 consecutive days in which no refills were observed for any  
47  
48 187 component of the regimen. Females with an ICD-9-CM diagnosis code indicating a pregnancy  
49  
50 188 during the follow-up period were excluded from the analysis because the one available STR is  
51  
52  
53 189 not recommended for pregnant women, and hospitalizations for labor and delivery may have  
54  
55 190 biased results in favor of the STR.  
56  
57  
58  
59  
60

1  
2  
3 191 Patient characteristics measured at the index date included age, sex, and ART classes  
4  
5  
6 192 received (i.e., nucleoside/nucleotide reverse transcriptase inhibitors, nonnucleoside/nucleotide  
7  
8 193 reverse transcriptase inhibitors, PIs, ritonavir boosting therapy, or other therapies). The presence  
9  
10 194 of comorbid medical conditions other than HIV or AIDS were assessed during the 6-month pre-  
11  
12 195 index period, using an established algorithm, the Charlson Comorbidity Index (CCI) score.[17]  
13  
14  
15 196 This score is made up of 17 comorbidities (defined by ICD-9-CM diagnosis and procedure  
16  
17 197 codes), such as myocardial infarction and chronic pulmonary disease, which are weighted to  
18  
19 198 correspond to the severity of the comorbid condition of interest. A higher comorbidity score  
20  
21 199 represents a higher overall comorbidity burden during the pre-index period. Additionally, the  
22  
23 200 incidence of other concomitant mental disorders (ICD-9-CM codes 306.xx through 319.xx) and  
24  
25 201 drug and alcohol abuse (ICD-9-CM codes 292.xx and 303.xx through 305.xx) during the 6-  
26  
27 202 month pre-index period also was assessed.  
28  
29  
30

31 203 Medication adherence was assessed using the medication possession ratio (MPR), which has  
32  
33 204 been shown to be the most widely adopted measure (57% of all studies) in published claims-  
34  
35 205 based analyses of medication adherence [18] and has been used in studies of ART adherence  
36  
37 206 among individuals with HIV.[19] The MPR, which is a proxy for refill compliance, generally  
38  
39 207 measures the proportion of the ART exposure period in which supply was maintained for all  
40  
41 208 ART components comprising the regimen. Specifically, MPR was calculated as the number of  
42  
43 209 filled prescription days for all ART regimen components (using the days supplied in the  
44  
45 210 pharmacy claims) divided by the number of days from the first observed prescription in the  
46  
47 211 regimen through the earliest of either the exhaustion of the days supplied of the last observed  
48  
49 212 prescription or the end of follow-up. For each patient in our study, the MPR was calculated over  
50  
51 213 the period in which the patient remained on his or her ART regimen. For patients in the 2+PPD  
52  
53 214 cohort, late refills and resulting days of missing supply for one or more ART components were  
54  
55  
56  
57  
58  
59  
60

1  
2  
3 215 all factored against their adherence measurements. For example, patients in the 2+PPD cohort  
4  
5  
6 216 with a supply for only one of the ART components on a given day were considered to have zero  
7  
8 217 adherence for that day. In addition to reporting the mean (standard deviation [SD]) MPR  
9  
10 218 achieved, we also reported the numbers and percentages of patients achieving various adherence  
11  
12 219 thresholds (i.e., MPRs of 1.0-0.95, 0.94-0.90, 0.89-0.85, and 0.84-0.80, corresponding to 100%-  
13  
14 220 95%, 94%-90%, 89%-85%, and 84%-80% adherence, respectively).

15  
16  
17 221 To further understand adherence to ART regimens, for each patient in the 2+PPD cohort,  
18  
19 222 complete (i.e., having a complete regimen), partial (i.e., receiving some but not all components  
20  
21 223 of a complete regimen), and no medication days also were assessed. Specifically, we reported the  
22  
23 224 percentage of days that each patient had complete, partial, and no medications available, along  
24  
25 225 with the mean number of days that the patient had complete, partial and no medications.  
26  
27 226 Additionally, we also reported the maximum number of consecutive days the patient had either  
28  
29 227 an incomplete regimen or no medications available.

30  
31  
32 228 Hospitalizations were identified from the claims database using relevant place of service  
33  
34 229 codes. Hospitalizations were observed from the index date until the earliest date of regimen  
35  
36 230 discontinuation, end of enrollment in the health plan, or end of the database. The number and  
37  
38 231 percentage of patients with at least one hospitalization were reported, along with the mean (SD)  
39  
40 232 number of hospitalizations, and the mean (SD) number of inpatient days. Furthermore, we  
41  
42 233 compared and reported the number of hospitalizations per 100 patient-years, along with the rate  
43  
44 234 ratios and 95% confidence intervals, for both cohorts as well as by adherence status (at least 95%  
45  
46 235 vs. less than 95%).

47  
48  
49 236 For each patient, overall health care utilization and associated costs were aggregated across  
50  
51 237 all encounters, regardless of reason, that were observed during the follow-up period; we reported  
52  
53 238 these costs by average and per-month amounts. The following categories of overall health care  
54  
55  
56  
57  
58  
59  
60

1  
2  
3 239 utilization and costs were evaluated and reported: inpatient, emergency department, office visit,  
4  
5  
6 240 home health visit, laboratory service, pharmacy, other outpatient care, and total. For each  
7  
8 241 category of overall health care, the number and percentage of patients, the mean (SD) number of  
9  
10 242 visits per month, and monthly per-patient costs were reported. Additionally, for patients with an  
11  
12 243 inpatient visit, the average number of inpatient days per month among patients with at least one  
13  
14  
15 244 stay during follow-up also was reported. All cost data, which represented payments incurred by  
16  
17 245 the Medicaid system, were standardized at the claim level to 2010 US dollars using the medical  
18  
19  
20 246 care component of the US Consumer Price Index.

21  
22 247 All analyses were carried out using SAS (version 9; Cary, North Carolina) statistical  
23  
24 248 software. Descriptive analyses were conducted for all outcome measures and included means and  
25  
26  
27 249 SDs for continuous variables of interest (e.g., MPR) and frequency distributions of categorical  
28  
29 250 variables of interest (e.g., geographic region). All descriptive analyses were stratified by cohort.  
30  
31 251 Health care costs were updated to 2010 US dollars using the medical care component of the  
32  
33  
34 252 consumer price index.

35  
36 253 A generalized linear model with a log link and a Poisson distribution was estimated to assess  
37  
38 254 the relationship between the number of pills per day and the number of hospitalizations observed  
39  
40  
41 255 during follow-up. The dependent variable was a count of hospitalizations during exposure to the  
42  
43 256 ART regimen. Additionally, a generalized linear model with a log link and a negative binomial  
44  
45  
46 257 distribution were estimated to assess monthly health care costs, adjusted for the patient and  
47  
48 258 treatment characteristics. The dependent variables were monthly total costs and monthly total  
49  
50 259 costs excluding costs pharmacy costs. For both models, based on previous work by Sax et al.  
51  
52  
53 260 [16], independent variables included the following: treatment regimen received (i.e., STR vs.  
54  
55 261 2+PPD), age, sex, CCI score, treatment-naïve status, pre-index presence of mental health  
56  
57  
58 262 disorders, pre-index presence of alcohol or drug abuse disorders, length of follow-up (in days,  
59  
60

1  
2  
3 263 hospital model only), and whether or not the patient met a 0.95 adherence threshold (cost model  
4  
5  
6 264 only). For the hospital model, incidence rate ratios (IRRs) were reported for all covariates, along  
7  
8 265 with the mean predicted number of hospitalizations for patients receiving an STR versus patients  
9  
10 266 receiving a 2+PPD. For the cost model, adjusted predicted mean costs were reported.  
11  
12  
13  
14  
15  
16  
17  
18  
19  
20  
21  
22  
23  
24  
25  
26  
27  
28  
29  
30  
31  
32  
33  
34  
35  
36  
37  
38  
39  
40  
41  
42  
43  
44  
45  
46  
47  
48  
49  
50  
51  
52  
53  
54  
55  
56  
57  
58  
59  
60

## 267 RESULTS

268 A total of 7,381 patients met the selection criteria (Figure 1). Of these, 5,584 patients  
 269 (75.7%) received their ART regimen as 2+PPD; 1,797 patients (24.3%) received their ART  
 270 regimen as a STR. On average, patients were approximately 42 years of age. Approximately  
 271 46% of patients were female (Table 1). Across both cohorts, the average CCI score was  
 272 approximately the same (mean [SD]: 0.67 [1.38] among patients receiving an STR and 0.65  
 273 [1.36] among patients receiving 2+PPD). Furthermore, the incidence of concomitant mental  
 274 disorders and drug and alcohol abuse diagnoses did not vary substantially by cohort. Patients  
 275 receiving an STR had a mean regimen duration of 348 days; this was approximately 2.8 months  
 276 shorter than the mean regimen duration of 433 days observed for patients receiving 2+PPD.  
 277 Forty-seven percent of patients receiving an STR were treatment naïve, compared with 24.5% of  
 278 patients receiving 2+PPD.

279 **Table 1. Characteristics of the study sample, by cohort.**

| Characteristic                       | STR<br>(n = 1,797) |         | 2+PPD<br>(n = 5,584) |         | P Value |
|--------------------------------------|--------------------|---------|----------------------|---------|---------|
| Age , mean (SD)                      | 41.6               | (10.56) | 42.32                | (11.37) | 0.0137  |
| Gender (N, %)                        |                    |         |                      |         |         |
| Male                                 | 945                | 52.59%  | 3,063                | 54.85%  | 0.1123  |
| Female                               | 852                | 47.41%  | 2,521                | 45.15%  | 0.1439  |
| Race (N, %)                          |                    |         |                      |         |         |
| White                                | 387                | 21.54%  | 1,221                | 21.87%  | 0.8893  |
| Black                                | 1,187              | 66.05%  | 3,658                | 65.51%  | 0.6877  |
| Hispanic                             | 18                 | 1.00%   | 82                   | 1.47%   | 0.7844  |
| Other                                | 204                | 11.35%  | 621                  | 11.12%  | 0.7846  |
| Unknown                              | 1                  | 0.06%   | 2                    | 0.04%   | 0.8766  |
| Basis of Medicaid Eligibility (N, %) |                    |         |                      |         |         |
| Aged                                 | 1                  | 0.06%   | 8                    | 0.14%   | 0.5634  |
| Disabled                             | 1,089              | 60.60%  | 4,071                | 72.90%  | <.0001  |
| Income                               | 583                | 32.44%  | 1,159                | 20.76%  | <.0001  |
| Other                                | 58                 | 3.23%   | 202                  | 3.61%   | 0.8710  |
| Unknown                              | 65                 | 3.62%   | 141                  | 2.53%   | 0.0487  |
| Medicare Eligibility (N, %)          |                    |         |                      |         |         |

| Characteristic                                                     | STR<br>(n = 1,797) |          | 2+PPD<br>(n = 5,584) |          | P Value |
|--------------------------------------------------------------------|--------------------|----------|----------------------|----------|---------|
|                                                                    | N                  | %        | N                    | %        |         |
| Not dually eligible                                                | 1,791              | 99.67%   | 5,558                | 99.53%   | 0.9987  |
| Dually eligible                                                    | 5                  | 0.28%    | 24                   | 0.43%    | 0.6523  |
| Unknown                                                            | 1                  | 0.05%    | 2                    | 0.04%    | 0.9014  |
| Charlson comorbidity index score, mean (SD)                        | 0.67               | (1.38)   | 0.65                 | (1.36)   | 0.5919  |
| Concomitant mental health and substance abuse comorbidities (N, %) |                    |          |                      |          |         |
| Mental disorders                                                   | 382                | 21.26%   | 1,340                | 24.00%   | 0.0456  |
| Drug or alcohol abuse                                              | 338                | 18.81%   | 856                  | 15.33%   | 0.0323  |
| Treatment naïve at index (N, %)                                    | 853                | 47.47%   | 1,366                | 24.46%   | <.0001  |
| Regimen length, mean (SD)                                          | 348.17             | (259.32) | 433.46               | (351.50) | <.0001  |
| Index medications (N, %)                                           |                    |          |                      |          |         |
| NRTI                                                               | 1,797              | 100.00%  | 5,584                | 100.00%  | ---     |
| NNRTI                                                              | 1,797              | 100.00%  | 1,500                | 26.86%   | <.0001  |
| PI                                                                 | ---                | ---      | 4,064                | 72.78%   | ---     |
| Kaletra at index                                                   | ---                | ---      | 1,633                | 40.18%   | ---     |
| Boosted PI at index                                                | ---                | ---      | 1,664                | 40.94%   | ---     |
| Non-boosted PI at index                                            | ---                | ---      | 767                  | 18.87%   | ---     |
| PE                                                                 | ---                | ---      | 1,712                | 30.66%   | ---     |
| Other                                                              | ---                | ---      | 87                   | 1.56%    | ---     |

NOTE. 2+PPD = two or more pills per day; NNRTI = nonnucleoside/nucleotide reverse transcriptase inhibitor; NRTI = nucleoside/nucleotide reverse transcriptase inhibitor; PE = pharmacokinetic enhancer; PI = protease inhibitor; SD = standard deviation; STR = once-daily single-tablet regimen.

Patients receiving an STR had significantly better adherence than patients receiving 2+PPD (Table 2). Approximately 25.3% of patients receiving an STR achieved 95% adherence or greater, compared with 17.4% of patients receiving 2+PPD ( $P \leq 0.0001$ ). Mean (SD) MPR was 0.84 (0.14) among patients receiving an STR and 0.80 (0.15) among patients receiving 2+PPD (Table 2). Patients in the 2+PPD cohort received a complete regimen for 80.3% of the follow-up period (mean [SD]: 361.9 [315.0] days), a partial regimen for 5.6% of the follow-up period (mean [SD]: 22.2 [45.6] days), and no available medications for 14.1% of the follow-up period (mean [SD]: 49.4 [57.1] days) (Table 3). Alternatively, patients in the STR cohort received a complete regimen for 84.4% of the follow-up period (mean [SD]: 299.4 [234.6] days) and no available medications for 15.6% of the follow-up period (mean [SD]: 48.8 [54.2] days), which



294 was a similar percentage of days as patients receiving 2+PPD. Patients receiving an STR had, on  
 295 average, a maximum of 19.5 (SD: 15.9) consecutive days without a complete regimen (i.e., either  
 296 a partial regimen or no medications available); patients receiving 2+PPD had, on average, a  
 297 maximum of 23.9 (SD: 16.7) consecutive days without a complete regimen.

298 **Table 2. Adherence to antiretroviral therapy, by cohort.**

| Cohort            | Number of Patients | Mean (SD) MPR | MPR/Persistence Ratio (N, %) |             |              |              |              |
|-------------------|--------------------|---------------|------------------------------|-------------|--------------|--------------|--------------|
|                   |                    |               | <0.8                         | 0.8 - <0.85 | 0.85 - <0.9  | 0.9 - <0.95  | 0.95 - 1     |
| STR               | 1,797              | 0.84 (0.14)   | 537 29.88%                   | 178 9.91%   | 243 13.52%   | 385 21.42%   | 454 25.26%   |
| 2+PPD             | 5,584              | 0.80 (0.15)   | 2,255 40.38%                 | 621 11.12%  | 779 13.95%   | 957 17.14%   | 972 17.41%   |
| Overall           | 7,381              | 0.81 (0.15)   | 2,792 37.83%                 | 799 10.83%  | 1,022 13.85% | 1,342 18.18% | 1,426 19.32% |
| P-Value (1 vs. 2) |                    | <.0001        | <.0001                       | 0.1491      | 0.6477       | <.0001       | <.0001       |

299 NOTE. 2+PPD = two or more pills per day; MPR = medication possession ratio; SD = standard deviation;  
 300 STR = once-daily single-tablet regimen.

301

302 **Table 3. Summary of incomplete adherence, by cohort.**

| Adherence Characteristic                                   | STR (n = 1,797) | 2+PPD (n = 5,584) | P Value |
|------------------------------------------------------------|-----------------|-------------------|---------|
| Percentage of days with complete adherence                 | 84.42%          | 80.37%            | <.0001  |
| Percentage of days with partial adherence                  | ---             | 5.56%             | ---     |
| Percentage of days with no ART medications                 | 15.58%          | 14.07%            | 0.0356  |
| Complete adherence days, mean (SD)                         | 299.36 (234.56) | 361.87 (315.03)   | <.0001  |
| Partial adherence days, mean (SD)                          | ---             | 22.24 (45.58)     | ---     |
| Days with no medication available, mean (SD)               | 48.81 (54.24)   | 49.35 (57.11)     | 0.0356  |
| Total follow-up duration, mean (SD)                        | 348.17 (259.31) | 433.46 (351.50)   | <.0001  |
| Maximum consecutive gap in therapy, <sup>a</sup> mean (SD) | 19.48 (15.89)   | 23.92 (16.67)     | <.0001  |

303 NOTE. 2+PPD = two or more pills per day; ART = antiretroviral therapy; SD = standard deviation; STR =  
 304 once-daily single-tablet regimen.

305 <sup>a</sup> Represents either days with a partial regimen or days with no medications.

306

307 Among patients receiving an STR, 21.0% had at least one hospitalization, compared with

308 24.4% of patients receiving 2+PPD ( $P = 0.003$ ) (Table 4). Among patients with a hospitalization,

309 patients receiving an STR had numerically similar, although significantly fewer, hospitalizations

310 over all available follow-up, when compared with patients receiving 2+PPD (mean [SD]: 1.9



311 [1.6] among patients receiving an STR vs. 2.1 [2.2] among patients receiving 2+PPD;  
 312  $P = 0.001$ ).

313 **Table 4. All-cause average per patient health care utilization and costs, by cohort.**

| Resource Used                                                          | STR<br>(n = 1,797) |           | 2+PPD<br>(n = 5,584) |           | P-Value |
|------------------------------------------------------------------------|--------------------|-----------|----------------------|-----------|---------|
| <b>Hospitalizations</b>                                                |                    |           |                      |           |         |
| Had $\geq 1$ hospital admission (N, %) <sup>a</sup>                    | 378                | 21.04%    | 1,365                | 24.44%    | 0.0031  |
| Number of hospitalizations (over all follow-up) <sup>b</sup> mean (SD) | 1.88               | (1.59)    | 2.1                  | (2.23)    | 0.0012  |
| Inpatient days (over all follow-up) <sup>b</sup> mean (SD)             | 9.99               | (12.33)   | 12.33                | (18.90)   | 0.0228  |
| Costs per month, mean (SD)                                             | \$834              | (\$4,480) | \$1,152              | (\$5,212) | 0.0203  |
| <b>Emergency Room (ER)</b>                                             |                    |           |                      |           |         |
| Had $\geq 1$ ER visit (N, %) <sup>a</sup>                              | 903                | 50.25%    | 2,749                | 49.23%    | 0.4517  |
| Number of visits per month, mean (SD)                                  | 0.97               | (3.00)    | 1.01                 | (2.99)    | 0.6107  |
| Costs per month, mean (SD)                                             | \$45               | (\$160)   | \$46                 | (\$135)   | 0.873   |
| <b>Office Visits (Primary Care) (N, %)</b>                             |                    |           |                      |           |         |
| Had $\geq 1$ office visit (N, %) <sup>a</sup>                          | 1,509              | 83.97%    | 4,699                | 84.15%    | 0.8576  |
| Number of visits per month, mean (SD)                                  | 1.52               | (3.00)    | 1.43                 | (2.19)    | 0.1669  |
| Costs per month, mean (SD)                                             | \$75               | (\$229)   | \$70                 | (\$291)   | 0.5087  |
| <b>Home Health (N, %)</b>                                              |                    |           |                      |           |         |
| Had $\geq 1$ home health visit (N, %) <sup>a</sup>                     | 504                | 28.05%    | 1,861                | 33.33%    | <.0001  |
| Number of visits per month, mean (SD)                                  | 0.64               | (3.00)    | 0.79                 | (3.16)    | 0.0625  |
| Costs per month, mean (SD)                                             | \$47               | (\$198)   | \$88                 | (\$642)   | 0.007   |
| <b>Laboratory (N, %)</b>                                               |                    |           |                      |           |         |
| Had $\geq 1$ lab order (N, %) <sup>a</sup>                             | 1,168              | 65.00%    | 3,530                | 63.22%    | 0.1722  |
| Number of lab tests per month, mean (SD)                               | 1.24               | (2.00)    | 1.19                 | (1.69)    | 0.2962  |
| Costs per month, mean (SD)                                             | \$52               | (\$94)    | \$46                 | (\$120)   | 0.0401  |
| <b>Pharmacy (N, %)</b>                                                 |                    |           |                      |           |         |
| Had $\geq 1$ pharmacy claim (N, %) <sup>a</sup>                        | 1,797              | 100.00%   | 5,584                | 100.00%   | ---     |
| Number of prescriptions per month, mean (SD)                           | 4.99               | (4.00)    | 6.73                 | (4.05)    | <.0001  |
| Costs per month, mean (SD)                                             | \$1,593            | (\$1,105) | \$1,779              | (\$1,307) | <.0001  |
| <b>OP/ancillary (N, %)</b>                                             |                    |           |                      |           |         |
| Had $\geq 1$ other OP/ancillary (N, %) <sup>a</sup>                    | 1,754              | 97.61%    | 5,469                | 97.94%    | 0.3957  |
| Number of visits per month, mean (SD)                                  | 0.15               | (0.00)    | 0.14                 | (0.13)    | 0.0078  |
| Costs per month, mean (SD)                                             | \$313              | (\$607)   | \$363                | (\$733)   | 0.0087  |
| <b>Total Health Care Utilization and Costs</b>                         |                    |           |                      |           |         |
| Had $\geq 1$ medical visit/encounter (N, %) <sup>a</sup>               | 1,797              | 100.00%   | 5,584                | 100.00%   | ---     |
| Number of total encounters per month, mean (SD)                        | 14.69              | (14.00)   | 16.97                | (13.72)   | <.0001  |
| Costs per month, mean (SD)                                             | \$2,959            | (\$4,962) | \$3,544              | (\$5,811) | 0.0001  |

314 NOTE: SD = standard deviation.

315 <sup>a</sup>Estimated over all available follow-up.

316 <sup>b</sup>Among hospitalized patients.

317

318

319 The multivariate Poisson regression model showed that receiving an STR was associated  
 320 with a significantly lower hospitalization rate than receiving the 2+PPD regimen (IRR = 0.8457;  
 321  $P < 0.001$ ) (Table 5). When the received regimen type was controlled for, we found that patients  
 322 were significantly more likely to be hospitalized if they had the following characteristics: a  
 323 concomitant mental disorder diagnosis (vs. no concomitant mental disorder diagnosis;  
 324 IRR = 1.2917;  $P < 0.001$ ), a concomitant drug or alcohol abuse diagnosis (vs. no concomitant  
 325 drug or alcohol abuse diagnosis; IRR = 2.0357;  $P < 0.001$ ), a CCI score greater than 1 (IRR  
 326 increased with increasing CCI score, from 2.3779 among patients with a CCI between 1 and 2 to  
 327 2.6432 among patients with a CCI greater than 3; all  $P < 0.001$ ), were female (vs. male;  
 328 IRR = 1.1069;  $P = 0.003$ ), or were older than 35 years (vs. younger than 35 years; IRR increased  
 329 with increasing age, up to 54 years, from 1.2482 among patients aged 35-44 years to 1.555  
 330 among patients aged 45-54 years; both  $P < 0.1$ ). Additionally, the likelihood of a hospitalization  
 331 increased slightly with each additional day of follow-up (IRR = 1.0013;  $P < 0.0001$ ). Finally,  
 332 being treatment naïve prior to index was predictive of an approximately 13% higher  
 333 hospitalization rate as compared with being treatment experienced (IRR = 1.1270;  $P = 0.0033$ ).

334

335 **Table 5. Predictors of hospitalization, using multivariate Poisson regression, and**  
 336 **controlling for treatment cohort.**

| Specification: Adherence Covariate Excluded | Poisson Count Model |                      |         |
|---------------------------------------------|---------------------|----------------------|---------|
|                                             | Parameter Estimate  | Incidence Rate Ratio | P-Value |
| Received a STR (vs. 2+PPD regimen)          | -0.1654             | 0.8475               | 0.0001  |
| Female (vs. male)                           | 0.1003              | 1.1069               | 0.003   |
| Age (vs. less than 35)                      |                     |                      |         |
| 35 to 44 years                              | 0.1016              | 1.2482               | 0.0669  |

| Specification: Adherence Covariate Excluded                                         | Poisson Count Model |                      |         |
|-------------------------------------------------------------------------------------|---------------------|----------------------|---------|
|                                                                                     | Parameter Estimate  | Incidence Rate Ratio | P-Value |
| 45 to 54 years                                                                      | 0.2217              | 1.5550               | <.0001  |
| 55+ years                                                                           | 0.4415              | 1.1056               | <.0001  |
| Charlson comorbidity index score (vs. Charlson comorbidity index score less than 1) |                     |                      |         |
| Between 1 and 2                                                                     | 0.8662              | 2.3779               | <.0001  |
| Greater than 2                                                                      | 0.972               | 2.6432               | <.0001  |
| Treatment naïve (vs. treatment experienced)                                         | 0.1196              | 1.1270               | 0.0033  |
| Had a mental disorder diagnosis (vs. no mental disorder diagnosis)                  | 0.256               | 1.2917               | <.0001  |
| Had a drug or alcohol abuse diagnosis (vs. no drug or alcohol abuse diagnosis)      | 0.7109              | 2.0357               | <.0001  |
| Length of follow-up (in days)                                                       | 0.0013              | 1.0013               | <.0001  |

NOTE. 2+PPD = two or more pills per day; STR = once-daily single-tablet regimen.

From the Poisson regression analysis described above, we found the adjusted rate of hospitalization to be significantly lower for patients receiving an STR than for patients receiving 2+PPD (i.e., 39.5 hospitalizations per 100 patient-years for patients receiving STR vs. 51.2 hospitalizations per 100 patient-years for those receiving 2+PPD) (Figure 2). These adjusted hospitalization rates translated to a 23% lower risk of hospitalization among patients receiving an STR, compared with patients receiving 2+PPD. As shown in Figure 3, adherence status seems to be a key mechanism mediating hospitalization risk as patients with at least 95% adherence (regardless of regimen type) had a statistically significant lower hospitalization rate compared to patients with less than 95% adherence. Improved adherence among patients treated with STR therefore appears to confer a lower risk of hospitalization and associated costs.

Examining other types of health care utilization, the percentage of patients with at least one home health visit was significantly lower among patients receiving STR than for patients receiving 2+PPD (Table 4). Between the two cohorts, no differences were observed in the percentage of patients with at least one emergency room, office visit, or laboratory claim.

1  
2  
3 353 Similarly, no significant differences were found in the number of emergency room, office visits,  
4  
5 354 home health visits, or laboratory claims per month. However, patients who received an STR had  
6  
7  
8 355 significantly lower costs per month associated with inpatient, home health, laboratory, pharmacy,  
9  
10 356 other, and total health care than patients receiving 2+PPD. Mean (SD) total health care costs per  
11  
12 357 month were \$2,959 (\$4,962) among patients receiving an STR and \$3,544 (\$5,811) among  
13  
14 358 patients receiving 2+PPD; thus, patients receiving an STR accrued, on average per month, \$585  
15  
16 359 less than patients receiving 2+PPD ( $P < 0.001$ ). The largest difference in costs between the two  
17  
18 360 cohorts was observed for inpatient admissions (\$317 more for patients receiving 2+PPD),  
19  
20 361 followed by pharmacy costs (\$187 more for patients receiving 2+PPD).

21  
22 362 When monthly health care costs were adjusted for demographic, clinical, and treatment  
23  
24 363 characteristics, patients receiving an STR had monthly total costs averaging \$2,947; patients  
25  
26 364 receiving 2+PPD had monthly total costs averaging \$3,549 (Figure 4). Thus, patients receiving  
27  
28 365 2+PPD had \$602 more in monthly health care costs, which corresponded to a 17% reduction in  
29  
30 366 costs associated with STR. Additionally, when monthly health care costs, excluding pharmacy  
31  
32 367 costs, were adjusted for demographic, clinical, and treatment characteristics, patients receiving  
33  
34 368 an STR had monthly total costs averaging \$1,370; patients receiving 2+PPD had monthly total  
35  
36 369 costs averaging \$1,797. Thus, patients receiving 2+PPD had \$427 more in adjusted monthly  
37  
38 370 health care costs, which corresponded to a 23.8% reduction in costs associated with STR.  
39  
40  
41  
42  
43  
44  
45  
46  
47  
48  
49  
50  
51  
52  
53  
54  
55  
56  
57  
58  
59  
60

1  
2  
3 371 **DISCUSSION**  
4  
5

6 372 This retrospective database analysis examined adherence to ART regimens among patients  
7  
8 373 with HIV infection, using pharmacy refill dates as the best available proxy for pill-taking  
9  
10 374 behavior. One advantage to this method is that we can identify those patients who may not have  
11  
12 375 had all or some of their medications available on any given date based on an analysis of the  
13  
14 376 timing in between refills, which also notes the amount of medication dispensed each time. The  
15  
16 377 rate of hospitalization and correlates of hospitalization also were assessed from these claims data  
17  
18  
19  
20 378 and should be highly accurate, as should the overall monthly health care utilization and costs.  
21

22  
23 379 This analysis largely confirms the previous report from Sax et al.[16]: we found that patients  
24  
25 380 receiving an STR had significantly better adherence rates than patients receiving multiple pills  
26  
27 381 per day. Our other finding was that higher rates of adherence were associated with similar or  
28  
29 382 lower rates of hospitalization, regardless of the regimen; less-than-complete adherence was  
30  
31 383 associated with higher rates of hospitalization and overall costs. Thus, multiple-pill regimens  
32  
33 384 were associated both with lower rates of complete adherence and correspondingly higher overall  
34  
35 385 health care costs. We observed a significantly higher rate of hospitalizations occurring in patients  
36  
37 386 receiving multiple-pill regimens ( $P < 0.001$ ) than in patients receiving an STR. The greater total  
38  
39 387 health care costs were due to differences in both the pharmacy costs of the regimen components  
40  
41 388 as well as the costs of hospitalizations and associated care. Therefore, one implication of our  
42  
43 389 findings is that choosing a multiple-pill regimen for its cost alone might inadvertently result in  
44  
45 390 little to no total health care cost-savings for a payer, given the potential risk of more frequent  
46  
47 391 hospitalizations in patients receiving multiple-pill regimens.  
48  
49  
50

51  
52 392 Similar to previous studies [20,21], we found that patients who were adherent to therapy  
53  
54 393 were less likely to be hospitalized. Our data demonstrated similar rates of hospitalizations among  
55  
56 394 patients with the highest levels of complete adherence—at least 95%. This was consistent across  
57  
58  
59  
60

1  
2  
3 395 both treatment cohorts. This finding suggests that the differences observed in the rates of  
4  
5 396 hospitalizations across regimens are primarily due to differences in adherence rates between the  
6  
7  
8 397 STR and 2+PPD regimens rather than any concerns for toxicities. This finding also may partially  
9  
10 398 address the potential contribution of channeling bias, a concern with any observational data set.  
11  
12 399 We found that adherent patients on any regimen have similar rates of hospitalization, which  
13  
14 400 suggests that there may not have been a consistent bias to prescribe to more clinically  
15  
16 401 immunosuppressed patients or to patients who were at greater risk for hospitalization due to  
17  
18 402 other factors than a multiple-pill regimen. Furthermore, we found that the outcome of fewer  
19  
20 403 hospitalizations for patients receiving an STR was consistent when we compared hospitalization  
21  
22 404 risks for treatment-naïve patients with hospitalization risks for treatment-experienced patients. In  
23  
24 405 the latter group, the impact of stage of illness prior to treatment would be lessened, given the  
25  
26 406 impact of prior treatment on improving pretreatment immunosuppression, with an STR regimen.  
27  
28 407 Of final note regarding channeling bias, previous analyses of Medicaid beneficiaries with HIV  
29  
30 408 have shown that patients receiving ART are completely non-adherent (i.e., days with no ART  
31  
32 409 supply/coverage on hand) for approximately 14% of their regimen duration regardless of the  
33  
34 410 number of pills in the regimen [22]. This finding suggests that clinicians are not channeling more  
35  
36 411 adherent patients to STRs. Together, these data support the observation that facilitating greater  
37  
38 412 adherence to ART at any stage of illness may result in reducing hospitalization risk.  
39  
40  
41  
42  
43  
44  
45

46 413 One follow-up question our study findings raises is whether the observed reduction in  
47  
48 414 hospitalization risk and costs with STR was also due to less prevalent chronic comorbidities in  
49  
50 415 patients prescribed STR. To assess this possibility, we replicated key descriptive analyses on  
51  
52 416 hospitalization rates for patients with no baseline comorbidities as reported by the CCI. We  
53  
54 417 found that the majority (~70%) of both STR and 2+PPD patients had no other CCI  
55  
56 418 comorbidities. Among STR patients with no other comorbidities from the CCI, 13.9% had a  
57  
58  
59  
60

1  
2  
3 419 hospitalization compared with 18.3% of 2+PPD patients with no other comorbidities. Further,  
4  
5 420 among STR patients with no comorbidities, 11.4% of adherent patients had a hospitalization  
6  
7 421 compared with 14.7% of non-adherent patients. Similarly, among 2+PPD patients with no  
8  
9 422 comorbidities, 12.4% of adherent patients had a hospitalization compared with 19.7% of non-  
10  
11 423 adherent patients. Results of this sensitivity analysis, combined with the observation that the vast  
12  
13 424 majority of patients in our study had no major comorbidities (from the CCI) requiring other  
14  
15 425 chronic treatment, suggest that the observed association between poorer adherence and higher  
16  
17 426 hospitalization was likely due to reduced ART adherence and not due to reduced adherence with  
18  
19 427 other medications patients were taking.  
20  
21  
22  
23

24 428 There were several measurable differences present in the study population at baseline. Our  
25  
26 429 study attempted to control for effects these differences may have had on rates of hospitalization  
27  
28 430 between STR and 2+PPD patients. We used multivariate regressions to control for patient  
29  
30 431 demographics, treatment characteristics (i.e., treatment naïve vs. experienced, type of ART  
31  
32 432 received), and clinical characteristics (i.e., CCI score, concomitant mental disorder, drug and  
33  
34 433 alcohol abuse diagnoses). We found that a number of factors were associated with an increased  
35  
36 434 risk of hospitalization independent of treatment regimen, including having a CCI score greater  
37  
38 435 than 1; having a concomitant drug or alcohol abuse diagnosis; having a concomitant mental  
39  
40 436 health disorder; being female and of older age; and being treatment naïve.  
41  
42  
43  
44

45 437 Even after controlling for the factors noted above, we still detected an independent  
46  
47 438 association of regimen type with hospitalization rates and, in fact, observed an increase in the  
48  
49 439 apparent protective effect of STR based on the predicted, adjusted hospitalization rate derived  
50  
51 440 from the Poisson model (39.5 per 100 patients in the STR group vs. 51.2 per 100 patients in the  
52  
53 441 2+PPD group; see Figure 2). One possible explanation for this difference is that the Poisson  
54  
55 442 model corrected a substantial imbalance in the proportion of patients who were treatment naïve  
56  
57  
58  
59  
60



1  
2  
3 443 at index (47.5% of STR patients vs. 24.5% of 2+PPD patients). Lack of or naivety to ART  
4  
5 444 exposure has been shown in some studies to be a positive predictor of hospitalization in HIV  
6  
7 445 patients [23], perhaps because approximately one-third of HIV patients wait to seek care until  
8  
9 446 their disease has progressed to the point that they need acute treatment. [24, 25] As noted in a  
10  
11 447 recent study by Metsch et al. [26], these patients often obtain initial care in emergency  
12  
13 448 departments and hospital inpatient wards, and they tend not to be persistent with follow-up  
14  
15 449 outpatient care. This pattern of treatment induction may further increase their risk of infection  
16  
17 450 and re-hospitalization in the short-term. Because being treatment naïve was shown in our data to  
18  
19 451 be predictive of hospitalization, the Poisson model's adjustment for the overrepresentation of  
20  
21 452 treatment naivety in the STR group may therefore have resulted in the larger difference between  
22  
23 453 STR and 2+PPD in hospitalizations than observed in the crude, unadjusted comparison.  
24  
25  
26  
27  
28

29 454 One hypothesis for a plausible mechanism by which the outcomes observed in our study  
30  
31 455 could occur stems from observations in the SMART study.[27] That study, comparing  
32  
33 456 continuous antiviral treatment versus periodic treatment interruptions, demonstrated that HIV  
34  
35 457 treatment interruptions that were of sufficient length of time to lead to recurrent HIV viremia  
36  
37 458 were associated with a significantly higher risk of all-cause morbidity and mortality. Our  
38  
39 459 analysis was consistent with those findings: the mean maximum duration of nonadherence was  
40  
41 460 about 3 weeks, which is a sufficient length of time to expect a return of HIV viremia. The  
42  
43 461 SMART study noted that the higher risk of illness was not necessarily proximal to the time of the  
44  
45 462 interruption but was observed for months afterwards. While there are differences between the  
46  
47 463 SMART study design and population and our study population, our findings are consistent with  
48  
49 464 SMART and with what might be expected in a population who periodically are without antivirals  
50  
51 465 for an average time of more than 3 weeks. Of note, short cycle interruptions of 2 days were not  
52  
53 466 associated with virologic rebound in patients receiving the STR that was used in the SMART  
54  
55  
56  
57  
58  
59  
60



1  
2  
3 467 study [28]. Therefore, our finding that the typical interruptions were much longer than this is  
4  
5  
6 468 supportive of a mechanism that could have resulted in increased patient morbidity.

7  
8 469 It is also important to note that patients in this study generally were reasonably adherent to  
9  
10 470 ART, with a mean adherence of just over 80% regardless of the number of pills received per day.  
11  
12 471 This rate of adherence is consistent with other published reports of adherence, although other  
13  
14 472 reports found even higher adherence rates to an STR.[13,14] Furthermore, the difference  
15  
16 473 observed in our study between the STR and 2+PPD regimens (approximately 4%) is consistent  
17  
18 474 with what was observed by Sax et al. of 2.2%.[16] This difference is also consistent with the  
19  
20 475 differences in adherence rates reported when comparing average improvement between once-  
21  
22 476 daily and twice-daily regimens (2.9%).[29] It is important to note that there also were highly  
23  
24 477 nonadherent patients to both the STR and the 2+PPD regimes in this study population,  
25  
26 478 supporting the generalizability of this population.

27  
28  
29 479 Of further note, the differences observed in our study were associated with factors that  
30  
31 480 typically are not present during randomized clinical trials. Randomized trials typically actively  
32  
33 481 work for patient adherence to study medications and use study coordinators to regularly monitor  
34  
35 482 patients to minimize missed doses. In our observational study, these typical adherence supports  
36  
37 483 are not in place; thus, our data may reflect real-world lapses in patient behavior in refilling  
38  
39 484 prescriptions, including partial regimen refills, which would not be observed in clinical trials.  
40  
41 485 While there are concerns about the interpretation of observational data and the determination of  
42  
43 486 causal relationships, it is not clear if a randomized study comparing an STR with a multiple-pill  
44  
45 487 regimen would be able to detect the observed differences unless there was less patient support  
46  
47 488 than is standard in clinical trials.

48  
49 489 Our data do not suggest that all patients should be on an STR. There are many factors that  
50  
51 490 weigh in the decision of which regimen is best for any given patient, including pre-existing  
52  
53  
54  
55  
56  
57  
58  
59  
60

1  
2  
3 491 virologic resistance and tolerability. In our study, the anticipated adherence benefits observed in  
4  
5 492 association with a lower pill burden is relevant but should not be construed as a suggestion that  
6  
7  
8 493 an STR is the ideal choice for the entire population of patients with HIV. Nevertheless, our data  
9  
10 494 do support the continued development of additional STR options, to broaden the number of  
11  
12 495 patients for whom this is an option and the number of subsequent beneficial outcomes.

14  
15 496 Our study has several limitations common to observational claims database analyses.

16  
17 497 Adherence was calculated by using pharmacy refill dates, and we have no measure of actual  
18  
19 498 patient adherence to the prescriptions they filled. However, this measure has been found to be a  
20  
21 499 useful proxy for actual medication adherence.[30] Because we did not randomize patients to the  
22  
23 500 two different treatment regimens, we cannot exclude unmeasured confounding factors that may  
24  
25 501 have influenced our outcomes. Among the most important of these factors in this study was that  
26  
27 502 multiple trials have shown that medication resistance at the time of virologic failure is  
28  
29 503 significantly less common in boosted PI treatments than on other regimens, including  
30  
31 504 nonnucleoside/nucleotide reverse transcriptase inhibitor-based treatments.[31,32] Clinicians  
32  
33 505 could have chosen to prescribe a boosted-PI-containing regimen (all of which contain three or  
34  
35 506 more pills per day) to their less-adherent patients. It cannot be determined from this data set that  
36  
37 507 these patients would have been more adherent on an STR. Although we attempted to control for  
38  
39 508 some of these variables through the use of multivariable models that included some of these  
40  
41 509 factors (substance abuse and psychiatric diagnoses), residual confounding may remain. In  
42  
43 510 addition, we had no laboratory results from patients and thus cannot confirm the degree of  
44  
45 511 virologic suppression obtained across the regimens. Finally, although our data include  
46  
47 512 information from the Medicaid programs in 11 states, the authors were blinded (as per data  
48  
49 513 privacy rules) as to which specific states are captured. Although the database's documentation  
50  
51  
52  
53  
54  
55  
56  
57  
58  
59  
60

1  
2  
3 514 suggests that the states are geographically dispersed, we cannot assert that our findings would be  
4  
5 515 fully representative of the general Medicaid population in the US.  
6  
7

8 516 In our study, a large proportion of HIV-treated individuals (15% of the total HIV-treated  
9  
10 517 population) were excluded from the analysis due to their having received incomplete ART  
11  
12 518 regimens. We did not have sufficient data on these patients to explain why their regimens were  
13  
14 519 incomplete. However, a previous study found that physician medication errors were somewhat  
15  
16 520 common in individuals with HIV, with the most common error occurring with boosted PIs  
17  
18 521 (estimated at 5.3% of patients); such errors may explain some of the incomplete regimens  
19  
20 522 observed in our analysis.[33] Increased adoption of fixed-dose combinations as part of HIV  
21  
22 523 treatment may help to alleviate the issue of incomplete regimens.  
23  
24  
25  
26

27 524 During our study period, the only available single-pill ART regimen was coformulated  
28  
29 525 efavirenz/emtricitabine/tenofovir disoproxil fumarate. It is possible that these results would not  
30  
31 526 be generalizable to other one- and multi-pill regimens if other treatments have different efficacy  
32  
33 527 and toxicity profiles. With the recent approval by the Food and Drug Administration of two other  
34  
35 528 STRs (i.e., tenofovir, emtricitabine, and rilpivirine and tenofovir, emtricitabine, elvitegravir and  
36  
37 529 cobicistat), it may eventually be possible to explore the applicability of our observations to other  
38  
39 530 STRs.  
40  
41  
42

43 531 In summary, this study supported the results as reported by Sax et al.[16] We found that  
44  
45 532 patients who received ART as a single pill per day were significantly more likely to be highly  
46  
47 533 adherent to therapy than patients who received multiple-pill regimens. This difference in  
48  
49 534 adherence was associated with a lower risk of hospitalizations: patients with less-than-complete  
50  
51 535 adherence were more likely to be hospitalized. While we acknowledge the limitations associated  
52  
53  
54 536 with any observational study, our data support our finding that the use of an STR may reduce  
55  
56  
57  
58  
59  
60

1  
2  
3  
4  
5  
6  
7  
8  
9  
10  
11  
12  
13  
14  
15  
16  
17  
18  
19  
20  
21  
22  
23  
24  
25  
26  
27  
28  
29  
30  
31  
32  
33  
34  
35  
36  
37  
38  
39  
40  
41  
42  
43  
44  
45  
46  
47  
48  
49  
50  
51  
52  
53  
54  
55  
56  
57  
58  
59  
60

537 health care costs as well as patient morbidity by decreasing hospitalization rates, which are  
538 higher in patients with less-than-complete medication adherence.

For peer review only

539 **REFERENCES**

- 540 1. Thompson MA, Aberg JA, Cahn P, Montaner JSG, Rizzardini G, et al. (2010)  
541 Recommendations of the IAS-USA Panel. *JAMA* 304: 321-333.
- 542 2. Henry K (2010) Report from the 17th Conference on Retroviruses and Opportunistic  
543 Infections. More data and answers from ACTG 5202. *J Watch AIDS Clin Care* 22 (4):  
544 30.
- 545 3. Rockstroh JK, Lennox JL, Dejesus E, Saag MS, Lazzarin A, et al; STARTMRK  
546 Investigators (2011) Long-term treatment with raltegravir or efavirenz combined with  
547 tenofovir/emtricitabine for treatment-naïve human immunodeficiency virus-1-infected  
548 patients: 156-week results from STARTMRK. *Clin Infect Dis* 53 (8): 807-816.
- 549 4. Fielden SJ, Rusch ML, Yip B, Wood E, Shannon K, et al. (2008) Nonadherence increases  
550 the risk of hospitalization among HIV-infected antiretroviral naïve patients started on  
551 HAART. *J Int Assoc Physicians AIDS Care* 7: 238-244.
- 552 5. Kitahata MM, Reed SD, Dillingham PW, Van Rompaey SE, Young AA, et al. (2004)  
553 Pharmacy-based assessment of adherence to HAART predicts virological and  
554 immunologic treatment response and clinical progression to AIDS and death. *Int J STD*  
555 *AIDS* 15: 803-810.
- 556 6. Wood E, Hogg RS, Yip B, Harrigan PR, O'Shaughnessy MV, et al. (2003) Effect of  
557 medication adherence on survival of HIV-infected adults who start highly active  
558 antiretroviral therapy when the CD4+ cell count is 0.200 to 0.350 × 10<sup>9</sup> cells/L. *Ann*  
559 *Intern Med* 139: 810-816.
- 560 7. Bangsberg DR, Perry S, Charlebois ED, Clark RA, Roberston M, et al. (2001)  
561 Nonadherence to highly active antiretroviral therapy predicts progression to AIDS. *AIDS*  
562 15: 1181-1183.

- 1  
2  
3 563 8. Paterson DL, Swindells S, Mohr J, Brester M, Vergis EN, et al. (2000) Adherence to  
4  
5 564 protease inhibitor therapy and outcomes in patients with HIV infection. *Ann Intern Med*  
6  
7 565 133: 21-30.  
8  
9  
10 566 9. Arnsten J, Demas P, Farzadegan H, [Grant RW](#), [Gourevitch MN](#), et al. (2001)  
11  
12 567 Antiretroviral therapy adherence and viral suppression in HIV-infected drug users:  
13  
14 568 comparison of self-report and electronic monitoring. *Clin Infect Dis* 33: 1417-1423.  
15  
16  
17 569 10. Bangsberg DR. (2006) Less than 95% adherence to nonnucleoside reverse-transcriptase  
18  
19 570 inhibitor therapy can lead to viral suppression. *Clin Infect Dis* 43(7): 939-941.  
20  
21  
22 571 11. Panel on Antiretroviral Guidelines for Adults and Adolescents, Department of Health and  
23  
24 572 Human Services (2009) Guidelines for the Use of Antiretroviral Agents in HIV-1-  
25  
26 573 Infected Adults and Adolescents. Available:  
27  
28 574 <http://www.aidsinfo.nih.gov/contentfiles/AdultandAdolescentGL001419.pdf>. Accessed  
29  
30 575 2012 Aug 25.  
31  
32  
33 576 12. DeJesus E, Young B, Morales-Ramirez JO, Sloan L, Ward DJ, et al. (2009)  
34  
35 577 Simplification of antiretroviral therapy to a single tablet regimen consisting of efavirenz,  
36  
37 578 emtricitabine and tenofovir disoproxil fumarate versus unmodified antiretroviral therapy  
38  
39 579 in virologically suppressed HIV-1-infected patients. *J Acquir Immune Defic Syndr*  
40  
41 580 51: 163-174.  
42  
43  
44 581 13. Hodder SL, Mounzer K, DeJesus E, Ebrahimi R, Grimm K, et al. (2010) Patient-reported  
45  
46 582 outcomes in virologically suppressed, HIV-1-infected subjects after switching to a  
47  
48 583 simplified, single tablet regimen of efavirenz, emtricitabine and tenofovir DF. *AIDS*  
49  
50 584 Patient Care STDs 24: 115-125.  
51  
52  
53  
54  
55  
56  
57  
58  
59  
60

- 1  
2  
3 585 14. Airoidi M, Zaccarelli M, Bisi L, Bini T, Antinori A, et al. (2010) One-pill once-a-day  
4  
5 586 HAART: a simplification strategy that improves adherence and quality of life of HIV-  
6  
7 587 infected subjects. *Patient Prefer Adherence* 4: 115-125.  
8  
9  
10 588 15. Bangsberg DR, Ragland K, Monk A, Deeks SG (2010) A single tablet regimen is  
11  
12 589 associated with higher adherence and viral suppression than multiple tablet regimens in  
13  
14 590 HIV+ homeless and marginally housed people. *AIDS* 24: 2835-2840.  
15  
16  
17 591 16. Sax PE, Meyers JL, Mugavero M, Davis KL (2012) Adherence to antiretroviral treatment  
18  
19 592 and correlation with risk of hospitalization among commercially insured HIV patients in  
20  
21 593 the United States. *PLoS One* 7 (2): e31591.  
22  
23  
24 594 17. Charlson ME, Pompei P, Ales KL, McKenzie CR (1987) A new method of classifying  
25  
26 595 prognostic comorbidity in longitudinal studies: development and validation. *J Chron Dis*  
27  
28 596 40: 373-383.  
29  
30  
31 597 18. Andrade SE, Kristijan KH, Frech F, Chan K (2006) Methods for evaluation of medication  
32  
33 598 adherence and persistence using automated databases. *Pharmacoepidemiol Drug Saf*  
34  
35 599 15: 565-574.  
36  
37  
38 600 19. Legorreta A, Yu A, Chernicoff H, Gilmore A, Jordan J, et al. (2005) Adherence to  
39  
40 601 combined lamivudine + zidovudine versus individual components: a community-based  
41  
42 602 retrospective Medicaid claims analysis. *AIDS Care* 17: 938-948.  
43  
44  
45 603 20. Fielden SJ, Rusch ML, Yip B, Wood E, Shannon K, et al. (2008) Nonadherence increases  
46  
47 604 the risk of hospitalization among HIV-infected antiretroviral naïve patients started on  
48  
49 605 HAART. *J Int Assoc Physicians AIDS Care* 7: 238-244.  
50  
51  
52 606 21. Juday T, Gupta S, Grimm K, Wagner S, Kim E (2011) Factors associated with complete  
53  
54 607 adherence to HIV combination antiretroviral therapy. *HIV Clin Trials* 12: 71-78.  
55  
56  
57  
58  
59  
60

- 1  
2  
3 608 22. Cohen CJ, Davis KL, Meyers J. Association of partial adherence to antiretroviral therapy  
4  
5 609 with hospitalizations and healthcare costs in an HIV population. Poster presented at the  
6  
7 610 11th International Congress on Drug Therapy in HIV Infection; November 2012.  
8  
9 611 Glasgow, United Kingdom.
- 12 612 23. [Gebo KA](#), [Diener-West M](#), [Moore RD](#). (2006) Hospitalization rates in an urban cohort  
13  
14 613 after the introduction of highly active antiretroviral therapy. *J Acquir Immune Defic*  
15  
16 614 *Syndr* 27 (2):143-52.
- 19 615 24. Fleming PL, Byers RH, Sweeney PA, Daniels D, Karon JM, Janssen RS. HIV prevalence  
20  
21 616 in the United States, 2000. Abstract presented at: 9th Conference on Retroviruses and  
22  
23 617 Opportunistic Infections; February 24–28, 2002; Seattle, WA.
- 26 618 25. Samet JH, Freedberg KA, Savetsky JB, Sullivan LM, Stein MD. Understanding delay to  
27  
28 619 medical care for HIV infection: the long-term non-presenter. *AIDS* 2001;15(1):77–85.
- 31 620 26. [Metsch LR](#), [Bell C](#), [Pereyra M](#), [Cardenas G](#), [Sullivan T](#), et al. Hospitalized HIV-infected  
32  
33 621 patients in the era of highly active antiretroviral therapy. *Am J Public Health*.  
34  
35 622 2009;99(6):1045-9.
- 38 623 27. Burman W, Clumeck N, Cohen CJ, Cohn D, Cooper D, et al. (2006) CD4+ count-guided  
39  
40 624 interruption of antiretroviral treatment. *N Eng J Med* 355 (22): 2283-2296.
- 43 625 28. Cohen CJ, Colson AE, Pierone G, DeJesus E, Kinder F, Elion R, Skiest D, Habel A,  
44  
45 626 Jensen J, J Garb, Schragr HS. The FOTO study: 24-week results support the safety of a  
46  
47 627 2-day break on efavirenz-based antiretroviral therapy. *Journal of the International AIDS*  
48  
49 628 *Society* 2008;11 (Suppl. 1):019.
- 52 629 29. Parienti J-J, Bangsberg DR, Verdon R, Gardner EM (2009) Better adherence with once-  
53  
54 630 daily antiretroviral regimens: a meta-analysis. *Clin Infect Dis* 48: 484-488.
- 55  
56  
57  
58  
59  
60



- 1  
2  
3 631 30. McMahon JH, Jordan MR, Kelley K, Bertagnolio S, Hong SY, et al. (2011) Pharmacy  
4  
5 632 adherence measures to assess adherence to antiretroviral therapy: review of the literature  
6  
7  
8 633 and implications for treatment monitoring. *Clin Infect Dis* 52: 493-506.  
9  
10 634 31. Daar ES, Tierney C, Fischl MA, Sax PE, Mollan K, et al. (2011) Atazanavir plus  
11  
12 635 ritonavir or efavirenz as part of a 3-drug regimen for initial treatment of HIV-1. *Ann*  
13  
14 636 *Intern Med* 154: 445-456.  
15  
16  
17 637 32. Riddler SA, Haubrich R, DiRienzo AG, Peeples L, Powderly WG, et al. (2008) Class-  
18  
19 638 sparing regimens for initial treatment of HIV-1 infection. *N Engl J Med* 358: 2095-2106.  
20  
21  
22 639 33. Hellinger FJ, Encinosa WE (2010) The cost and incidence of prescribing errors among  
23  
24 640 privately insured HIV patients. *Pharmacoeconomics* 28: 23-34.  
25  
26  
27  
28  
29  
30  
31  
32  
33  
34  
35  
36  
37  
38  
39  
40  
41  
42  
43  
44  
45  
46  
47  
48  
49  
50  
51  
52  
53  
54  
55  
56  
57  
58  
59  
60

1  
2  
3  
4  
5  
6  
7  
8  
9  
10  
11  
12  
13  
14  
15  
16  
17  
18  
19  
20  
21  
22  
23  
24  
25  
26  
27  
28  
29  
30  
31  
32  
33  
34  
35  
36  
37  
38  
39  
40  
41  
42  
43  
44  
45  
46  
47  
48  
49  
50  
51  
52  
53  
54  
55  
56  
57  
58  
59  
60

641 **FIGURE LEGENDS**

642 **Figure 1. Sample Selection Flow Chart**

643 **Figure 2. Adjusted Rate of Hospitalizations per 100 Patient-years, by Cohort**

644 **Figure 3. Hospitalizations per 100 Patient-Years, by Cohort and Adherence**

645 **Figure 4. Adjusted Monthly Health Care Costs, by Cohort**

For peer review only

1  
2  
3  
4  
5  
6  
7  
8  
9  
10  
11  
12  
13  
14  
15  
16  
17  
18  
19  
20  
21  
22  
23  
24  
25  
26  
27  
28  
29  
30  
31  
32  
33  
34  
35  
36  
37  
38  
39  
40  
41  
42  
43  
44  
45  
46  
47  
48  
49  
50  
51  
52  
53  
54  
55  
56  
57  
58  
59  
60

For peer review only

1  
2  
3  
4  
5  
6  
7  
8  
9  
10 1 Association between Daily Antiretroviral Pill Burden Effects on and  
11 2 Medication Treatment Adherence, Hospitalization Risk, and Other  
12  
13  
14 3 **Health Care Utilization and Costs in a United States Medicaid**  
15  
16 4 **Population with HIV**  
17  
18  
19

20 6 **Short Title:** Antiretroviral Pill Burden in Medicaid Patients  
21  
22 7

23  
24 8 **Authors and Affiliations:** Calvin Cohen,<sup>1</sup> Juliana L. Meyers,<sup>2</sup> Keith L. Davis<sup>2</sup>  
25

26 9 <sup>1</sup> CRI New England, Harvard Medical School, Boston, MA, USA  
27

28 10 <sup>2</sup> RTI Health Solutions, Research Triangle Park, NC, USA  
29  
30 11

31  
32 12 **Key Words:** HIV, Medicaid, Adherence, Hospitalization, Health Care Utilization  
33  
34 13

35 14 **Word Count:** 5,453  
36  
37 15  
38

39 16 **Corresponding Author**

40  
41 17 Keith L. Davis, MA  
42

43 18 RTI Health Solutions  
44

45 19 200 Park Offices Drive  
46

47 20 Research Triangle Park, NC 27709 USA  
48

49 21 Telephone: 1.919.541.1273  
50

51 22 Fax: +1.919.541.7222  
52

53 23 E-mail: kldavis@rti.org  
54  
55  
56  
57  
58  
59  
60

24 **ABSTRACT**

25 **Objectives:** Lower pill burden leads to improved ~~adherence to~~ antiretroviral therapy (ART)  
 26 ~~adherence~~ among human immunodeficiency virus (HIV) patients. Simpler dosing regimens have  
 27 not been widely explored in real-world populations. We retrospectively assessed ~~ART~~  
 28 ~~adherence, all-cause hospitalization risk and costs, and other~~ health care utilization and costs in  
 29 Medicaid enrollees with HIV treated with ART as a once-daily single-tablet regimen (STR) or  
 30 two or more pills per day (2+PPD).

31 **Design:** Patients with an HIV diagnosis from 2005-2009 receiving complete ART (i.e., 2  
 32 nucleoside/nucleotide reverse transcriptase inhibitors plus a third agent) for  $\geq 60$  days ~~or more~~ as  
 33 STR or 2+PPD were selected and followed until the first of (1) discontinuation of the complete  
 34 ART, (2) loss of ~~continuous~~ enrollment, or (3) end of ~~the~~ database. Adherence was measured  
 35 using the medication possession ratio. Monthly ~~all-cause health care~~ utilization and costs were  
 36 observed from regimen initiation until ~~discontinuation follow-up end, and reported overall and by~~  
 37 ~~care setting (inpatient, emergency department, office, pharmacy, other). To assess predictors of~~  
 38 ~~hospitalization, Poisson models, counting the number of hospitalizations and covariates for~~  
 39 ~~demographics, comorbidities, and ART naïve status, were estimated.~~

40 **Results:** Of the 7,381 patients who met inclusion criteria, 1,797 were treated with STR and  
 41 5,584 with 2+PPD. STR patients were significantly more likely to reach ~~a~~ 95% adherence  
 42 ~~threshold~~ and had fewer hospitalizations than 2+PPD patients (both:  $P < 0.01$ ). STR patients had  
 43 mean (SD) total monthly costs of \$2,959 (\$4,962); 2+PPD patients had \$3,544 (\$5,811)  
 44 ( $P < 0.001$ ). Hospital costs accounted for 53.8% and pharmacy costs accounted for 32.5% of this  
 45 difference. Multivariate analyses found that STR ~~treatment~~ led to a 23% reduction in  
 46 hospitalizations and a 17% reduction in ~~overall~~ health care costs. ~~ART adherence appears to be a~~

**Comment [k1]:** Text eliminated to stay within 300 word limit of abstract after requested changes/additions by reviewer. Other minor edits made throughout abstract to comply with word count.

1  
2  
3  
4  
5  
6  
7  
8  
9 47 | key mechanism mediating hospitalization risk, as patients with  $\geq 95\%$  adherence (regardless of  
10  
11 48 | regimen type) had a lower hospitalization rate compared with  $< 95\%$  adherence.

12  
13 49 |     **Conclusions:** While it was expected that STR patients would have lower pharmacy costs, we  
14  
15 50 | also found that STR patients had fewer hospitalizations and lower hospital costs than 2+PPD  
16  
17 51 | patients, resulting in significantly lower total health care costs for STR patients.  
18  
19  
20  
21  
22  
23  
24  
25  
26  
27  
28  
29  
30  
31  
32  
33  
34  
35  
36  
37  
38  
39  
40  
41  
42  
43  
44  
45  
46  
47  
48  
49  
50  
51  
52  
53  
54  
55  
56  
57  
58  
59  
60

1  
2  
3  
4  
5  
6  
7  
8  
9 52 **ARTICLE SUMMARY**

10  
11 53 **Article Focus**

- 12  
13 54 |     ▪ To assess the effect of association between a single-tablet-per-day ART regimen (STR) ~~on~~  
14 55 and treatment adherence ~~and~~, all-cause hospitalization risk, and other all-cause health  
15 56 care utilization and costs in a large population of Medicaid enrollees in the United States  
16  
17 57 who received treatment for HIV infection

18  
19  
20 58 **Key Messages**

- 21  
22 59 |     ▪ Patients who received ART as a single pill per day were significantly more likely to be  
23 60 highly adherent (≥ 95%) to therapy than patients who received multiple-pill regimens.  
24  
25 61 |     ▪ Improved adherence among patients treated with STR conferred a lower risk of  
26 62 hospitalization.  
27  
28 63 |     ▪ The use of an STR may reduce health care costs as well as patient morbidity by  
29 64 decreasing hospitalization rates, which were higher in patients with less-than-complete  
30 65 medication adherence.

31  
32 66 **Strengths and Limitations of This Study**

- 33  
34  
35  
36 67 |     ▪ This retrospective analysis used pharmacy refill dates as the best available proxy for pill-  
37 68 taking behavior; one advantage to this method is that we can identify those patients who  
38 69 may not have had all or some of their medications available on any given date based on  
39 70 an analysis the timing in between refills, which also notes the amount of medication  
40 71 dispensed each time.  
41  
42 72 |     ▪ Rates of hospitalization and correlates of hospitalization also were assessed from these  
43 73 claims data and should be highly accurate, as should measures of overall monthly health  
44 74 care utilization and costs.

- 1  
2  
3  
4  
5  
6  
7  
8  
9 75     ▪ While our prescription claims-based measure of adherence has been found to be a valid  
10 76         proxy for actual medication-taking behavior, we had no measure of actual patient  
11 77         adherence (i.e., daily ingestion/consumption) to the prescriptions they filled.  
12  
13  
14 78     ▪ Because we did not randomize patients to the two different treatment regimens, we  
15 79         cannot exclude unmeasured confounding factors that may have influenced our outcomes;  
16 80         although we attempted to control for some of these variables through the use of  
17 81         multivariable models that included some of these factors (substance abuse and psychiatric  
18 82         diagnoses), residual confounding may remain.  
19  
20  
21  
22  
23  
24 83     ▪ We had no laboratory results from patients and thus cannot confirm the degree of  
25 84         virologic suppression obtained across the regimens.  
26  
27  
28  
29  
30  
31  
32  
33  
34  
35  
36  
37  
38  
39  
40  
41  
42  
43  
44  
45  
46  
47  
48  
49  
50  
51  
52  
53  
54  
55  
56  
57  
58  
59  
60



1  
2  
3  
4  
5  
6  
7  
8  
9 85 **ADMINISTRATIVE STATEMENTS**

10  
11 86 **Protection of Human Subjects**

12  
13 87 The research organization that conducted this study, RTI Health Solutions, a business unit of  
14  
15 88 RTI International (RTI), holds a Federal-Wide Assurance (FWA #3331 effective until June 17,  
16  
17 89 2014) from the Department of Health and Human Services (DHHS) Office for Human Research  
18  
19 90 Protections (OHRP) that allows us to review and approve human subjects protocols through our  
20  
21 91 Institutional Review Board (IRB) committees. Since pre-existing, retrospective, de-identified  
22  
23 92 patient data were analyzed for this study, which involved no patient contact or medical  
24  
25 93 interventions and therefore no patient consent forms, the RTI IRB committee approved this study  
26  
27 94 as exempt.

28 95 **Author Contributions**

29  
30 96 Calvin Cohen assisted in development of the study design, evaluated and interpreted the  
31  
32 97 study results, and drafted and critically revised the manuscript text. Juliana Meyers and Keith  
33  
34 98 Davis assisted in development of the study design, obtained study funding, conducted all analytic  
35  
36 99 programming and statistical analyses, assisted with evaluation and interpretation of the study

37  
38 100 **Funding Statement**

39  
40 101 This study was funded by Gilead Sciences, which is conducting clinical research in and  
41  
42 102 markets current treatments for HIV/AIDS.

43 103 **Data Sharing**

44  
45 104 Raw data used for this study are unavailable for public sharing (per terms of the private data  
46  
47 105 use agreement governing original data acquisition).

48  
49 106 **Acknowledgments**

50  
51 107 The Authors would like to thank Francois Everhard (Gilead Sciences) for his support and  
52  
53 108 input on the study design and manuscript.

1  
2  
3  
4  
5  
6  
7  
8  
9  
10  
11  
12  
13  
14  
15  
16  
17  
18  
19  
20  
21  
22  
23  
24  
25  
26  
27  
28  
29  
30  
31  
32  
33  
34  
35  
36  
37  
38  
39  
40  
41  
42  
43  
44  
45  
46  
47  
48  
49  
50  
51  
52  
53  
54  
55  
56  
57  
58  
59  
60

## 109 INTRODUCTION

110 The 2012 Department of Health and Human Services guidelines state that there are four  
111 preferred regimens for initiating human immunodeficiency virus (HIV) treatment in adults.  
112 Furthermore, there are multiple alternatives to these four regimens.[1] Patients and their treating  
113 physicians can choose from among these four preferred regimens, using the criteria of greatest  
114 efficacy, safety, and simplicity. The latter category is important because regimen simplicity is  
115 associated with greater long-term adherence. For example, all four preferred regimens are  
116 constructed with a relatively low pill burden (i.e., between one and four tablets per day), and  
117 three of the four regimens have once-daily dosing. While randomized trials have compared the  
118 components of some of these four regimens with each other, to date no studies compared the four  
119 regimens to each other as they are prescribed (i.e., in a real-world setting), given that these study  
120 trials have been blinded.[2,3]

121 Adherence to antiretroviral therapy (ART) is essential for achieving durable clinical  
122 outcomes in patients with HIV. Patients with inadequate adherence to ART are at an increased  
123 risk for incomplete viral suppression; and unless a new suppressive regimen is quickly  
124 constructed to reestablish virologic suppression, viremia is associated with an increased risk of  
125 disease progression, and death.[4-8] It has been suggested that an ART adherence rate of at least  
126 95% is required to achieve a lower risk of virologic failure, fewer hospital days, and reduced  
127 morbidity and mortality in patients with HIV[8-9], although one previous study indicated that  
128 viral suppression may be possible at less than 95% adherence.[10] In the past several years, the  
129 availability of fixed-dose combinations and agents with prolonged half-lives have simplified pill  
130 burden and thus increased regimen adherence.[1,9,11] Several clinical trials and cohort studies  
131 support the conclusion that once-daily single tablet regimens (STR) can lead to significantly  
132 improved adherence, patient satisfaction, and virological outcomes.[10-13,12-15] For example,

Comment [k2]: Added citation for balance

1  
2  
3  
4  
5  
6  
7  
8  
9 133 among homeless or marginally housed patients, those receiving an ART regimen composed of a  
10 134 single tablet per day had better virologic outcomes and a 26% increase in adherence than patients  
11 135 receiving other multi-pill regimens.<sup>[1315]</sup> One recently published study analyzing a claims  
12 136 database noted that compared with various multi-pill regimens, a STR was associated with  
13 137 increased adherence (as determined by pharmacy refill data). Furthermore, the increased  
14 138 likelihood of complete adherence was associated with a 25% decrease in the rate of  
15 139 hospitalization.<sup>[1416]</sup>

16  
17  
18  
19  
20  
21  
22 140 In this study, we sought to assess how robust these findings were by analyzing similar  
23 141 metrics in a separate data set. The primary objective of this retrospective database analysis was  
24 142 to assess the effect association between of a single-tablet-per-day ART regimen and on treatment  
25 143 adherence, and all-cause hospitalization risk, and total all-cause health care costs -in a large  
26 144 population of Medicaid enrollees in the United States (US) who received treatment for HIV  
27 145 infection. The secondary objective of this study was to examine the association between STR  
28 146 and other types of all-cause health care utilization (emergency department, pharmacy, outpatient,  
29 147 and other service types) and costs.

1  
2  
3  
4  
5  
6  
7  
8  
9 148 **METHODS**

10  
11 149 Data for this analysis were taken from the MarketScan Medicaid Multi-State Database,  
12  
13 150 which contains health care claims from approximately 30 million Medicaid enrollees from  
14  
15 151 11 geographically dispersed states. The database includes patient-level demographics; periods of  
16  
17 152 Medicaid enrollment; primary and secondary diagnoses; and detailed information about  
18  
19 153 hospitalizations and therapeutic procedures, inpatient and outpatient physician services, and  
20  
21 154 prescription drug use. Each medical and pharmacy claim in the database also includes original  
22  
23 155 cost information, which represents direct paid amounts (in US dollars) from Medicaid to  
24  
25 156 providers for each service or prescription. In compliance with the Health Insurance and  
26  
27 157 Portability and Accountability Act of 1996, all data were de-identified to protect the privacy of  
28  
29 158 individual patients, physicians, and hospitals. Because the data were retrospective, pre-existing,  
30  
31 159 and de-identified, RTI International's institutional review board determined that this study met  
32  
33 160 all criteria for exemption from requirements of patient consent.

34 161 Patients were selected for inclusion if they received at least one HIV or AIDS diagnosis  
35  
36 162 (*International Classification of Diseases, 9th Revision, Clinical Modification* [ICD-9-CM] code  
37  
38 163 042.xx) between June 1, 2006, and December 31, 2009. Patients also were required to have  
39  
40 164 evidence of receipt of a complete ART regimen, defined as two nucleoside/nucleotide reverse  
41  
42 165 transcriptase inhibitors plus a third agent (i.e., another nucleoside/nucleotide reverse  
43  
44 166 transcriptase inhibitor, a nonnucleoside/nucleotide reverse transcriptase inhibitor, a protease  
45  
46 167 inhibitor [PI], a chemokine receptor R5 antagonist, or an integrase inhibitor). The first date of  
47  
48 168 receipt of a complete regimen was termed the index date. ART agents were identified in the  
49  
50 169 claims database by using National Drug Codes associated with relevant generic and brand  
51  
52 170 names. Patients also were required to remain on the complete ART regimen for at least 60 days  
53  
54 171 following their index dates and to have evidence of continuous enrollment in Medicaid during

1  
2  
3  
4  
5  
6  
7  
8  
9 172 this period. To assess treatment-naïve versus experienced status and baseline comorbidities,  
10 173 patients were required to have at least 6 months of pre-index date Medicaid enrollment, with  
11 174 enrollment information available from January 1, 2006 (i.e., 6 months before the earliest possible  
12 175 index date).

16 176 Patients were grouped into two mutually exclusive cohorts according to the daily pill count  
17 177 of their complete ART regimen. Patients were assigned to the STR cohort if they received an  
18 178 ART regimen consisting of a single tablet (i.e., an STR) at any point during the selection  
19 179 window, regardless of prior or subsequent use of other regimens. At the time of this study, only  
20 180 coformulated tenofovir/emtricitabine/efavirenz was available as an STR. Patients were assigned  
21 181 to the two-or-more-pills-per-day (2+PPD) cohort if they received a regimen consisting of two or  
22 182 more pills per day during the selection window and if they did not receive an STR at any point  
23 183 during that time.

31 184 Patients were followed from the start of their complete ART regimen (i.e., after June 1, 2006,  
32 185 the study index date) until the earliest date of regimen discontinuation, disenrollment from the  
33 186 health plan, or the end of the database (i.e., March 31, 2009). Furthermore, patients receiving  
34 187 2+PPD were allowed to change medications comprising the regimen, providing-provided that the  
35 188 patients continued to receive a combination of agents that could still be classified as a complete  
36 189 2+PPD regimen. Patients receiving STR were followed for as long as they remained on the STR.  
37 190 Discontinuation was defined as 60 consecutive days in which no refills were observed for any  
38 191 component of the regimen. Females with an ICD-9-CM diagnosis code indicating a pregnancy  
39 192 during the follow-up period were excluded from the analysis because the one available STR is  
40 193 not recommended for pregnant women, and hospitalizations for labor and delivery may have  
41 194 biased results in favor of the STR.

1  
2  
3  
4  
5  
6  
7  
8  
9 195 Patient characteristics measured at the index date included age, sex, and ART classes  
10 196 received (i.e., nucleoside/nucleotide reverse transcriptase inhibitors, nonnucleoside/nucleotide  
11 197 reverse transcriptase inhibitors, PIs, ritonavir boosting therapy, or other therapies). The presence  
12 198 of comorbid medical conditions other than HIV or AIDS were assessed during the 6-month pre-  
13 199 index period, using an established algorithm, the Charlson Comorbidity Index (CCI)  
14 200 score.<sup>[4517]</sup> This score is made up of 17 comorbidities (defined by ICD-9-CM diagnosis and  
15 201 procedure codes), such as myocardial infarction and chronic pulmonary disease, which are  
16 202 weighted to correspond to the severity of the comorbid condition of interest. A higher  
17 203 comorbidity score represents a higher overall comorbidity burden during the pre-index period.  
18 204 Additionally, the incidence of other concomitant mental disorders (ICD-9-CM codes 306.xx  
19 205 through 319.xx) and drug and alcohol abuse (ICD-9-CM codes 292.xx and 303.xx through  
20 206 305.xx) during the 6-month pre-index period also was assessed.

21 207 Medication adherence was assessed using the medication possession ratio (MPR), which has  
22 208 been shown to be the most widely adopted measure (57% of all studies) in published claims-  
23 209 based analyses of medication adherence <sup>[4618]</sup> and has been used in studies of ART adherence  
24 210 among individuals with HIV. <sup>[4719]</sup> The MPR, which is a proxy for refill compliance, generally  
25 211 measures the proportion of the ART exposure period in which supply was maintained for all  
26 212 ART components comprising the regimen. Specifically, MPR was calculated as the number of  
27 213 filled prescription days for all ART regimen components (using the days supplied in the  
28 214 pharmacy claims) divided by the number of days from the first observed prescription in the  
29 215 regimen through the earliest of either the exhaustion of the days supplied of the last observed  
30 216 prescription or the end of follow-up. For each patient in our study, the MPR was calculated over  
31 217 the period in which the patient remained on his or her ART regimen. For patients in the 2+PPD  
32 218 cohort, late refills and resulting days of missing supply for one or more ART components were

1  
2  
3  
4  
5  
6  
7  
8  
9 219 all factored against their adherence measurements. For example, patients in the 2+PPD cohort  
10 220 with a supply for only one of the ART components on a given day were considered to have zero  
11 221 adherence for that day. In addition to reporting the mean (standard deviation [SD]) MPR  
12 222 achieved, we also reported the numbers and percentages of patients achieving various adherence  
13 223 thresholds (i.e., MPRs of 1.0-0.95, 0.94-0.90, 0.89-0.85, and 0.84-0.80, corresponding to 100%-  
14 224 95%, 94%-90%, 89%-85%, and 84%-80% adherence, respectively).

15 225 To further understand adherence to ART regimens, for each patient in the 2+PPD cohort,  
16 226 complete (i.e., having a complete regimen), partial (i.e., receiving some but not all components  
17 227 of a complete regimen), and no medication days also were assessed. Specifically, we reported the  
18 228 percentage of days that each patient had complete, partial, and no medications available, along  
19 229 with the mean number of days that the patient had complete, partial and no medications.  
20 230 Additionally, we also reported the maximum number of consecutive days the patient had either  
21 231 an incomplete regimen or no medications available.

22 232 Hospitalizations were identified from the claims database using relevant place of service  
23 233 codes. Hospitalizations were observed from the index date until the earliest date of regimen  
24 234 discontinuation, end of enrollment in the health plan, or end of the database. The number and  
25 235 percentage of patients with at least one hospitalization were reported, along with the mean (SD)  
26 236 number of hospitalizations, and the mean (SD) number of inpatient days. Furthermore, we  
27 237 compared and reported the number of hospitalizations per 100 patient-years, along with the rate  
28 238 ratios and 95% confidence intervals, for both cohorts as well as by adherence status (at least 95%  
29 239 vs. less than 95%).

30 240 For each patient, overall health care utilization and associated costs were aggregated across  
31 241 all encounters, regardless of reason, that were observed during the follow-up period; we reported  
32 242 these costs by average and per-month amounts. The following categories of overall health care

1  
2  
3  
4  
5  
6  
7  
8  
9 243 utilization and costs were evaluated and reported: inpatient, emergency department, office visit,  
10 244 home health visit, laboratory service, pharmacy, other outpatient care, and total. For each  
11 245 category of overall health care, the number and percentage of patients, the mean (SD) number of  
12 246 visits per month, and monthly per-patient costs were reported. Additionally, for patients with an  
13 247 inpatient visit, the average number of inpatient days per month among patients with at least one  
14 248 stay during follow-up also was reported. All cost data, which represented payments incurred by  
15 249 the Medicaid system, were standardized at the claim level to 2010 US dollars using the medical  
16 250 care component of the US Consumer Price Index.

17  
18  
19  
20  
21  
22 251 All analyses were carried out using SAS (version 9; Cary, North Carolina) statistical  
23 252 software. Descriptive analyses were conducted for all outcome measures and included means and  
24 253 SDs for continuous variables of interest (e.g., MPR) and frequency distributions of categorical  
25 254 variables of interest (e.g., geographic region). All descriptive analyses were stratified by cohort.  
26 255 Health care costs were updated to 2010 US dollars using the medical care component of the  
27 256 consumer price index.

28 257 A generalized linear model with a log link and a Poisson distribution was estimated to assess  
29 258 the relationship between the number of pills per day and the number of hospitalizations observed  
30 259 during follow-up. The dependent variable was a count of hospitalizations during exposure to the  
31 260 ART regimen. Additionally, a generalized linear model with a log link and a negative binomial  
32 261 distribution were estimated to assess monthly health care costs, adjusted for the patient and  
33 262 treatment characteristics. The dependent variables were monthly total costs and monthly total  
34 263 costs excluding costs pharmacy costs. For both models, based on previous work by Sax et al.  
35 264 [16], independent variables included the following: treatment regimen received (i.e., STR vs.  
36 265 2+PPD), age, sex, CCI score, treatment-naïve status, pre-index presence of mental health  
37 266 disorders, pre-index presence of alcohol or drug abuse disorders, length of follow-up (in days,



1  
2  
3  
4  
5  
6  
7  
8  
9 267 hospital model only), and whether or not the patient met a 0.95 adherence threshold (cost model  
10 268 only). For the hospital model, incidence rate ratios (IRRs) were reported for all covariates, along  
11 269 with the mean predicted number of hospitalizations for patients receiving an STR versus patients  
12 270 receiving a 2+PPD. For the cost model, adjusted predicted mean costs were reported.  
13  
14  
15  
16  
17  
18  
19  
20  
21  
22  
23  
24  
25  
26  
27  
28  
29  
30  
31  
32  
33  
34  
35  
36  
37  
38  
39  
40  
41  
42  
43  
44  
45  
46  
47  
48  
49  
50  
51  
52  
53  
54  
55  
56  
57  
58  
59  
60

1  
2  
3  
4  
5  
6  
7  
8  
9 271 **RESULTS**

10  
11 272 A total of 7,381 patients met the selection criteria (Figure 1). Of these, 5,584 patients  
12  
13 273 (75.7%) received their ART regimen as 2+PPD; 1,797 patients (24.3%) received their ART  
14  
15 274 regimen as a STR. On average, patients were approximately 42 years of age. Approximately  
16  
17 275 46% of patients were female (Table 1). Across both cohorts, the average CCI score was  
18  
19 276 approximately the same (mean [SD]: 0.67 [1.38] among patients receiving an STR and 0.65  
20  
21 277 [1.36] among patients receiving 2+PPD). Furthermore, the incidence of concomitant mental  
22  
23 278 disorders and drug and alcohol abuse diagnoses did not vary substantially by cohort. Patients  
24  
25 279 receiving an STR had a mean regimen duration of 348 days; this was approximately 2.8 months  
26  
27 280 shorter than the mean regimen duration of 433 days observed for patients receiving 2+PPD.  
28  
281 Forty-seven percent of patients receiving an STR were treatment naïve, compared with 24.5% of  
29  
30 282 patients receiving 2+PPD.

31  
32 283 **Table 1. Characteristics of the study sample, by cohort.**

| Characteristic           | STR<br>(n = 1,797) |         | 2+PPD<br>(n = 5,584) |         | P Value |
|--------------------------|--------------------|---------|----------------------|---------|---------|
| All Patients (N, %)      | 1,797              | 100.00% | 5,584                | 100.00% |         |
| Age, mean (SD)           | 41.6               | (10.56) | 42.32                | (11.37) | 0.0137  |
| Age category (N, %)      | -                  | -       | -                    | -       |         |
| —Aged less than 18 years | 40                 | 2.23%   | 274                  | 4.85%   |         |
| —Aged 18 to 24 years     | 95                 | 5.29%   | 139                  | 2.49%   |         |
| —Aged 25 to 34 years     | 269                | 14.97%  | 664                  | 11.84%  |         |
| Aged 35 to 44 years      | 622                | 34.61%  | 1,975                | 35.37%  |         |
| Aged 45 to 54 years      | 594                | 32.89%  | 1,875                | 33.58%  |         |
| Aged 55 to 64 years      | 176                | 9.79%   | 638                  | 11.43%  |         |
| Aged 65+ years           | 4                  | 0.22%   | 25                   | 0.45%   |         |
| Gender (N, %)            |                    |         |                      |         |         |
| Male                     | 945                | 52.59%  | 3,063                | 54.85%  | 0.1123  |
| Female                   | 852                | 47.41%  | 2,521                | 45.15%  | 0.1439  |
| Race (N, %)              |                    |         |                      |         |         |
| White                    | 387                | 21.54%  | 1,221                | 21.87%  | 0.8893  |
| Black                    | 1,187              | 66.05%  | 3,658                | 65.51%  | 0.6877  |
| Hispanic                 | 18                 | 1.00%   | 82                   | 1.47%   | 0.7844  |

| Characteristic                                                            | STR<br>(n = 1,797) |          | 2+PPD<br>(n = 5,584) |          | P Value |
|---------------------------------------------------------------------------|--------------------|----------|----------------------|----------|---------|
| Other                                                                     | 204                | 11.35%   | 621                  | 11.12%   | 0.7846  |
| Unknown                                                                   | 1                  | 0.06%    | 2                    | 0.04%    | 0.8766  |
| <b>Basis of Medicaid Eligibility (N, %)</b>                               |                    |          |                      |          |         |
| Aged                                                                      | 1                  | 0.06%    | 8                    | 0.14%    | 0.5634  |
| Disabled                                                                  | 1,089              | 60.60%   | 4,071                | 72.90%   | <.0001  |
| Income                                                                    | 583                | 32.44%   | 1,159                | 20.76%   | <.0001  |
| Other                                                                     | 58                 | 3.23%    | 202                  | 3.61%    | 0.8710  |
| Unknown                                                                   | 65                 | 3.62%    | 141                  | 2.53%    | 0.0487  |
| <b>Medicare Eligibility (N, %)</b>                                        |                    |          |                      |          |         |
| Not dually eligible                                                       | 1,791              | 99.67%   | 5,558                | 99.53%   | 0.9987  |
| Dually eligible                                                           | 5                  | 0.28%    | 24                   | 0.43%    | 0.6523  |
| Unknown                                                                   | 1                  | 0.05%    | 2                    | 0.04%    | 0.9014  |
| Charlson comorbidity index score, mean (SD)                               | 0.67               | (1.38)   | 0.65                 | (1.36)   | 0.5919  |
| <b>Charlson comorbidities (N, %)</b>                                      |                    |          |                      |          |         |
| – Myocardial infarction                                                   | 11                 | 0.61%    | 44                   | 0.79%    |         |
| – Congestive heart failure                                                | 39                 | 2.17%    | 141                  | 2.53%    |         |
| – Peripheral vascular disease                                             | 14                 | 0.78%    | 58                   | 1.04%    |         |
| – Cardiovascular disease                                                  | 52                 | 2.89%    | 148                  | 2.65%    |         |
| – Dementia                                                                | 4                  | 0.22%    | 10                   | 0.18%    |         |
| – Chronic pulmonary disease                                               | 259                | 14.41%   | 704                  | 12.61%   |         |
| – Rheumatological disease                                                 | 11                 | 0.61%    | 23                   | 0.41%    |         |
| – Peptic ulcer disease                                                    | 9                  | 0.50%    | 25                   | 0.45%    |         |
| – Mild liver disease                                                      | 20                 | 1.11%    | 49                   | 0.88%    |         |
| – Severe liver disease                                                    | 117                | 6.51%    | 333                  | 5.96%    |         |
| – Diabetes mellitus without chronic complications                         | 145                | 8.07%    | 445                  | 7.97%    |         |
| – Diabetes mellitus with chronic complications                            | 16                 | 0.89%    | 89                   | 1.59%    |         |
| – Paraplegia                                                              | 6                  | 0.33%    | 34                   | 0.61%    |         |
| – Renal disease                                                           | 11                 | 0.61%    | 80                   | 1.43%    |         |
| – Cancer                                                                  | 82                 | 4.56%    | 221                  | 3.96%    |         |
| – Metastatic cancer                                                       | 11                 | 0.61%    | 26                   | 0.47%    |         |
| <b>Concomitant mental health and substance abuse comorbidities (N, %)</b> |                    |          |                      |          |         |
| Mental disorders                                                          | 382                | 21.26%   | 1,340                | 24.00%   | 0.0456  |
| Drug or alcohol abuse                                                     | 338                | 18.81%   | 856                  | 15.33%   | 0.0323  |
| Treatment naïve at index (N, %)                                           | 853                | 47.47%   | 1,366                | 24.46%   | <.0001  |
| Mean (SD) rRegimen length, mean (SD)                                      | 348.17             | (259.32) | 433.46               | (351.50) | <.0001  |
| <b>Index medications (N, %)</b>                                           |                    |          |                      |          |         |
| NRTI                                                                      | 1,797              | 100.00%  | 5,584                | 100.00%  | ---     |
| NNRTI                                                                     | 1,797              | 100.00%  | 1,500                | 26.86%   | <.0001  |
| PI                                                                        | ---                | ---      | 4,064                | 72.78%   | ---     |

1  
2  
3  
4  
5  
6  
7  
8  
9  
10  
11  
12  
13  
14  
15  
16  
17  
18  
19  
20  
21  
22  
23  
24  
25  
26  
27  
28  
29  
30  
31  
32  
33  
34  
35  
36  
37  
38  
39  
40  
41  
42  
43  
44  
45  
46  
47  
48  
49  
50  
51  
52  
53  
54  
55  
56  
57  
58  
59  
60

| Characteristic          | STR<br>(n = 1,797) |     | 2+PPD<br>(n = 5,584) |        | P Value |
|-------------------------|--------------------|-----|----------------------|--------|---------|
| Kaletra at index        | ---                | --- | 1,633                | 40.18% | ---     |
| Boosted PI at index     | ---                | --- | 1,664                | 40.94% | ---     |
| Non-boosted PI at index | ---                | --- | 767                  | 18.87% | ---     |
| PE                      | ---                | --- | 1,712                | 30.66% | ---     |
| Other                   | ---                | --- | 87                   | 1.56%  | ---     |

NOTE. 2+PPD = two or more pills per day; NNRTI = nonnucleoside/nucleotide reverse transcriptase inhibitor; NRTI = nucleoside/nucleotide reverse transcriptase inhibitor; PE = pharmacokinetic enhancer; PI = protease inhibitor; SD = standard deviation; STR = once-daily single-tablet regimen.

Patients receiving an STR had significantly better adherence than patients receiving 2+PPD (Table 2). Approximately 25.3% of patients receiving an STR achieved 95% adherence or greater, compared with 17.4% of patients receiving 2+PPD ( $P \leq 0.0001$ ). Mean (SD) MPR was 0.84 (0.14) among patients receiving an STR and 0.80 (0.15) among patients receiving 2+PPD (Table 2). Patients in the 2+PPD cohort received a complete regimen for 80.3% of the follow-up period (mean [SD]: 361.9 [315.0] days), a partial regimen for 5.6% of the follow-up period (mean [SD]: 22.2 [45.6] days), and no available medications for 14.1% of the follow-up period (mean [SD]: 49.4 [57.1] days) (Table 3). Alternatively, patients in the STR cohort received a complete regimen for 84.4% of the follow-up period (mean [SD]: 299.4 [234.6] days) and no available medications for 15.6% of the follow-up period (mean [SD]: 48.8 [54.2] days), which was a similar percentage of days as patients receiving 2+PPD. Patients receiving an STR had, on average, a maximum of 19.5 (SD: 15.9) consecutive days without a complete regimen (i.e., either a partial regimen or no medications available); patients receiving 2+PPD had, on average, a maximum of 23.9 (SD: 16.7) consecutive days without a complete regimen.

**Table 2. Adherence to antiretroviral therapy, by cohort.**

| Cohort | Number of Patients | Mean (SD) MPR | MPR/Persistence Ratio (N, %) |             |             |             |            |
|--------|--------------------|---------------|------------------------------|-------------|-------------|-------------|------------|
|        |                    |               | <0.8                         | 0.8 - <0.85 | 0.85 - <0.9 | 0.9 - <0.95 | 0.95 - 1   |
| STR    | 1,797              | 0.84 (0.14)   | 537 29.88%                   | 178 9.91%   | 243 13.52%  | 385 21.42%  | 454 25.26% |
| 2+PPD  | 5,584              | 0.80 (0.15)   | 2,255 40.38%                 | 621 11.12%  | 779 13.95%  | 957 17.14%  | 972 17.41% |

1  
2  
3  
4  
5  
6  
7  
8  
9  
10  
11  
12  
13  
14  
15  
16  
17  
18  
19  
20  
21  
22  
23  
24  
25  
26  
27  
28  
29  
30  
31  
32  
33  
34  
35  
36  
37  
38  
39  
40  
41  
42  
43  
44  
45  
46  
47  
48  
49  
50  
51  
52  
53  
54  
55  
56  
57  
58  
59  
60

| Cohort            | Number of Patients | Mean (SD) MPR | MPR/Persistence Ratio (N, %) |             |              |              |              |
|-------------------|--------------------|---------------|------------------------------|-------------|--------------|--------------|--------------|
|                   |                    |               | <0.8                         | 0.8 - <0.85 | 0.85 - <0.9  | 0.9 - <0.95  | 0.95 - 1     |
| Overall           | 7,381              | 0.81 (0.15)   | 2,792 37.83%                 | 799 10.83%  | 1,022 13.85% | 1,342 18.18% | 1,426 19.32% |
| P-Value (1 vs. 2) |                    | <.0001        | <.0001                       | 0.1491      | 0.6477       | <.0001       | <.0001       |

NOTE. 2+PPD = two or more pills per day; MPR = medication possession ratio; SD = standard deviation; STR = once-daily single-tablet regimen.

**Table 3. Summary of incomplete adherence, by cohort.**

| Adherence Characteristic                                   | STR<br>(n = 1,797) | 2+PPD<br>(n = 5,584) | P Value |
|------------------------------------------------------------|--------------------|----------------------|---------|
| Percentage of days with complete adherence                 | 84.42%             | 80.37%               | <.0001  |
| Percentage of days with partial adherence                  | ---                | 5.56%                | ---     |
| Percentage of days with no ART medications                 | 15.58%             | 14.07%               | 0.0356  |
| Complete adherence days, mean (SD)                         | 299.36 (234.56)    | 361.87 (315.03)      | <.0001  |
| Partial adherence days, mean (SD)                          | ---                | 22.24 (45.58)        | ---     |
| Days with no medication available, mean (SD)               | 48.81 (54.24)      | 49.35 (57.11)        | 0.0356  |
| Total follow-up duration, mean (SD)                        | 348.17 (259.31)    | 433.46 (351.50)      | <.0001  |
| Maximum consecutive gap in therapy, <sup>a</sup> mean (SD) | 19.48 (15.89)      | 23.92 (16.67)        | <.0001  |

NOTE. 2+PPD = two or more pills per day; ART = antiretroviral therapy; SD = standard deviation; STR = once-daily single-tablet regimen.

<sup>a</sup> Represents either days with a partial regimen or days with no medications.

Among patients receiving an STR, 21.0% had at least one hospitalization, compared with 24.4% of patients receiving 2+PPD ( $P = 0.003$ ) (Table 4). Among patients with a hospitalization, patients receiving an STR had numerically similar, although significantly fewer, hospitalizations over all available follow-up, when compared with patients receiving 2+PPD (mean [SD]: 1.9 [1.6] among patients receiving an STR vs. 2.1 [2.2] among patients receiving 2+PPD;  $P = 0.001$ ).

**Table 4. All-cause average monthly per patient health care utilization and costs, by cohort.**

**Comment [k3]:** Removed this because hospitalization use (not cost) data are shown for all available follow-up.

| Resource Used    | STR<br>(n = 1,797) | 2+PPD<br>(n = 5,584) | P-Value |
|------------------|--------------------|----------------------|---------|
| Hospitalizations |                    |                      |         |

| Resource Used                                                                 | STR<br>(n = 1,797) |            | 2+PPD<br>(n = 5,584) |            | P-Value |
|-------------------------------------------------------------------------------|--------------------|------------|----------------------|------------|---------|
| Had ≥ 1 hospital admission (N, %) <sup>a</sup>                                | 378                | 21.04%     | 1,365                | 24.44%     | 0.0031  |
| Number of hospitalizations <u>(over all follow-up)</u> <sup>b</sup> mean (SD) | 1.88               | (1.59)     | 2.1                  | (2.23)     | 0.0012  |
| Inpatient days <u>(over all follow-up)</u> <sup>b</sup> mean (SD)             | 9.99               | (12.33)    | 12.33                | (18.90)    | 0.0228  |
| Number of admissions per month                                                | -                  | -          | -                    | -          | -       |
| Mean (Std. Dev)                                                               | 0.05               | (0.00)     | 0.05                 | (0.15)     | 0.1429  |
| Median                                                                        | 0                  | -          | 0                    | -          | -       |
| Range (Min, Max)                                                              | 0                  | 2          | 0                    | 1.07       | -       |
| Days in hospital per month <sup>c</sup>                                       | -                  | -          | -                    | -          | -       |
| Mean (SD)                                                                     | 1.32               | (2.21)     | 1.45                 | (2.71)     | 0.3975  |
| Median                                                                        | 0.58               | -          | 0.5                  | -          | -       |
| Range (Min, Max)                                                              | 0.03               | 21.5       | 0.03                 | 32.43      | -       |
| Costs <u>per month, mean (SD)</u>                                             | \$834-             | (\$4,480)- | \$1,152-             | (\$5,212)- | 0.0203- |
| Mean (Std. Dev)                                                               | \$834              | (\$4,480)  | \$1,152              | (\$5,212)  | 0.0203  |
| Median                                                                        | \$0                | -          | \$0                  | -          | -       |
| Range (Min, Max)                                                              | \$0                | \$143,530  | \$0                  | \$97,626   | -       |
| Emergency Room (ER)                                                           |                    |            |                      |            |         |
| Had ≥ 1 ER visit (N, %) <sup>a</sup>                                          | 903                | 50.25%     | 2,749                | 49.23%     | 0.4517  |
| Number of visits <u>per month, mean (SD)</u>                                  | 0.97-              | (3.00)-    | 1.01-                | (2.99)-    | 0.6107- |
| Mean (Std. Dev)                                                               | 0.97               | (3.00)     | 1.01                 | (2.99)     | 0.6107  |
| Median                                                                        | 0.03               | -          | 0                    | -          | -       |
| Range (Min, Max)                                                              | 0                  | 67         | 0                    | 89.94      | -       |
| Costs <u>per month, mean (SD)</u>                                             | \$45-              | (\$160)-   | \$46-                | (\$135)-   | 0.873-  |
| Mean (Std. Dev)                                                               | \$45               | (\$160)    | \$46                 | (\$135)    | 0.873   |
| Median                                                                        | \$0                | -          | \$0                  | -          | -       |
| Range (Min, Max)                                                              | \$0                | \$3,063    | \$0                  | \$4,161    | -       |
| Office Visits (Primary Care) (N, %)                                           |                    |            |                      |            |         |
| Had ≥ 1 office visit (N, %) <sup>a</sup>                                      | 1,509              | 83.97%     | 4,699                | 84.15%     | 0.8576  |
| Number of visits <u>per month, mean (SD)</u>                                  | 1.52-              | (3.00)-    | 1.43-                | (2.19)-    | 0.1669- |
| Mean (Std. Dev)                                                               | 1.52               | (3.00)     | 1.43                 | (2.19)     | 0.1669  |
| Median                                                                        | 0.92               | -          | 0.86                 | -          | -       |
| Range (Min, Max)                                                              | 0                  | 64         | 0                    | 40.30      | -       |
| Costs <u>per month, mean (SD)</u>                                             | \$75-              | (\$229)-   | \$70-                | (\$291)-   | 0.5087- |
| Mean (Std. Dev)                                                               | \$75               | (\$229)    | \$70                 | (\$291)    | 0.5087  |
| Median                                                                        | \$30               | -          | \$26                 | -          | -       |
| Range (Min, Max)                                                              | \$0                | \$5,012    | \$0                  | \$15,499   | -       |
| Home Health (N, %)                                                            |                    |            |                      |            |         |
| Had ≥ 1 home health visit (N, %) <sup>a</sup>                                 | 504                | 28.05%     | 1,861                | 33.33%     | <.0001  |
| Number of visits <u>per month, mean (SD)</u>                                  | 0.64-              | (3.00)-    | 0.79-                | (3.16)-    | 0.0625- |
| Mean (Std. Dev)                                                               | 0.64               | (3.00)     | 0.79                 | (3.16)     | 0.0625  |
| Median                                                                        | 0                  | -          | 0                    | -          | -       |

| Resource Used                                       | STR<br>(n = 1,797) |            | 2+PPD<br>(n = 5,584) |            | P-Value |
|-----------------------------------------------------|--------------------|------------|----------------------|------------|---------|
| Range (Min, Max)                                    | 0                  | 45         | 0                    | 43.06      | -       |
| Costs per month, mean (SD)                          | \$47-              | (\$198)-   | \$88-                | (\$642)-   | 0.007-  |
| Mean (Std. Dev)                                     | \$47               | (\$198)    | \$88                 | (\$642)    | 0.007   |
| Median                                              | \$0                | -          | \$0                  | -          | -       |
| Range (Min, Max)                                    | \$0                | \$4,142    | \$0                  | \$36,653   | -       |
| Laboratory (N, %)                                   |                    |            |                      |            |         |
| Had ≥ 1 lab order (N, %) <sup>a</sup>               | 1,168              | 65.00%     | 3,530                | 63.22%     | 0.1722  |
| Number of claimslab tests per month, mean (SD)      | 1.24-              | (2.00)-    | 1.19-                | (1.69)-    | 0.2962- |
| Mean (Std. Dev)                                     | 1.24               | (2.00)     | 1.19                 | (1.69)     | 0.2962  |
| Median                                              | 0.66               | -          | 0.57                 | -          | -       |
| Range (Min, Max)                                    | 0                  | 16         | 0                    | 19.96      | -       |
| Costs per month, mean (SD)                          | \$52-              | (\$94)-    | \$46-                | (\$120)-   | 0.0401- |
| Mean (Std. Dev)                                     | \$52               | (\$94)     | \$46                 | (\$120)    | 0.0401  |
| Median                                              | \$20               | -          | \$17                 | -          | -       |
| Range (Min, Max)                                    | \$0                | \$1,689    | \$0                  | \$7,246    | -       |
| Pharmacy (N, %)                                     |                    |            |                      |            |         |
| Had ≥ 1 pharmacy claim (N, %) <sup>a</sup>          | 1,797              | 100.00%    | 5,584                | 100.00%    | ---     |
| Number of claimsprescriptions per month, mean (SD)  | 4.99-              | (4.00)-    | 6.73-                | (4.05)-    | <.0001- |
| Mean (Std. Dev)                                     | 4.99               | (4.00)     | 6.73                 | (4.05)     | <.0001  |
| Median                                              | 3.96               | -          | 5.76                 | -          | -       |
| Range (Min, Max)                                    | 0.37               | 27         | 0.69                 | 37.17      | -       |
| Costs per month, mean (SD)                          | \$1,593-           | (\$1,105)- | \$1,779-             | (\$1,307)- | <.0001- |
| Mean (Std. Dev)                                     | \$1,593            | (\$1,105)  | \$1,779              | (\$1,307)  | <.0001  |
| Median                                              | \$1,494            | -          | \$1,617              | -          | -       |
| Range (Min, Max)                                    | \$0                | \$27,034   | \$0                  | \$54,232   | -       |
| OP/ancillary (N, %)                                 |                    |            |                      |            |         |
| Had ≥ 1 other OP/ancillary (N, %) <sup>a</sup>      | 1,754              | 97.61%     | 5,469                | 97.94%     | 0.3957  |
| Number of visits per month, mean (SD)               | 0.15-              | (0.00)-    | 0.14-                | (0.13)-    | 0.0078- |
| Mean (Std. Dev)                                     | 0.15               | (0.00)     | 0.14                 | (0.13)     | 0.0078  |
| Median                                              | 0.12               | -          | 0.11                 | -          | -       |
| Range (Min, Max)                                    | 0                  | 4          | 0                    | 0.52       | -       |
| Costs per month, mean (SD)                          | \$313-             | (\$607)-   | \$363-               | (\$733)-   | 0.0087- |
| Mean (Std. Dev)                                     | \$313              | (\$607)    | \$363                | (\$733)    | 0.0087  |
| Median                                              | \$139              | -          | \$159                | -          | -       |
| Range (Min, Max)                                    | \$0                | \$8,946    | \$0                  | \$15,936   | -       |
| Total Health Care Utilization & and Costs           |                    |            |                      |            |         |
| Had ≥ 1 medical visit/encounter (N, %) <sup>a</sup> | 1,797              | 100.00%    | 5,584                | 100.00%    | ---     |
| Number of total encounters per month, mean (SD)     | 14.69-             | (14.00)-   | 16.97-               | (13.72)-   | <.0001- |
| Mean (Std. Dev)                                     | 14.69              | (14.00)    | 16.97                | (13.72)    | <.0001  |
| Median                                              | 11.34              | -          | 13.13                | -          | -       |

| Resource Used              | STR<br>(n = 1,797) |            | 2+PPD<br>(n = 5,584) |            | P-Value |
|----------------------------|--------------------|------------|----------------------|------------|---------|
| Range (Min, Max)           | 0.56               | 250        | 0.96                 | 232.02     | -       |
| Costs per month, mean (SD) | \$2,959-           | (\$4,962)- | \$3,544-             | (\$5,811)- | 0.0001- |
| Mean (Std. Dev)            | \$2,959            | (\$4,962)  | \$3,544              | (\$5,811)  | 0.0001  |
| Median                     | \$1,916            | -          | \$2,182              | -          | -       |
| Range (Min, Max)           | \$0                | \$146,367  | \$0                  | \$103,103  | -       |

NOTE: SD = standard deviation.

<sup>a</sup>Estimated over all available follow-up.

<sup>b</sup>Among hospitalized patients.

<sup>c</sup>Among patients with at least one admission over all follow-up.

The multivariate Poisson regression model showed that receiving an STR was associated with a significantly lower risk of hospitalization rate than receiving the 2+PPD regimen (IRR = 0.8457;  $P < 0.001$ ) (Table 5). When the received regimen type was controlled for, we found that patients were significantly more likely to be hospitalized if they had the following characteristics: a concomitant mental disorder diagnosis (vs. no concomitant mental disorder diagnosis; IRR = 1.2917;  $P < 0.001$ ), a concomitant drug or alcohol abuse diagnosis (vs. no concomitant drug or alcohol abuse diagnosis; IRR = 2.0357;  $P < 0.001$ ), a CCI score greater than 1 (IRR increased with increasing CCI score, from 2.3779 among patients with a CCI between 1 and 2 to 2.6432 among patients with a CCI greater than 3; all  $P < 0.001$ ), were female (vs. male; IRR = 1.1069;  $P = 0.003$ ), or were older than 35 years (vs. younger than 35 years; IRR increased with increasing age, up to 54 years, from 1.2482 among patients aged 35-44 years to 1.555 among patients aged 45-54 years; both  $P < 0.1$ ). Additionally, the likelihood of a hospitalization increased slightly with each additional day of follow-up (IRR = 1.0013;  $P < 0.0001$ ). Finally, being treatment naïve prior to index was predictive of an approximately 13% higher hospitalization rate as compared with being treatment experienced (IRR = 1.1270;  $P = 0.0033$ ).



341

342 **Table 5. Predictors of hospitalization, using multivariate Poisson regression, and**  
 343 **controlling for treatment cohort.**

| Specification: Adherence Covariate Excluded                                         | Poisson Count Model |                      |         |
|-------------------------------------------------------------------------------------|---------------------|----------------------|---------|
|                                                                                     | Parameter Estimate  | Incidence Rate Ratio | P-Value |
| Received a STR (vs. 2+PPD regimen)                                                  | -0.1654             | 0.8475               | 0.0001  |
| Female (vs. male)                                                                   | 0.1003              | 1.1069               | 0.003   |
| Age (vs. less than 35)                                                              |                     |                      |         |
| 35 to 44 years                                                                      | 0.1016              | 1.2482               | 0.0669  |
| 45 to 54 years                                                                      | 0.2217              | 1.5550               | <.0001  |
| 55+ years                                                                           | 0.4415              | 1.1056               | <.0001  |
| Charlson comorbidity index score (vs. Charlson comorbidity index score less than 1) |                     |                      |         |
| Between 1 and 2                                                                     | 0.8662              | 2.3779               | <.0001  |
| Greater than 2                                                                      | 0.972               | 2.6432               | <.0001  |
| Treatment naïve (vs. treatment experienced)                                         | 0.1196              | 1.1270               | 0.0033  |
| Had a mental disorder diagnosis (vs. no mental disorder diagnosis)                  | 0.256               | 1.2917               | <.0001  |
| Had a drug or alcohol abuse diagnosis (vs. no drug or alcohol abuse diagnosis)      | 0.7109              | 2.0357               | <.0001  |
| Length of follow-up (in days)                                                       | 0.0013              | 1.0013               | <.0001  |

344 NOTE. 2+PPD = two or more pills per day; STR = once-daily single-tablet regimen.

345

346 From the Poisson regression analysis described above, we found the adjusted rate of  
 347 hospitalization to be significantly lower for patients receiving an STR than for patients receiving  
 348 2+PPD (i.e., 39.5 hospitalizations per 100 patient-years ~~receiving for patients receiving~~ STR vs.  
 349 51.2 hospitalizations per 100 patient-years ~~for those~~ receiving 2+PPD) (Figure 2). These  
 350 adjusted hospitalization rates translated to a 23% lower risk of hospitalization among patients  
 351 receiving an STR, compared with patients receiving 2+PPD. As shown in Figure 3, adherence  
 352 status seems to be a key mechanism mediating hospitalization risk as patients with at least 95%  
 353 adherence (regardless of regimen type) had a statistically significant lower hospitalization rate

1  
2  
3  
4  
5  
6  
7  
8  
9  
10  
11  
12  
13  
14  
15  
16  
17  
18  
19  
20  
21  
22  
23  
24  
25  
26  
27  
28  
29  
30  
31  
32  
33  
34  
35  
36  
37  
38  
39  
40  
41  
42  
43  
44  
45  
46  
47  
48  
49  
50  
51  
52  
53  
54  
55  
56  
57  
58  
59  
60

354 compared to patients with less than 95% adherence. Improved adherence among patients treated  
355 with STR therefore appears to confer a lower risk of hospitalization and associated costs.

356 Examining other types of health care utilization. The percentage of patients with at least one  
357 home health visit was significantly lower among patients receiving STR than for patients  
358 receiving 2+PPD (Table 4). Between the two cohorts, no differences were observed in the  
359 percentage of patients with at least one emergency room, office visit, or laboratory claim.  
360 Similarly, no significant differences were found in the number of emergency room, office visits,  
361 home health visits, or laboratory claims per month. However, patients who received an STR had  
362 significantly lower costs per month associated with inpatient, home health, laboratory, pharmacy,  
363 other, and total health care than patients receiving 2+PPD. Mean (SD) total health care costs per  
364 month were \$2,959 (\$4,962) among patients receiving an STR and \$3,544 (\$5,811) among  
365 patients receiving 2+PPD; thus, patients receiving an STR accrued, on average per month, \$585  
366 less than patients receiving 2+PPD ( $P < 0.001$ ). The largest difference in costs between the two  
367 cohorts was observed for inpatient admissions (\$317 more for patients receiving 2+PPD),  
368 followed by pharmacy costs (\$187 more for patients receiving 2+PPD).

369 When monthly health care costs were adjusted for demographic, clinical, and treatment  
370 characteristics, patients receiving an STR had monthly total costs averaging \$2,947; patients  
371 receiving 2+PPD had monthly total costs averaging \$3,549 (Figure 34). Thus, patients receiving  
372 2+PPD had \$602 more in monthly health care costs, which corresponded to a 17% reduction in  
373 costs associated with STR. Additionally, when monthly health care costs, excluding pharmacy  
374 costs, were adjusted for demographic, clinical, and treatment characteristics, patients receiving  
375 an STR had monthly total costs averaging \$1,370; patients receiving 2+PPD had monthly total  
376 costs averaging \$1,797. Thus, patients receiving 2+PPD had \$427 more in adjusted monthly  
377 health care costs, which corresponded to a 23.8% reduction in costs associated with STR.

1  
2  
3  
4  
5  
6  
7  
8  
9 378 **DISCUSSION**

10 379 This retrospective database analysis examined adherence to ART regimens among patients  
11  
12 380 with HIV infection, using pharmacy refill dates as the best available proxy for pill-taking  
13  
14 381 behavior. One advantage to this method is that we can identify those patients who may not have  
15  
16 382 had all or some of their medications available on any given date based on an analysis of the  
17  
18 383 timing in between refills, which also notes the amount of medication dispensed each time. The  
19  
20 384 rate of hospitalization and correlates of hospitalization also were assessed from these claims data  
21  
22 385 and should be highly accurate, as should the overall monthly health care utilization and costs.  
23

24 386 This analysis largely confirms the previous report from Sax et al.<sup>[416]</sup>: we found that  
25  
26 387 patients receiving an STR had significantly better adherence rates than patients receiving  
27  
28 388 multiple pills per day. Our other finding was that higher rates of adherence were associated with  
29  
30 389 similar or lower rates of hospitalization, regardless of the regimen; less-than-complete adherence  
31  
32 390 was associated with higher rates of hospitalization and overall costs. Thus, multiple-pill regimens  
33  
34 391 were associated both with lower rates of complete adherence and correspondingly higher overall  
35  
36 392 health care costs. We observed a significantly higher rate of hospitalizations occurring in patients  
37  
38 393 receiving multiple-pill regimens ( $P < 0.001$ ) than in patients receiving an STR. The greater total  
39  
40 394 health care costs were due to differences in both the pharmacy costs of the regimen components  
41  
42 395 as well as the costs of hospitalizations and associated care. Therefore, one implication of our  
43  
44 396 findings is that choosing a multiple-pill regimen for its cost alone might inadvertently result in  
45  
46 397 little to no total health care cost-savings for a payer, given the potential risk of more frequent  
47  
48 398 hospitalizations in patients receiving multiple-pill regimens.

49 399 Similar to previous studies <sup>[420,421]</sup>, we found that patients who were adherent to therapy  
50  
51 400 were less likely to be hospitalized. Our data demonstrated similar rates of hospitalizations among  
52  
53 401 patients with the highest levels of complete adherence—at least 95%. This was consistent across  
54

1  
2  
3  
4  
5  
6  
7  
8  
9 402 both treatment cohorts. This finding suggests that the differences observed in the rates of  
10 403 hospitalizations across regimens are primarily due to differences in adherence rates between the  
11 404 STR and 2+PPD regimens rather than any concerns for toxicities. This finding also may partially  
12 405 address the potential contribution of channeling bias, a concern with any observational data set.  
13  
14 406 We found that adherent patients on any regimen have similar rates of hospitalization, which  
15 407 suggests that there may not have been a consistent bias to prescribe to more clinically  
16 408 immunosuppressed patients or to patients who were at greater risk for hospitalization due to  
17 409 other factors than a multiple-pill regimen. Furthermore, we found that the outcome of fewer  
18 410 hospitalizations for patients receiving an STR was consistent when we compared hospitalization  
19 411 risks for treatment-naïve patients with hospitalization risks for treatment-experienced patients. In  
20 412 the latter group, the impact of stage of illness prior to treatment would be lessened, given the  
21 413 impact of prior treatment on improving pretreatment immunosuppression, with an STR regimen.  
22 414 Of final note regarding channeling bias, previous analyses of Medicaid beneficiaries with HIV  
23 415 have shown that patients receiving ART are completely non-adherent (i.e., days with no ART  
24 416 supply/coverage on hand) for approximately 14% of their regimen duration regardless of the  
25 417 number of pills in the regimen [2220]. This finding suggests that clinicians are not channeling  
26 418 more adherent patients to STRs. Together, these data support the observation that facilitating  
27 419 greater adherence to ART at any stage of illness may result in reducing hospitalization risk.  
28  
29  
30  
31  
32  
33  
34  
35  
36  
37  
38  
39  
40  
41  
42

43 420 One follow-up question our study findings raises is whether the observed reduction in  
44 421 hospitalization risk and costs with STR was also due to less prevalent chronic comorbidities in  
45 422 patients prescribed STR. To assess this possibility, we replicated key descriptive analyses on  
46 423 hospitalization rates for patients with no baseline comorbidities as reported by the CCI. We  
47 424 found that the majority (~70%) of both STR and 2+PPD patients had no other CCI  
48 425 comorbidities. Among STR patients with no other comorbidities from the CCI, 13.9% had a  
49  
50  
51  
52  
53  
54

1  
2  
3  
4  
5  
6  
7  
8  
9 426 hospitalization compared with 18.3% of 2+PPD patients with no other comorbidities. Further,  
10 427 among STR patients with no comorbidities, 11.4% of adherent patients had a hospitalization  
11 428 compared with 14.7% of non-adherent patients. Similarly, among 2+PPD patients with no  
12 429 comorbidities, 12.4% of adherent patients had a hospitalization compared with 19.7% of non-  
13 430 adherent patients. Results of this sensitivity analysis, combined with the observation that the vast  
14 431 majority of patients in our study had no major comorbidities (from the CCI) requiring other  
15 432 chronic treatment, suggest that the observed association between poorer adherence and higher  
16 433 hospitalization was likely due to reduced ART adherence and not due to reduced adherence with  
17 434 other medications patients were taking.

25  
26 435 There were several measurable differences present in the study population at baseline. Our  
27 436 study attempted to control for effects these differences may have had on rates of ~~adherence and~~  
28 437 hospitalization ~~between STR and 2+PPD patients~~. We used multivariate regressions to control  
29 438 for patient demographics, treatment characteristics (i.e., treatment naïve vs. experienced, type of  
30 439 ART received, ~~year the ART was received~~), and clinical characteristics (i.e., CCI score,  
31 440 concomitant mental disorder, drug and alcohol abuse diagnoses). We found ~~that~~ a number of  
32 441 factors were associated with an increased risk of ~~poor adherence hospitalization independent of~~  
33 442 ~~treatment regimen~~, including having a CCI score greater than ~~3~~1; having a ~~concomitant~~ drug or  
34 443 alcohol abuse diagnosis; ~~having a concomitant mental health disorder; being female and of older~~  
35 444 ~~age~~; and being treatment ~~experienced~~naïve. ~~Similarly, having a CCI score greater than 1, or~~  
36 445 ~~having a concomitant mental disorder or drug or alcohol abuse diagnosis were associated with an~~  
37 446 ~~increased risk of hospitalization.~~

38  
39 447 ~~Nevertheless, Even~~ after controlling for these ~~se~~ factors ~~noted above~~, we still detected an  
40 448 independent ~~effect association~~ of ~~the~~ regimen ~~type~~ with hospitalization rates and, in fact,  
41 449 ~~observed an increase in the apparent protective effect of STR based on the predicted, adjusted~~

Comment [k4]: Did not notice this typo in earlier drafts. This should have said "hospitalization."

1  
2  
3  
4  
5  
6  
7  
8  
9 450 hospitalization rate derived from the Poisson model (39.5 per 100 patients in the STR group vs.  
10 451 51.2 per 100 patients in the 2+PPD group; see Figure 2). One possible explanation for this  
11 452 difference is that the Poisson model corrected a substantial imbalance in the proportion of  
12 453 patients who were treatment naïve at index (47.5% of STR patients vs. 24.5% of 2+PPD  
13 454 patients). Lack of or naivety to ART exposure has been shown in some studies to be a positive  
14 455 predictor of hospitalization in HIV patients [23], perhaps because approximately one-third of  
15 456 HIV patients wait to seek care until their disease has progressed to the point that they need acute  
16 457 treatment. [24, 25] As noted in a recent study by Metsch et al. [26], these patients often obtain  
17 458 initial care in emergency departments and hospital inpatient wards, and they tend not to  
18 459 persistent with follow-up outpatient care. This pattern of treatment induction may further  
19 460 increase their risk of infection and re-hospitalization in the short-term. Because being treatment  
20 461 naïve was shown in our data to be predictive of hospitalization, the Poisson model's adjustment  
21 462 for the overrepresentation of treatment naivety in the STR group may therefore have resulted in  
22 463 the larger difference between STR and 2+PPD in hospitalizations than observed in the crude,  
23 464 unadjusted comparison.

24 465 One hypothesis for a plausible mechanism by which these outcomes observed in our study  
25 466 could occur stems from observations in the SMART study.[24-27] That study, comparing  
26 467 continuous antiviral treatment versus periodic treatment interruptions, demonstrated that HIV  
27 468 treatment interruptions that were of sufficient length of time to lead to recurrent HIV viremia  
28 469 were associated with a significantly higher risk of all-cause morbidity and mortality. Our  
29 470 analysis was consistent with those findings: the mean maximum duration of nonadherence was  
30 471 about 3 weeks, which is a sufficient length of time to expect a return of HIV viremia. The  
31 472 SMART study noted that the higher risk of illness was not necessarily proximal to the time of the  
32 473 interruption but was observed for months afterwards. While there are differences between the

1  
2  
3  
4  
5  
6  
7  
8  
9 474 SMART study design and population and our study population, our findings are consistent with  
10 475 SMART and with what might be expected in a population who periodically are without antivirals  
11 476 for an average time of more than 3 weeks. Of note, short cycle interruptions of 2 days were not  
12 477 associated with virologic rebound in patients receiving the STR that was used in the SMART  
13 478 study [2228]. Therefore, our finding that the typical interruptions were much longer than this is  
14 479 supportive of a mechanism that could have resulted in increased patient morbidity.

20 480 It is also important to note that patients in this study generally were reasonably adherent to  
21 481 ART, with a mean adherence of just over 80% regardless of the number of pills received per day.  
22 482 This rate of adherence is consistent with other published reports of adherence, although other  
23 483 reports found even higher adherence rates to an STR.[413,4214] Furthermore, the difference  
24 484 observed in our study between the STR and 2+PPD regimens (approximately 4%) is consistent  
25 485 with what was observed by Sax et al. of 2.2%.[4416] This difference is also consistent with the  
26 486 differences in adherence rates reported when comparing average improvement between once-  
27 487 daily and twice-daily regimens (2.9%).[2329] It is important to note that there also were highly  
28 488 nonadherent patients to both the STR and the 2+PPD regimes in this study population,  
29 489 supporting the generalizability of this population.

39 490 Of further note, the differences observed in our study were associated with factors that  
40 491 typically are not present during randomized clinical trials. Randomized trials typically actively  
41 492 work for patient adherence to study medications and use study coordinators to regularly monitor  
42 493 patients to minimize missed doses. In our observational study, these typical adherence supports  
43 494 are not in place; thus, our data may reflect real-world lapses in patient behavior in refilling  
44 495 prescriptions, including partial regimen refills, which would not be observed in clinical trials.  
45 496 While there are concerns about the interpretation of observational data and the determination of  
46 497 causal relationships, it is not clear if a randomized study comparing an STR with a multiple-pill

1  
2  
3  
4  
5  
6  
7  
8  
9 498 regimen would be able to detect the observed differences unless there was less patient support  
10 499 than is standard in clinical trials.

11  
12 500 Our data do not suggest that all patients should be on an STR. There are many factors that  
13  
14 501 weigh in the decision of which regimen is best for any given patient, including pre-existing  
15  
16 502 virologic resistance and tolerability. In our study, the anticipated adherence benefits observed in  
17  
18 503 association with a lower pill burden is relevant but should not be construed as a suggestion that  
19  
20 504 an STR is the ideal choice for the entire population of patients with HIV. Nevertheless, our data  
21  
22 505 do support the continued development of additional STR options, to broaden the number of  
23  
24 506 patients for whom this is an option and the number of subsequent beneficial outcomes.

25  
26 507 Our study has several limitations common to observational claims database analyses.  
27  
28 508 Adherence was calculated by using pharmacy refill dates, and we have no measure of actual  
29  
30 509 patient adherence to the prescriptions they filled. However, this measure has been found to be a  
31  
32 510 useful proxy for actual medication adherence.<sup>[2430]</sup> Because we did not randomize patients to  
33  
34 511 the two different treatment regimens, we cannot exclude unmeasured confounding factors that  
35  
36 512 may have influenced our outcomes. Among the most important of these factors in this study was  
37  
38 513 that multiple trials have shown that medication resistance at the time of virologic failure is  
39  
40 514 significantly less common in boosted PI treatments than on other regimens, including  
41  
42 515 nonnucleoside/nucleotide reverse transcriptase inhibitor-based treatments.<sup>[2531,2632]</sup> Clinicians  
43  
44 516 could have chosen to prescribe a boosted-PI-containing regimen (all of which contain three or  
45  
46 517 more pills per day) to their less-adherent patients. It cannot be determined from this data set that  
47  
48 518 these patients would have been more adherent on an STR. Although we attempted to control for  
49  
50 519 some of these variables through the use of multivariable models that included some of these  
51  
52 520 factors (substance abuse and psychiatric diagnoses), residual confounding may remain. In  
53  
54 521 addition, we had no laboratory results from patients and thus cannot confirm the degree of



1  
2  
3  
4  
5  
6  
7  
8  
9 522 virologic suppression obtained across the regimens. Finally, although our data include  
10 523 information from the Medicaid programs in 11 states, the authors were blinded (as per data  
11 524 privacy rules) as to which specific states are captured. Although the database's documentation  
12 525 suggests that the states are geographically dispersed, we cannot assert that our findings would be  
13 526 fully representative of the general Medicaid population in the US.

14  
15  
16  
17  
18 527 In our study, a large proportion of HIV-treated individuals (15% of the total HIV-treated  
19 528 population) were excluded from the analysis due to their having received incomplete ART  
20 529 regimens. We did not have sufficient data on these patients to explain why their regimens were  
21 530 incomplete. However, a previous study found that physician medication errors were somewhat  
22 531 common in individuals with HIV, with the most common error occurring with boosted PIs  
23 532 (estimated at 5.3% of patients); such errors may explain some of the incomplete regimens  
24 533 observed in our analysis.<sup>[2733]</sup> Increased adoption of fixed-dose combinations as part of HIV  
25 534 treatment may help to alleviate the issue of incomplete regimens.

26  
27  
28  
29  
30  
31  
32  
33 535 During our study period, the only available single-pill ART regimen was coformulated  
34 536 efavirenz/emtricitabine/tenofovir disoproxil fumarate. It is possible that these results would not  
35 537 be generalizable to other one- and multi-pill regimens if other treatments have different efficacy  
36 538 and toxicity profiles. With the recent approval by the Food and Drug Administration of two other  
37 539 STRs (i.e., tenofovir, emtricitabine, and rilpivirine and tenofovir, emtricitabine, elvitegravir and  
38 540 cobicistat), it may eventually be possible to explore the applicability of our observations to other  
39 541 STRs.

40  
41  
42  
43  
44  
45  
46 542 In summary, this study supported the results as reported by Sax et al.<sup>[416]</sup> We found that  
47 543 patients who received ART as a single pill per day were significantly more likely to be highly  
48 544 adherent to therapy than patients who received multiple-pill regimens. This difference in  
49 545 adherence was associated with a lower risk of hospitalizations: patients with less-than-complete

1  
2  
3  
4  
5  
6  
7  
8  
9  
10  
11  
12  
13  
14  
15  
16  
17  
18  
19  
20  
21  
22  
23  
24  
25  
26  
27  
28  
29  
30  
31  
32  
33  
34  
35  
36  
37  
38  
39  
40  
41  
42  
43  
44  
45  
46  
47  
48  
49  
50  
51  
52  
53  
54  
55  
56  
57  
58  
59  
60

546 adherence were more likely to be hospitalized. While we acknowledge the limitations associated  
547 with any observational study, our data support our finding that the use of an STR may reduce  
548 health care costs as well as patient morbidity by decreasing hospitalization rates, which are  
549 higher in patients with less-than-complete medication adherence.

For peer review only

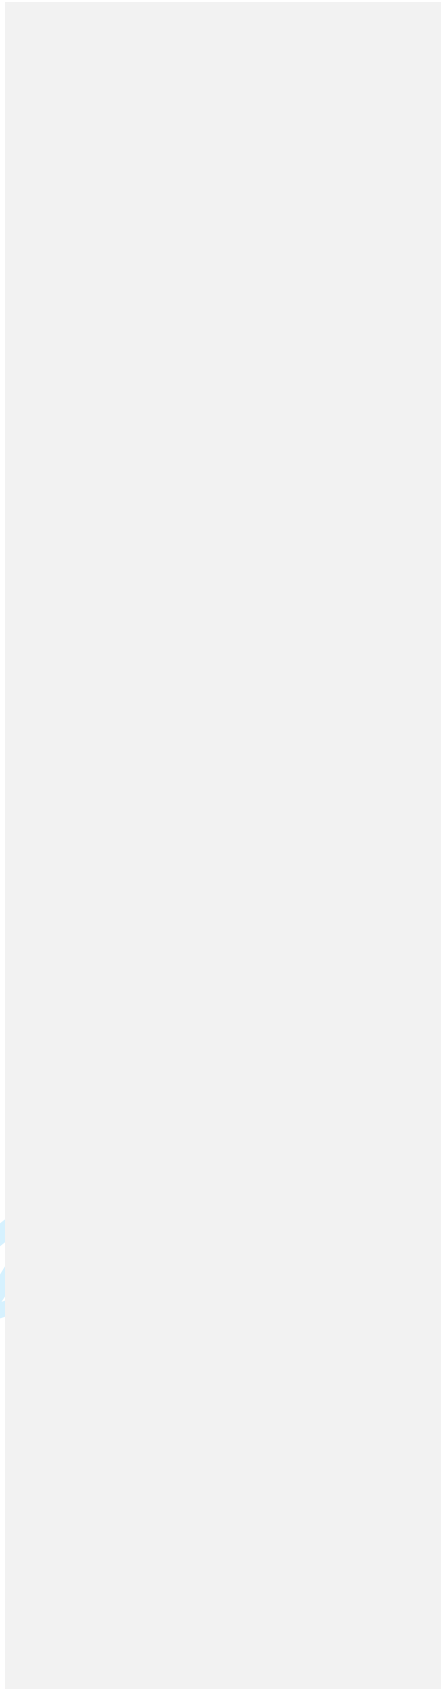

## 550 REFERENCES

- 551 1. Thompson MA, Aberg JA, Cahn P, Montaner JSG, Rizzardini G, et al. (2010)  
552 Recommendations of the IAS-USA Panel. *JAMA* 304: 321-333.
- 553 2. Henry K (2010) Report from the 17th Conference on Retroviruses and Opportunistic  
554 Infections. More data and answers from ACTG 5202. *J Watch AIDS Clin Care* 22 (4):  
555 30.
- 556 3. Rockstroh JK, Lennox JL, Dejesus E, Saag MS, Lazzarin A, et al; STARTMRK  
557 Investigators (2011) Long-term treatment with raltegravir or efavirenz combined with  
558 tenofovir/emtricitabine for treatment-naïve human immunodeficiency virus-1-infected  
559 patients: 156-week results from STARTMRK. *Clin Infect Dis* 53 (8): 807-816.
- 560 4. Fielden SJ, Rusch ML, Yip B, Wood E, Shannon K, et al. (2008) Nonadherence increases  
561 the risk of hospitalization among HIV-infected antiretroviral naïve patients started on  
562 HAART. *J Int Assoc Physicians AIDS Care* 7: 238-244.
- 563 5. Kitahata MM, Reed SD, Dillingham PW, Van Rompaey SE, Young AA, et al. (2004)  
564 Pharmacy-based assessment of adherence to HAART predicts virological and  
565 immunologic treatment response and clinical progression to AIDS and death. *Int J STD*  
566 *AIDS* 15: 803-810.
- 567 6. Wood E, Hogg RS, Yip B, Harrigan PR, O'Shaughnessy MV, et al. (2003) Effect of  
568 medication adherence on survival of HIV-infected adults who start highly active  
569 antiretroviral therapy when the CD4+ cell count is 0.200 to 0.350 × 10<sup>9</sup> cells/L. *Ann*  
570 *Intern Med* 139: 810-816.
- 571 7. Bangsberg DR, Perry S, Charlebois ED, Clark RA, Roberston M, et al. (2001)  
572 Nonadherence to highly active antiretroviral therapy predicts progression to AIDS. *AIDS*  
573 15: 1181-1183.

- 1  
2  
3  
4  
5  
6  
7  
8  
9 574 | 8. Paterson DL, Swindells S, Mohr J, Brester M, Vergis EN, et al. (2000) Adherence to  
10 575 | protease inhibitor therapy and outcomes in patients with HIV infection. *Ann Intern Med*  
11 |  
12 576 | 133: 21-30.
- 14 577 | 9. Arnsten J, Demas P, Farzadegan H, Grant RW, Gourevitch MN, et al. (2001)  
15 | Antiretroviral therapy adherence and viral suppression in HIV-infected drug users:  
16 578 | comparison of self-report and electronic monitoring. *Clin Infect Dis* 33: 1417-1423.  
17 |  
18 579 | 10. Bangsberg DR. (2006) Less than 95% adherence to nonnucleoside reverse-transcriptase  
19 | inhibitor therapy can lead to viral suppression. *Clin Infect Dis* 43(7): 939-941.  
20 580 |  
21 |  
22 581 | 8-11. Panel on Antiretroviral Guidelines for Adults and Adolescents, Department of  
23 |  
24 582 | Health and Human Services (2009) Guidelines for the Use of Antiretroviral Agents in  
25 |  
26 583 | HIV-1-Infected Adults and Adolescents. Available:  
27 584 | <http://www.aidsinfo.nih.gov/contentfiles/AdultandAdolescentGL001419.pdf>. Accessed  
28 585 |  
29 586 | 2012 Aug 25.
- 33 587 | 9-12. DeJesus E, Young B, Morales-Ramirez JO, Sloan L, Ward DJ, et al. (2009)  
34 |  
35 588 | Simplification of antiretroviral therapy to a single tablet regimen consisting of efavirenz,  
36 589 | emtricitabine and tenofovir disoproxil fumarate versus unmodified antiretroviral therapy  
37 590 | in virologically suppressed HIV-1-infected patients. *J Acquir Immune Defic Syndr*  
38 591 | 51: 163-174.
- 43 592 | 10-13. Hodder SL, Mounzer K, DeJesus E, Ebrahimi R, Grimm K, et al. (2010) Patient-  
44 593 | reported outcomes in virologically suppressed, HIV-1-infected subjects after switching to  
45 594 | a simplified, single tablet regimen of efavirenz, emtricitabine and tenofovir DF. *AIDS*  
46 595 | *Patient Care STDs* 24: 115-125.

- 1  
2  
3  
4  
5  
6  
7  
8  
9 596 | ~~11~~.14. Airoldi M, Zaccarelli M, Bisi L, Bini T, Antinori A, et al. (2010) One-pill once-a-  
10 597 | day HAART: a simplification strategy that improves adherence and quality of life of  
11  
12 598 | HIV-infected subjects. *Patient Prefer Adherence* 4: 115-125.
- 14 599 | ~~12~~.15. Bangsberg DR, Ragland K, Monk A, Deeks SG (2010) A single tablet regimen is  
15  
16 600 | associated with higher adherence and viral suppression than multiple tablet regimens in  
17  
18 601 | HIV+ homeless and marginally housed people. *AIDS* 24: 2835-2840.
- 20 602 | ~~13~~.16. Sax PE, Meyers JL, Mugavero M, Davis KL (2012) Adherence to antiretroviral  
21  
22 603 | treatment and correlation with risk of hospitalization among commercially insured HIV  
23  
24 604 | patients in the United States. *PLoS One* 7 (2): e31591.
- 26 605 | ~~14~~.17. Charlson ME, Pompei P, Ales KL, McKenzie CR (1987) A new method of  
27  
28 606 | classifying prognostic comorbidity in longitudinal studies: development and validation. *J*  
29  
30 607 | *Chron Dis* 40: 373-383.
- 31 608 | ~~15~~.18. Andrade SE, Kristijan KH, Frech F, Chan K (2006) Methods for evaluation of  
32  
33 609 | medication adherence and persistence using automated databases. *Pharmacoepidemiol*  
34  
35 610 | *Drug Saf* 15: 565-574.
- 37 611 | ~~16~~.19. Legorreta A, Yu A, Chernicoff H, Gilmore A, Jordan J, et al. (2005) Adherence to  
38  
39 612 | combined lamivudine + zidovudine versus individual components: a community-based  
40  
41 613 | retrospective Medicaid claims analysis. *AIDS Care* 17: 938-948.
- 43 614 | ~~17~~.20. Fielden SJ, Rusch ML, Yip B, Wood E, Shannon K, et al. (2008) Nonadherence  
44  
45 615 | increases the risk of hospitalization among HIV-infected antiretroviral naïve patients  
46  
47 616 | started on HAART. *J Int Assoc Physicians AIDS Care* 7: 238-244.
- 48 617 | ~~18~~.21. Juday T, Gupta S, Grimm K, Wagner S, Kim E (2011) Factors associated with  
49  
50 618 | complete adherence to HIV combination antiretroviral therapy. *HIV Clin Trials* 12: 71-  
51  
52 619 | 78.

- 1  
2  
3  
4  
5  
6  
7  
8  
9 620 | [22.](#) Cohen CJ, Davis KL, Meyers J. Association of partial adherence to antiretroviral therapy  
10 621 | with hospitalizations and healthcare costs in an HIV population. Poster presented at the  
11 622 | 11th International Congress on Drug Therapy in HIV Infection; November 2012.  
12 623 | Glasgow, United Kingdom.
- 13 624 | [23. Gebo KA, Diener-West M, Moore RD. \(2006\) Hospitalization rates in an urban cohort](#)  
14 625 | [after the introduction of highly active antiretroviral therapy. J Acquir Immune Defic](#)  
15 626 | [Syndr 27 \(2\):143-52.](#)
- 16 627 | [24. Fleming PL, Byers RH, Sweeney PA, Daniels D, Karon JM, Janssen RS. HIV prevalence](#)  
17 628 | [in the United States, 2000. Abstract presented at: 9th Conference on Retroviruses and](#)  
18 629 | [Opportunistic Infections: February 24–28, 2002; Seattle, WA.](#)
- 19 630 | [25. Samet JH, Freedberg KA, Savetsky JB, Sullivan LM, Stein MD. Understanding delay to](#)  
20 631 | [medical care for HIV infection: the long-term non-presenter. AIDS 2001;15\(1\):77–85.](#)
- 21 632 | ~~19-26.~~ [Metsch LR, Bell C, Pereyra M, Cardenas G, Sullivan T, et al. Hospitalized HIV-](#)  
22 633 | [infected patients in the era of highly active antiretroviral therapy. Am J Public Health.](#)  
23 634 | [2009;99\(6\):1045-9.](#)
- 24 635 | ~~20-27.~~ Burman W, Clumeck N, Cohen CJ, Cohn D, Cooper D, et al. (2006) CD4+ count-  
25 636 | guided interruption of antiretroviral treatment. N Eng J Med 355 (22): 2283-2296.
- 26 637 | ~~21-28.~~ Cohen CJ, Colson AE, Pierone G, DeJesus E, Kinder F, Elion R, Skiest D, Habel  
27 638 | A, Jensen J, J Garb, Schragr HS. The FOTO study: 24-week results support the safety  
28 639 | of a 2-day break on efavirenz-based antiretroviral therapy. Journal of the International  
29 640 | AIDS Society 2008;11 (Suppl. 1):019.
- 30 641 | ~~22-29.~~ Parienti J-J, Bangsberg DR, Verdon R, Gardner EM (2009) Better adherence with  
31 642 | once-daily antiretroviral regimens: a meta-analysis. Clin Infect Dis 48: 484-488.

- 1  
2  
3  
4  
5  
6  
7  
8  
9 643 | ~~23-30.~~ McMahon JH, Jordan MR, Kelley K, Bertagnolio S, Hong SY, et al. (2011)  
10 644 | Pharmacy adherence measures to assess adherence to antiretroviral therapy: review of the  
11 645 | literature and implications for treatment monitoring. Clin Infect Dis 52: 493-506.  
12  
13  
14 646 | ~~24-31.~~ Daar ES, Tierney C, Fischl MA, Sax PE, Mollan K, et al. (2011) Atazanavir plus  
15 647 | ritonavir or efavirenz as part of a 3-drug regimen for initial treatment of HIV-1. Ann  
16 648 | Intern Med 154: 445-456.  
17  
18  
19  
20 649 | ~~25-32.~~ Riddler SA, Haubrich R, DiRienzo AG, Peeples L, Powderly WG, et al. (2008)  
21 650 | Class-sparing regimens for initial treatment of HIV-1 infection. N Engl J Med 358: 2095-  
22 651 | 2106.  
23  
24  
25  
26 652 | ~~26-33.~~ Hellinger FJ, Encinosa WE (2010) The cost and incidence of prescribing errors  
27 653 | among privately insured HIV patients. Pharmacoeconomics 28: 23-34.  
28  
29  
30  
31  
32  
33  
34  
35  
36  
37  
38  
39  
40  
41  
42  
43  
44  
45  
46  
47  
48  
49  
50  
51  
52  
53  
54  
55  
56  
57  
58  
59  
60

1  
2  
3  
4  
5  
6  
7  
8  
9  
10  
11  
12  
13  
14  
15  
16  
17  
18  
19  
20  
21  
22  
23  
24  
25  
26  
27  
28  
29  
30  
31  
32  
33  
34  
35  
36  
37  
38  
39  
40  
41  
42  
43  
44  
45  
46  
47  
48  
49  
50  
51  
52  
53  
54  
55  
56  
57  
58  
59  
60

654 **FIGURE LEGENDS**

655 **Figure 1. Sample Selection Flow Chart**

656 **Figure 2. Adjusted Rate of Hospitalizations per 100 Patient-years, by Cohort**

657 **Figure 3. Hospitalizations per 100 Patient-Years, by Cohort and Adherence**

658 **Figure 43. Adjusted Monthly Health Care Costs, by Cohort**

For peer review only



1  
2  
3  
4  
5  
6  
7  
8  
9  
10  
11  
12  
13  
14  
15  
16  
17  
18  
19  
20  
21  
22  
23  
24  
25  
26  
27  
28  
29  
30  
31  
32  
33  
34  
35  
36  
37  
38  
39  
40  
41  
42  
43  
44  
45  
46  
47  
48  
49  
50  
51  
52  
53  
54  
55  
56  
57  
58  
59  
60

For peer review only

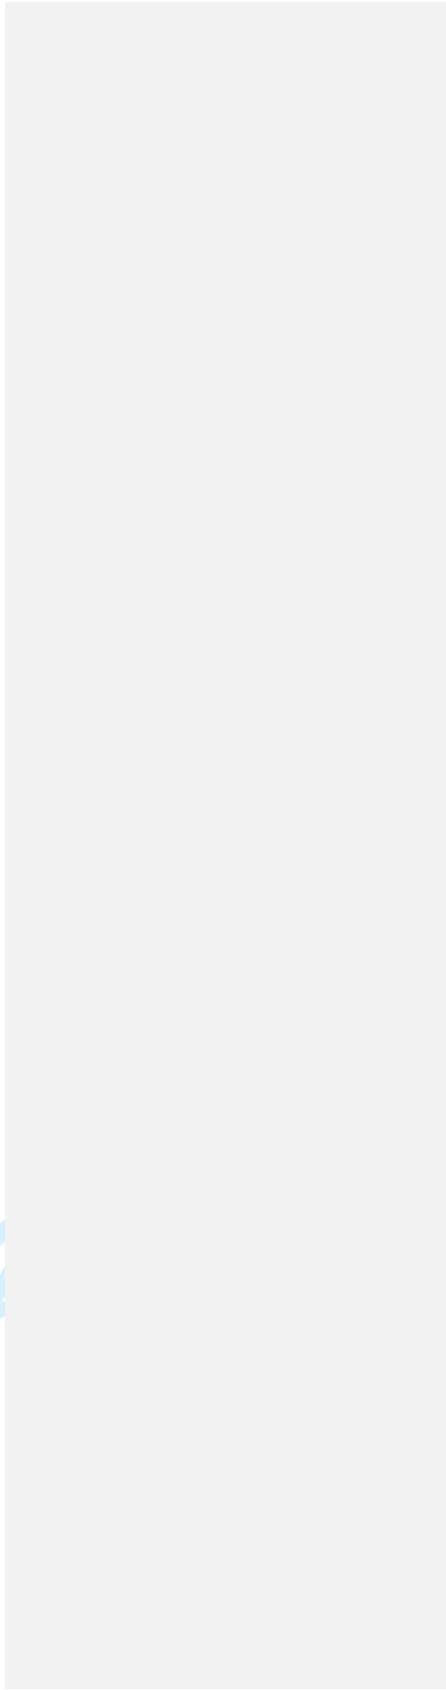

1  
2  
3  
4  
5  
6  
7  
8  
9  
10  
11  
12  
13  
14  
15  
16  
17  
18  
19  
20  
21  
22  
23  
24  
25  
26  
27  
28  
29  
30  
31  
32  
33  
34  
35  
36  
37  
38  
39  
40  
41  
42  
43  
44  
45  
46  
47  
48  
49  
50  
51  
52  
53  
54  
55  
56  
57  
58  
59  
60

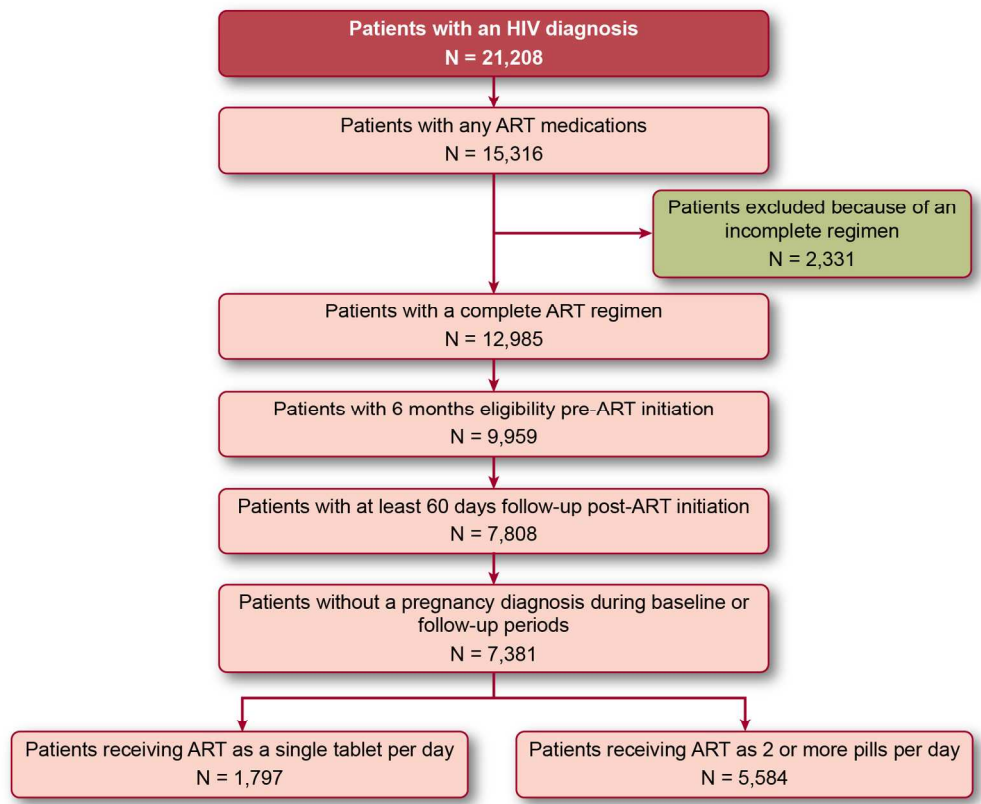

Figure 1. Sample Selection Flow Chart  
159x131mm (300 x 300 DPI)

For peer review only

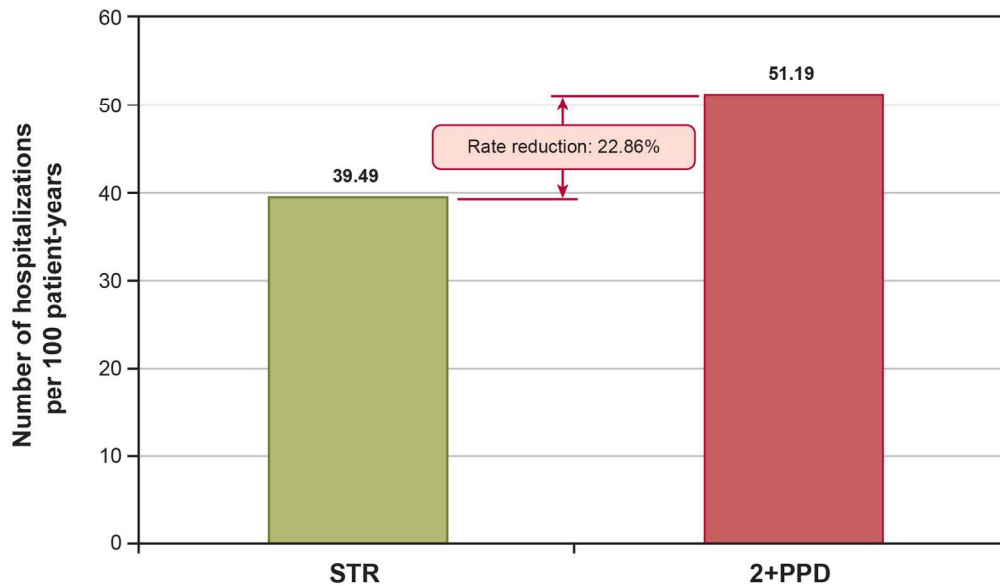

Figure 2. Adjusted Rate of Hospitalizations per 100 Patient-years, by Cohort  
152x89mm (300 x 300 DPI)

Review only

1  
2  
3  
4  
5  
6  
7  
8  
9  
10  
11  
12  
13  
14  
15  
16  
17  
18  
19  
20  
21  
22  
23  
24  
25  
26  
27  
28  
29  
30  
31  
32  
33  
34  
35  
36  
37  
38  
39  
40  
41  
42  
43  
44  
45  
46  
47  
48  
49  
50  
51  
52  
53  
54  
55  
56  
57  
58  
59  
60

1  
2  
3  
4  
5  
6  
7  
8  
9  
10  
11  
12  
13  
14  
15  
16  
17  
18  
19  
20  
21  
22  
23  
24  
25  
26  
27  
28  
29  
30  
31  
32  
33  
34  
35  
36  
37  
38  
39  
40  
41  
42  
43  
44  
45  
46  
47  
48  
49  
50  
51  
52  
53  
54  
55  
56  
57  
58  
59  
60

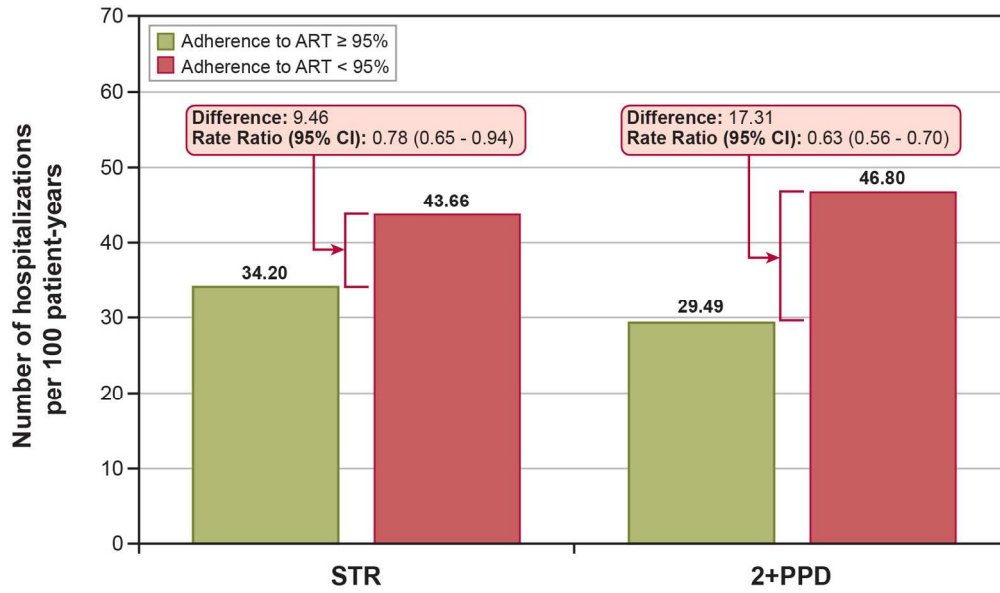

Figure 3. Hospitalizations per 100 Patient-Years, by Cohort and Adherence  
153x90mm (300 x 300 DPI)

review only

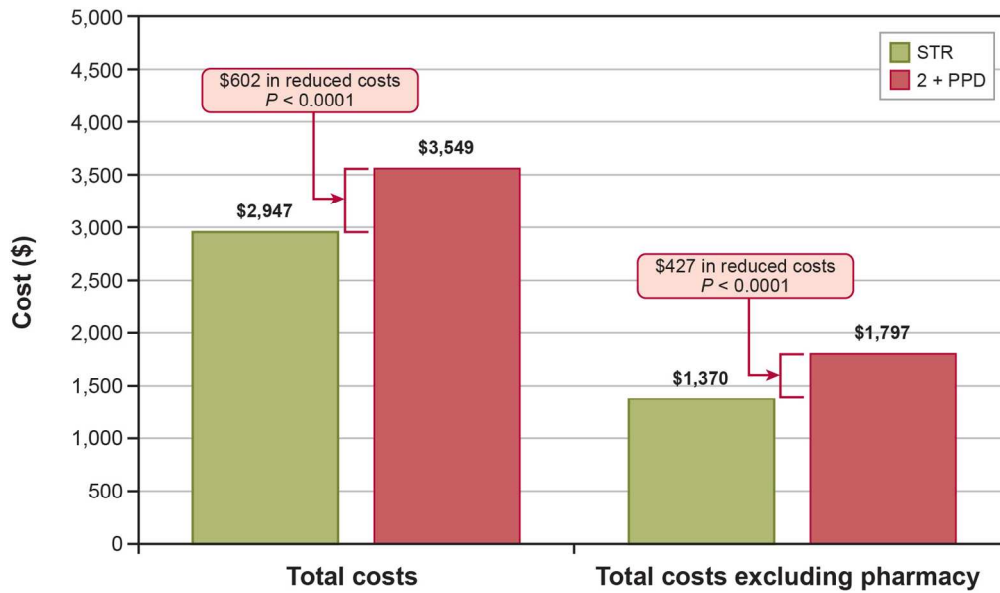

Figure 4. Adjusted Monthly Health Care Costs, by Cohort  
152x89mm (300 x 300 DPI)

review only
